# Supplementary material
Source: ML conference proceedings conference paper supplement (https://openreview.net/forum?id=6tumuDYeny)
Supplement: supplementary_material [file ATC_CID.xlsx]

## Sheet: Sheet1
ATC1	ATC2	ATC3	ATC4	ATC5	ATC5_name	CID
A - Alimentary tract and metabolism	A01 - Stomatological preparations	A01A - Stomatological preparations	A01AA - Caries prophylactic agents	A01AA01	Sodium fluoride	5235
A - Alimentary tract and metabolism	A01 - Stomatological preparations	A01A - Stomatological preparations	A01AA - Caries prophylactic agents	A01AA02	Sodium monofluorophosphate	24266
A - Alimentary tract and metabolism	A01 - Stomatological preparations	A01A - Stomatological preparations	A01AA - Caries prophylactic agents	A01AA03	Olaflur	23257
A - Alimentary tract and metabolism	A01 - Stomatological preparations	A01A - Stomatological preparations	A01AA - Caries prophylactic agents	A01AA04	Stannous fluoride	24550
A - Alimentary tract and metabolism	A01 - Stomatological preparations	A01A - Stomatological preparations	A01AA - Caries prophylactic agents	A01AA30	Combinations	-1
A - Alimentary tract and metabolism	A01 - Stomatological preparations	A01A - Stomatological preparations	A01AA - Caries prophylactic agents	A01AA51	Sodium fluoride, combinations	-1
A - Alimentary tract and metabolism	A01 - Stomatological preparations	A01A - Stomatological preparations	A01AB - Antiinfectives and antiseptics for local oral treatment	A01AB02	Hydrogen peroxide	784
A - Alimentary tract and metabolism	A01 - Stomatological preparations	A01A - Stomatological preparations	A01AB - Antiinfectives and antiseptics for local oral treatment	A01AB03	Chlorhexidine	9552079
A - Alimentary tract and metabolism	A01 - Stomatological preparations	A01A - Stomatological preparations	A01AB - Antiinfectives and antiseptics for local oral treatment	A01AB04	Amphotericin B	5280965
A - Alimentary tract and metabolism	A01 - Stomatological preparations	A01A - Stomatological preparations	A01AB - Antiinfectives and antiseptics for local oral treatment	A01AB05	Polynoxylin	-1
A - Alimentary tract and metabolism	A01 - Stomatological preparations	A01A - Stomatological preparations	A01AB - Antiinfectives and antiseptics for local oral treatment	A01AB06	Domiphen	3149
A - Alimentary tract and metabolism	A01 - Stomatological preparations	A01A - Stomatological preparations	A01AB - Antiinfectives and antiseptics for local oral treatment	A01AB07	Oxyquinoline	1923
A - Alimentary tract and metabolism	A01 - Stomatological preparations	A01A - Stomatological preparations	A01AB - Antiinfectives and antiseptics for local oral treatment	A01AB08	Neomycin	8378
A - Alimentary tract and metabolism	A01 - Stomatological preparations	A01A - Stomatological preparations	A01AB - Antiinfectives and antiseptics for local oral treatment	A01AB09	Miconazole	4189
A - Alimentary tract and metabolism	A01 - Stomatological preparations	A01A - Stomatological preparations	A01AB - Antiinfectives and antiseptics for local oral treatment	A01AB10	Natamycin	5284447
A - Alimentary tract and metabolism	A01 - Stomatological preparations	A01A - Stomatological preparations	A01AB - Antiinfectives and antiseptics for local oral treatment	A01AB11	Various	-1
A - Alimentary tract and metabolism	A01 - Stomatological preparations	A01A - Stomatological preparations	A01AB - Antiinfectives and antiseptics for local oral treatment	A01AB12	Hexetidine	3607
A - Alimentary tract and metabolism	A01 - Stomatological preparations	A01A - Stomatological preparations	A01AB - Antiinfectives and antiseptics for local oral treatment	A01AB13	Tetracycline	54675776
A - Alimentary tract and metabolism	A01 - Stomatological preparations	A01A - Stomatological preparations	A01AB - Antiinfectives and antiseptics for local oral treatment	A01AB14	Benzoxonium chloride	29563
A - Alimentary tract and metabolism	A01 - Stomatological preparations	A01A - Stomatological preparations	A01AB - Antiinfectives and antiseptics for local oral treatment	A01AB15	Tibezonium iodide	6918582
A - Alimentary tract and metabolism	A01 - Stomatological preparations	A01A - Stomatological preparations	A01AB - Antiinfectives and antiseptics for local oral treatment	A01AB16	Mepartricin	-1
A - Alimentary tract and metabolism	A01 - Stomatological preparations	A01A - Stomatological preparations	A01AB - Antiinfectives and antiseptics for local oral treatment	A01AB17	Metronidazole	4173
A - Alimentary tract and metabolism	A01 - Stomatological preparations	A01A - Stomatological preparations	A01AB - Antiinfectives and antiseptics for local oral treatment	A01AB18	Clotrimazole	2812
A - Alimentary tract and metabolism	A01 - Stomatological preparations	A01A - Stomatological preparations	A01AB - Antiinfectives and antiseptics for local oral treatment	A01AB19	Sodium perborate	-1
A - Alimentary tract and metabolism	A01 - Stomatological preparations	A01A - Stomatological preparations	A01AB - Antiinfectives and antiseptics for local oral treatment	A01AB21	Chlortetracycline	54675777
A - Alimentary tract and metabolism	A01 - Stomatological preparations	A01A - Stomatological preparations	A01AB - Antiinfectives and antiseptics for local oral treatment	A01AB22	Doxycycline	54671203
A - Alimentary tract and metabolism	A01 - Stomatological preparations	A01A - Stomatological preparations	A01AB - Antiinfectives and antiseptics for local oral treatment	A01AB23	Minocycline	54675783
A - Alimentary tract and metabolism	A01 - Stomatological preparations	A01A - Stomatological preparations	A01AB - Antiinfectives and antiseptics for local oral treatment	A01AB24	Octenidine	51167
A - Alimentary tract and metabolism	A01 - Stomatological preparations	A01A - Stomatological preparations	A01AB - Antiinfectives and antiseptics for local oral treatment	A01AB25	Oxytetracycline	54675779
A - Alimentary tract and metabolism	A01 - Stomatological preparations	A01A - Stomatological preparations	A01AB - Antiinfectives and antiseptics for local oral treatment	A01AB53	Chlorhexidine and cetylpyridinium	-1
A - Alimentary tract and metabolism	A01 - Stomatological preparations	A01A - Stomatological preparations	A01AC - Corticosteroids for local oral treatment	A01AC01	Triamcinolone	31307
A - Alimentary tract and metabolism	A01 - Stomatological preparations	A01A - Stomatological preparations	A01AC - Corticosteroids for local oral treatment	A01AC02	Dexamethasone	5743
A - Alimentary tract and metabolism	A01 - Stomatological preparations	A01A - Stomatological preparations	A01AC - Corticosteroids for local oral treatment	A01AC03	Hydrocortisone	5754
A - Alimentary tract and metabolism	A01 - Stomatological preparations	A01A - Stomatological preparations	A01AC - Corticosteroids for local oral treatment	A01AC04	Prednisolone	5755
A - Alimentary tract and metabolism	A01 - Stomatological preparations	A01A - Stomatological preparations	A01AC - Corticosteroids for local oral treatment	A01AC54	Prednisolone, combinations	-1
A - Alimentary tract and metabolism	A01 - Stomatological preparations	A01A - Stomatological preparations	A01AD - Other agents for local oral treatment	A01AD01	Epinephrine	5816
A - Alimentary tract and metabolism	A01 - Stomatological preparations	A01A - Stomatological preparations	A01AD - Other agents for local oral treatment	A01AD02	Benzydamine	12555
A - Alimentary tract and metabolism	A01 - Stomatological preparations	A01A - Stomatological preparations	A01AD - Other agents for local oral treatment	A01AD05	Acetylsalicylic acid	2244
A - Alimentary tract and metabolism	A01 - Stomatological preparations	A01A - Stomatological preparations	A01AD - Other agents for local oral treatment	A01AD06	Adrenalone	7436
A - Alimentary tract and metabolism	A01 - Stomatological preparations	A01A - Stomatological preparations	A01AD - Other agents for local oral treatment	A01AD07	Amlexanox	2161
A - Alimentary tract and metabolism	A01 - Stomatological preparations	A01A - Stomatological preparations	A01AD - Other agents for local oral treatment	A01AD08	Becaplermin	-1
A - Alimentary tract and metabolism	A01 - Stomatological preparations	A01A - Stomatological preparations	A01AD - Other agents for local oral treatment	A01AD11	Various	-1
A - Alimentary tract and metabolism	A02 - Drugs for acid related disorders	A02A - Antacids	A02AA - Magnesium compounds	A02AA01	Magnesium carbonate	11029
A - Alimentary tract and metabolism	A02 - Drugs for acid related disorders	A02A - Antacids	A02AA - Magnesium compounds	A02AA02	Magnesium oxide	14792
A - Alimentary tract and metabolism	A02 - Drugs for acid related disorders	A02A - Antacids	A02AA - Magnesium compounds	A02AA03	Magnesium peroxide	61745
A - Alimentary tract and metabolism	A02 - Drugs for acid related disorders	A02A - Antacids	A02AA - Magnesium compounds	A02AA04	Magnesium hydroxide	73981
A - Alimentary tract and metabolism	A02 - Drugs for acid related disorders	A02A - Antacids	A02AA - Magnesium compounds	A02AA05	Magnesium silicate	72941442
A - Alimentary tract and metabolism	A02 - Drugs for acid related disorders	A02A - Antacids	A02AA - Magnesium compounds	A02AA10	Combinations	-1
A - Alimentary tract and metabolism	A02 - Drugs for acid related disorders	A02A - Antacids	A02AB - Aluminium compounds	A02AB01	Aluminium hydroxide	-1
A - Alimentary tract and metabolism	A02 - Drugs for acid related disorders	A02A - Antacids	A02AB - Aluminium compounds	A02AB02	Algeldrate	22721319
A - Alimentary tract and metabolism	A02 - Drugs for acid related disorders	A02A - Antacids	A02AB - Aluminium compounds	A02AB03	Aluminium phosphate	64655
A - Alimentary tract and metabolism	A02 - Drugs for acid related disorders	A02A - Antacids	A02AB - Aluminium compounds	A02AB04	Dihydroxialumini sodium carbonate	23697815
A - Alimentary tract and metabolism	A02 - Drugs for acid related disorders	A02A - Antacids	A02AB - Aluminium compounds	A02AB05	Aluminium acetoacetate	21584777
A - Alimentary tract and metabolism	A02 - Drugs for acid related disorders	A02A - Antacids	A02AB - Aluminium compounds	A02AB06	Aloglutamol	72941505
A - Alimentary tract and metabolism	A02 - Drugs for acid related disorders	A02A - Antacids	A02AB - Aluminium compounds	A02AB07	Aluminium glycinate	-1
A - Alimentary tract and metabolism	A02 - Drugs for acid related disorders	A02A - Antacids	A02AB - Aluminium compounds	A02AB10	Combinations	-1
A - Alimentary tract and metabolism	A02 - Drugs for acid related disorders	A02A - Antacids	A02AC - Calcium compounds	A02AC01	Calcium carbonate	10112
A - Alimentary tract and metabolism	A02 - Drugs for acid related disorders	A02A - Antacids	A02AC - Calcium compounds	A02AC02	Calcium silicate	14941
A - Alimentary tract and metabolism	A02 - Drugs for acid related disorders	A02A - Antacids	A02AC - Calcium compounds	A02AC10	Combinations	-1
A - Alimentary tract and metabolism	A02 - Drugs for acid related disorders	A02A - Antacids	A02AD - Combinations and complexes of aluminium, calcium and magnesium compounds	A02AD01	Ordinary salt combinations	-1
A - Alimentary tract and metabolism	A02 - Drugs for acid related disorders	A02A - Antacids	A02AD - Combinations and complexes of aluminium, calcium and magnesium compounds	A02AD02	Magaldrate	122706784
A - Alimentary tract and metabolism	A02 - Drugs for acid related disorders	A02A - Antacids	A02AD - Combinations and complexes of aluminium, calcium and magnesium compounds	A02AD03	Almagate	71749
A - Alimentary tract and metabolism	A02 - Drugs for acid related disorders	A02A - Antacids	A02AD - Combinations and complexes of aluminium, calcium and magnesium compounds	A02AD04	Hydrotalcite	73415812
A - Alimentary tract and metabolism	A02 - Drugs for acid related disorders	A02A - Antacids	A02AD - Combinations and complexes of aluminium, calcium and magnesium compounds	A02AD05	Almasilate	156054
A - Alimentary tract and metabolism	A02 - Drugs for acid related disorders	A02A - Antacids	A02AF - Antacids with antiflatulents	A02AF01	Magaldrate and antiflatulents	-1
A - Alimentary tract and metabolism	A02 - Drugs for acid related disorders	A02A - Antacids	A02AF - Antacids with antiflatulents	A02AF02	Ordinary salt combinations and antiflatulents	-1
A - Alimentary tract and metabolism	A02 - Drugs for acid related disorders	A02B - Drugs for peptic ulcer and gastro-oesophageal reflux disease (gord)	A02BA - H2-receptor antagonists	A02BA01	Cimetidine	2756
A - Alimentary tract and metabolism	A02 - Drugs for acid related disorders	A02B - Drugs for peptic ulcer and gastro-oesophageal reflux disease (gord)	A02BA - H2-receptor antagonists	A02BA02	Ranitidine	3001055
A - Alimentary tract and metabolism	A02 - Drugs for acid related disorders	A02B - Drugs for peptic ulcer and gastro-oesophageal reflux disease (gord)	A02BA - H2-receptor antagonists	A02BA03	Famotidine	5702160
A - Alimentary tract and metabolism	A02 - Drugs for acid related disorders	A02B - Drugs for peptic ulcer and gastro-oesophageal reflux disease (gord)	A02BA - H2-receptor antagonists	A02BA04	Nizatidine	3033637
A - Alimentary tract and metabolism	A02 - Drugs for acid related disorders	A02B - Drugs for peptic ulcer and gastro-oesophageal reflux disease (gord)	A02BA - H2-receptor antagonists	A02BA05	Niperotidine	10203245
A - Alimentary tract and metabolism	A02 - Drugs for acid related disorders	A02B - Drugs for peptic ulcer and gastro-oesophageal reflux disease (gord)	A02BA - H2-receptor antagonists	A02BA06	Roxatidine	91276
A - Alimentary tract and metabolism	A02 - Drugs for acid related disorders	A02B - Drugs for peptic ulcer and gastro-oesophageal reflux disease (gord)	A02BA - H2-receptor antagonists	A02BA07	Ranitidine bismuth citrate	62984
A - Alimentary tract and metabolism	A02 - Drugs for acid related disorders	A02B - Drugs for peptic ulcer and gastro-oesophageal reflux disease (gord)	A02BA - H2-receptor antagonists	A02BA08	Lafutidine	5282136
A - Alimentary tract and metabolism	A02 - Drugs for acid related disorders	A02B - Drugs for peptic ulcer and gastro-oesophageal reflux disease (gord)	A02BA - H2-receptor antagonists	A02BA51	Cimetidine, combinations	-1
A - Alimentary tract and metabolism	A02 - Drugs for acid related disorders	A02B - Drugs for peptic ulcer and gastro-oesophageal reflux disease (gord)	A02BA - H2-receptor antagonists	A02BA53	Famotidine, combinations	-1
A - Alimentary tract and metabolism	A02 - Drugs for acid related disorders	A02B - Drugs for peptic ulcer and gastro-oesophageal reflux disease (gord)	A02BB - Prostaglandins	A02BB01	Misoprostol	5282381
A - Alimentary tract and metabolism	A02 - Drugs for acid related disorders	A02B - Drugs for peptic ulcer and gastro-oesophageal reflux disease (gord)	A02BB - Prostaglandins	A02BB02	Enprostil	5311225
A - Alimentary tract and metabolism	A02 - Drugs for acid related disorders	A02B - Drugs for peptic ulcer and gastro-oesophageal reflux disease (gord)	A02BC - Proton pump inhibitors	A02BC01	Omeprazole	4594
A - Alimentary tract and metabolism	A02 - Drugs for acid related disorders	A02B - Drugs for peptic ulcer and gastro-oesophageal reflux disease (gord)	A02BC - Proton pump inhibitors	A02BC02	Pantoprazole	4679
A - Alimentary tract and metabolism	A02 - Drugs for acid related disorders	A02B - Drugs for peptic ulcer and gastro-oesophageal reflux disease (gord)	A02BC - Proton pump inhibitors	A02BC03	Lansoprazole	3883
A - Alimentary tract and metabolism	A02 - Drugs for acid related disorders	A02B - Drugs for peptic ulcer and gastro-oesophageal reflux disease (gord)	A02BC - Proton pump inhibitors	A02BC04	Rabeprazole	5029
A - Alimentary tract and metabolism	A02 - Drugs for acid related disorders	A02B - Drugs for peptic ulcer and gastro-oesophageal reflux disease (gord)	A02BC - Proton pump inhibitors	A02BC05	Esomeprazole	9568614
A - Alimentary tract and metabolism	A02 - Drugs for acid related disorders	A02B - Drugs for peptic ulcer and gastro-oesophageal reflux disease (gord)	A02BC - Proton pump inhibitors	A02BC06	Dexlansoprazole	9578005
A - Alimentary tract and metabolism	A02 - Drugs for acid related disorders	A02B - Drugs for peptic ulcer and gastro-oesophageal reflux disease (gord)	A02BC - Proton pump inhibitors	A02BC07	Dexrabeprazole	9906855
A - Alimentary tract and metabolism	A02 - Drugs for acid related disorders	A02B - Drugs for peptic ulcer and gastro-oesophageal reflux disease (gord)	A02BC - Proton pump inhibitors	A02BC08	Vonoprazan	15981397
A - Alimentary tract and metabolism	A02 - Drugs for acid related disorders	A02B - Drugs for peptic ulcer and gastro-oesophageal reflux disease (gord)	A02BC - Proton pump inhibitors	A02BC09	Tegoprazan	23582846
A - Alimentary tract and metabolism	A02 - Drugs for acid related disorders	A02B - Drugs for peptic ulcer and gastro-oesophageal reflux disease (gord)	A02BC - Proton pump inhibitors	A02BC51	Omeprazole, combinations	-1
A - Alimentary tract and metabolism	A02 - Drugs for acid related disorders	A02B - Drugs for peptic ulcer and gastro-oesophageal reflux disease (gord)	A02BC - Proton pump inhibitors	A02BC53	Lansoprazole, combinations	-1
A - Alimentary tract and metabolism	A02 - Drugs for acid related disorders	A02B - Drugs for peptic ulcer and gastro-oesophageal reflux disease (gord)	A02BC - Proton pump inhibitors	A02BC54	Rabeprazole, combinations	-1
A - Alimentary tract and metabolism	A02 - Drugs for acid related disorders	A02B - Drugs for peptic ulcer and gastro-oesophageal reflux disease (gord)	A02BD - Combinations for eradication of helicobacter pylori	A02BD01	Omeprazole, amoxicillin and metronidazole	-1
A - Alimentary tract and metabolism	A02 - Drugs for acid related disorders	A02B - Drugs for peptic ulcer and gastro-oesophageal reflux disease (gord)	A02BD - Combinations for eradication of helicobacter pylori	A02BD02	Lansoprazole, tetracycline and metronidazole	-1
A - Alimentary tract and metabolism	A02 - Drugs for acid related disorders	A02B - Drugs for peptic ulcer and gastro-oesophageal reflux disease (gord)	A02BD - Combinations for eradication of helicobacter pylori	A02BD03	Lansoprazole, amoxicillin and metronidazole	-1
A - Alimentary tract and metabolism	A02 - Drugs for acid related disorders	A02B - Drugs for peptic ulcer and gastro-oesophageal reflux disease (gord)	A02BD - Combinations for eradication of helicobacter pylori	A02BD04	Pantoprazole, amoxicillin and clarithromycin	-1
A - Alimentary tract and metabolism	A02 - Drugs for acid related disorders	A02B - Drugs for peptic ulcer and gastro-oesophageal reflux disease (gord)	A02BD - Combinations for eradication of helicobacter pylori	A02BD05	Omeprazole, amoxicillin and clarithromycin	-1
A - Alimentary tract and metabolism	A02 - Drugs for acid related disorders	A02B - Drugs for peptic ulcer and gastro-oesophageal reflux disease (gord)	A02BD - Combinations for eradication of helicobacter pylori	A02BD06	Esomeprazole, amoxicillin and clarithromycin	-1
A - Alimentary tract and metabolism	A02 - Drugs for acid related disorders	A02B - Drugs for peptic ulcer and gastro-oesophageal reflux disease (gord)	A02BD - Combinations for eradication of helicobacter pylori	A02BD07	Lansoprazole, amoxicillin and clarithromycin	24847953
A - Alimentary tract and metabolism	A02 - Drugs for acid related disorders	A02B - Drugs for peptic ulcer and gastro-oesophageal reflux disease (gord)	A02BD - Combinations for eradication of helicobacter pylori	A02BD08	Bismuth subcitrate, tetracycline and metronidazole	-1
A - Alimentary tract and metabolism	A02 - Drugs for acid related disorders	A02B - Drugs for peptic ulcer and gastro-oesophageal reflux disease (gord)	A02BD - Combinations for eradication of helicobacter pylori	A02BD09	Lansoprazole, clarithromycin and tinidazole	-1
A - Alimentary tract and metabolism	A02 - Drugs for acid related disorders	A02B - Drugs for peptic ulcer and gastro-oesophageal reflux disease (gord)	A02BD - Combinations for eradication of helicobacter pylori	A02BD10	Lansoprazole, amoxicillin and levofloxacin	-1
A - Alimentary tract and metabolism	A02 - Drugs for acid related disorders	A02B - Drugs for peptic ulcer and gastro-oesophageal reflux disease (gord)	A02BD - Combinations for eradication of helicobacter pylori	A02BD11	Pantoprazole, amoxicillin, clarithromycin and metronidazole	-1
A - Alimentary tract and metabolism	A02 - Drugs for acid related disorders	A02B - Drugs for peptic ulcer and gastro-oesophageal reflux disease (gord)	A02BD - Combinations for eradication of helicobacter pylori	A02BD12	Rabeprazole, amoxicillin and clarithromycin	-1
A - Alimentary tract and metabolism	A02 - Drugs for acid related disorders	A02B - Drugs for peptic ulcer and gastro-oesophageal reflux disease (gord)	A02BD - Combinations for eradication of helicobacter pylori	A02BD13	Rabeprazole, amoxicillin and metronidazole	-1
A - Alimentary tract and metabolism	A02 - Drugs for acid related disorders	A02B - Drugs for peptic ulcer and gastro-oesophageal reflux disease (gord)	A02BD - Combinations for eradication of helicobacter pylori	A02BD14	Vonoprazan, amoxicillin and clarithromycin	-1
A - Alimentary tract and metabolism	A02 - Drugs for acid related disorders	A02B - Drugs for peptic ulcer and gastro-oesophageal reflux disease (gord)	A02BD - Combinations for eradication of helicobacter pylori	A02BD15	Vonoprazan, amoxicillin and metronidazole	-1
A - Alimentary tract and metabolism	A02 - Drugs for acid related disorders	A02B - Drugs for peptic ulcer and gastro-oesophageal reflux disease (gord)	A02BD - Combinations for eradication of helicobacter pylori	A02BD16	Omeprazole, amoxicillin and rifabutin	-1
A - Alimentary tract and metabolism	A02 - Drugs for acid related disorders	A02B - Drugs for peptic ulcer and gastro-oesophageal reflux disease (gord)	A02BD - Combinations for eradication of helicobacter pylori	A02BD17	Vonoprazan and amoxicillin	-1
A - Alimentary tract and metabolism	A02 - Drugs for acid related disorders	A02B - Drugs for peptic ulcer and gastro-oesophageal reflux disease (gord)	A02BX - Other drugs for peptic ulcer and gastro-oesophageal reflux disease (gord)	A02BX01	Carbenoxolone	636403
A - Alimentary tract and metabolism	A02 - Drugs for acid related disorders	A02B - Drugs for peptic ulcer and gastro-oesophageal reflux disease (gord)	A02BX - Other drugs for peptic ulcer and gastro-oesophageal reflux disease (gord)	A02BX02	Sucralfate	121494085
A - Alimentary tract and metabolism	A02 - Drugs for acid related disorders	A02B - Drugs for peptic ulcer and gastro-oesophageal reflux disease (gord)	A02BX - Other drugs for peptic ulcer and gastro-oesophageal reflux disease (gord)	A02BX03	Pirenzepine	4848
A - Alimentary tract and metabolism	A02 - Drugs for acid related disorders	A02B - Drugs for peptic ulcer and gastro-oesophageal reflux disease (gord)	A02BX - Other drugs for peptic ulcer and gastro-oesophageal reflux disease (gord)	A02BX04	Methiosulfonium chloride	16217806
A - Alimentary tract and metabolism	A02 - Drugs for acid related disorders	A02B - Drugs for peptic ulcer and gastro-oesophageal reflux disease (gord)	A02BX - Other drugs for peptic ulcer and gastro-oesophageal reflux disease (gord)	A02BX05	Bismuth subcitrate	10101269
A - Alimentary tract and metabolism	A02 - Drugs for acid related disorders	A02B - Drugs for peptic ulcer and gastro-oesophageal reflux disease (gord)	A02BX - Other drugs for peptic ulcer and gastro-oesophageal reflux disease (gord)	A02BX06	Proglumide	4922
A - Alimentary tract and metabolism	A02 - Drugs for acid related disorders	A02B - Drugs for peptic ulcer and gastro-oesophageal reflux disease (gord)	A02BX - Other drugs for peptic ulcer and gastro-oesophageal reflux disease (gord)	A02BX07	Gefarnate	5282182
A - Alimentary tract and metabolism	A02 - Drugs for acid related disorders	A02B - Drugs for peptic ulcer and gastro-oesophageal reflux disease (gord)	A02BX - Other drugs for peptic ulcer and gastro-oesophageal reflux disease (gord)	A02BX08	Sulglicotide	-1
A - Alimentary tract and metabolism	A02 - Drugs for acid related disorders	A02B - Drugs for peptic ulcer and gastro-oesophageal reflux disease (gord)	A02BX - Other drugs for peptic ulcer and gastro-oesophageal reflux disease (gord)	A02BX09	Acetoxolone	94320
A - Alimentary tract and metabolism	A02 - Drugs for acid related disorders	A02B - Drugs for peptic ulcer and gastro-oesophageal reflux disease (gord)	A02BX - Other drugs for peptic ulcer and gastro-oesophageal reflux disease (gord)	A02BX10	Zolimidine	14652
A - Alimentary tract and metabolism	A02 - Drugs for acid related disorders	A02B - Drugs for peptic ulcer and gastro-oesophageal reflux disease (gord)	A02BX - Other drugs for peptic ulcer and gastro-oesophageal reflux disease (gord)	A02BX11	Troxipide	5597
A - Alimentary tract and metabolism	A02 - Drugs for acid related disorders	A02B - Drugs for peptic ulcer and gastro-oesophageal reflux disease (gord)	A02BX - Other drugs for peptic ulcer and gastro-oesophageal reflux disease (gord)	A02BX12	Bismuth subnitrate	-1
A - Alimentary tract and metabolism	A02 - Drugs for acid related disorders	A02B - Drugs for peptic ulcer and gastro-oesophageal reflux disease (gord)	A02BX - Other drugs for peptic ulcer and gastro-oesophageal reflux disease (gord)	A02BX13	Alginic acid	-1
A - Alimentary tract and metabolism	A02 - Drugs for acid related disorders	A02B - Drugs for peptic ulcer and gastro-oesophageal reflux disease (gord)	A02BX - Other drugs for peptic ulcer and gastro-oesophageal reflux disease (gord)	A02BX14	Rebamipide	5042
A - Alimentary tract and metabolism	A02 - Drugs for acid related disorders	A02B - Drugs for peptic ulcer and gastro-oesophageal reflux disease (gord)	A02BX - Other drugs for peptic ulcer and gastro-oesophageal reflux disease (gord)	A02BX15	Teprenone	5282199
A - Alimentary tract and metabolism	A02 - Drugs for acid related disorders	A02B - Drugs for peptic ulcer and gastro-oesophageal reflux disease (gord)	A02BX - Other drugs for peptic ulcer and gastro-oesophageal reflux disease (gord)	A02BX16	Irsogladine	3752
A - Alimentary tract and metabolism	A02 - Drugs for acid related disorders	A02B - Drugs for peptic ulcer and gastro-oesophageal reflux disease (gord)	A02BX - Other drugs for peptic ulcer and gastro-oesophageal reflux disease (gord)	A02BX51	Carbenoxolone, combinations excl. psycholeptics	-1
A - Alimentary tract and metabolism	A02 - Drugs for acid related disorders	A02B - Drugs for peptic ulcer and gastro-oesophageal reflux disease (gord)	A02BX - Other drugs for peptic ulcer and gastro-oesophageal reflux disease (gord)	A02BX71	Carbenoxolone, combinations with psycholeptics	-1
A - Alimentary tract and metabolism	A02 - Drugs for acid related disorders	A02B - Drugs for peptic ulcer and gastro-oesophageal reflux disease (gord)	A02BX - Other drugs for peptic ulcer and gastro-oesophageal reflux disease (gord)	A02BX77	Gefarnate, combinations with psycholeptics	-1
A - Alimentary tract and metabolism	A03 - Drugs for functional gastrointestinal disorders	A03A - Drugs for functional gastrointestinal disorders	A03AA - Synthetic anticholinergics, esters with tertiary amino group	A03AA01	Oxyphencyclimine	4642
A - Alimentary tract and metabolism	A03 - Drugs for functional gastrointestinal disorders	A03A - Drugs for functional gastrointestinal disorders	A03AA - Synthetic anticholinergics, esters with tertiary amino group	A03AA03	Camylofin	5902
A - Alimentary tract and metabolism	A03 - Drugs for functional gastrointestinal disorders	A03A - Drugs for functional gastrointestinal disorders	A03AA - Synthetic anticholinergics, esters with tertiary amino group	A03AA04	Mebeverine	4031
A - Alimentary tract and metabolism	A03 - Drugs for functional gastrointestinal disorders	A03A - Drugs for functional gastrointestinal disorders	A03AA - Synthetic anticholinergics, esters with tertiary amino group	A03AA05	Trimebutine	5573
A - Alimentary tract and metabolism	A03 - Drugs for functional gastrointestinal disorders	A03A - Drugs for functional gastrointestinal disorders	A03AA - Synthetic anticholinergics, esters with tertiary amino group	A03AA06	Rociverine	20059462
A - Alimentary tract and metabolism	A03 - Drugs for functional gastrointestinal disorders	A03A - Drugs for functional gastrointestinal disorders	A03AA - Synthetic anticholinergics, esters with tertiary amino group	A03AA07	Dicycloverine	3042
A - Alimentary tract and metabolism	A03 - Drugs for functional gastrointestinal disorders	A03A - Drugs for functional gastrointestinal disorders	A03AA - Synthetic anticholinergics, esters with tertiary amino group	A03AA08	Dihexyverine	21788
A - Alimentary tract and metabolism	A03 - Drugs for functional gastrointestinal disorders	A03A - Drugs for functional gastrointestinal disorders	A03AA - Synthetic anticholinergics, esters with tertiary amino group	A03AA09	Difemerine	165124
A - Alimentary tract and metabolism	A03 - Drugs for functional gastrointestinal disorders	A03A - Drugs for functional gastrointestinal disorders	A03AA - Synthetic anticholinergics, esters with tertiary amino group	A03AA30	Piperidolate	4839
A - Alimentary tract and metabolism	A03 - Drugs for functional gastrointestinal disorders	A03A - Drugs for functional gastrointestinal disorders	A03AB - Synthetic anticholinergics, quaternary ammonium compounds	A03AB01	Benzilone	66248
A - Alimentary tract and metabolism	A03 - Drugs for functional gastrointestinal disorders	A03A - Drugs for functional gastrointestinal disorders	A03AB - Synthetic anticholinergics, quaternary ammonium compounds	A03AB02	Glycopyrronium bromide	11693
A - Alimentary tract and metabolism	A03 - Drugs for functional gastrointestinal disorders	A03A - Drugs for functional gastrointestinal disorders	A03AB - Synthetic anticholinergics, quaternary ammonium compounds	A03AB03	Oxyphenonium	5749
A - Alimentary tract and metabolism	A03 - Drugs for functional gastrointestinal disorders	A03A - Drugs for functional gastrointestinal disorders	A03AB - Synthetic anticholinergics, quaternary ammonium compounds	A03AB04	Penthienate	6067
A - Alimentary tract and metabolism	A03 - Drugs for functional gastrointestinal disorders	A03A - Drugs for functional gastrointestinal disorders	A03AB - Synthetic anticholinergics, quaternary ammonium compounds	A03AB05	Propantheline	4934
A - Alimentary tract and metabolism	A03 - Drugs for functional gastrointestinal disorders	A03A - Drugs for functional gastrointestinal disorders	A03AB - Synthetic anticholinergics, quaternary ammonium compounds	A03AB06	Otilonium bromide	72092
A - Alimentary tract and metabolism	A03 - Drugs for functional gastrointestinal disorders	A03A - Drugs for functional gastrointestinal disorders	A03AB - Synthetic anticholinergics, quaternary ammonium compounds	A03AB07	Methantheline	4097
A - Alimentary tract and metabolism	A03 - Drugs for functional gastrointestinal disorders	A03A - Drugs for functional gastrointestinal disorders	A03AB - Synthetic anticholinergics, quaternary ammonium compounds	A03AB08	Tridihexethyl	20299
A - Alimentary tract and metabolism	A03 - Drugs for functional gastrointestinal disorders	A03A - Drugs for functional gastrointestinal disorders	A03AB - Synthetic anticholinergics, quaternary ammonium compounds	A03AB09	Isopropamide	3775
A - Alimentary tract and metabolism	A03 - Drugs for functional gastrointestinal disorders	A03A - Drugs for functional gastrointestinal disorders	A03AB - Synthetic anticholinergics, quaternary ammonium compounds	A03AB10	Hexocyclium	24199
A - Alimentary tract and metabolism	A03 - Drugs for functional gastrointestinal disorders	A03A - Drugs for functional gastrointestinal disorders	A03AB - Synthetic anticholinergics, quaternary ammonium compounds	A03AB11	Poldine	11018
A - Alimentary tract and metabolism	A03 - Drugs for functional gastrointestinal disorders	A03A - Drugs for functional gastrointestinal disorders	A03AB - Synthetic anticholinergics, quaternary ammonium compounds	A03AB12	Mepenzolate	4057
A - Alimentary tract and metabolism	A03 - Drugs for functional gastrointestinal disorders	A03A - Drugs for functional gastrointestinal disorders	A03AB - Synthetic anticholinergics, quaternary ammonium compounds	A03AB13	Bevonium	31800
A - Alimentary tract and metabolism	A03 - Drugs for functional gastrointestinal disorders	A03A - Drugs for functional gastrointestinal disorders	A03AB - Synthetic anticholinergics, quaternary ammonium compounds	A03AB14	Pipenzolate	4832
A - Alimentary tract and metabolism	A03 - Drugs for functional gastrointestinal disorders	A03A - Drugs for functional gastrointestinal disorders	A03AB - Synthetic anticholinergics, quaternary ammonium compounds	A03AB15	Diphemanil	6127
A - Alimentary tract and metabolism	A03 - Drugs for functional gastrointestinal disorders	A03A - Drugs for functional gastrointestinal disorders	A03AB - Synthetic anticholinergics, quaternary ammonium compounds	A03AB16	(2-benzhydryloxyethyl)diethyl-methylammonium iodide	80084
A - Alimentary tract and metabolism	A03 - Drugs for functional gastrointestinal disorders	A03A - Drugs for functional gastrointestinal disorders	A03AB - Synthetic anticholinergics, quaternary ammonium compounds	A03AB17	Tiemonium iodide	72142
A - Alimentary tract and metabolism	A03 - Drugs for functional gastrointestinal disorders	A03A - Drugs for functional gastrointestinal disorders	A03AB - Synthetic anticholinergics, quaternary ammonium compounds	A03AB18	Prifinium bromide	20749
A - Alimentary tract and metabolism	A03 - Drugs for functional gastrointestinal disorders	A03A - Drugs for functional gastrointestinal disorders	A03AB - Synthetic anticholinergics, quaternary ammonium compounds	A03AB19	Timepidium bromide	160243
A - Alimentary tract and metabolism	A03 - Drugs for functional gastrointestinal disorders	A03A - Drugs for functional gastrointestinal disorders	A03AB - Synthetic anticholinergics, quaternary ammonium compounds	A03AB21	Fenpiverinium	71490
A - Alimentary tract and metabolism	A03 - Drugs for functional gastrointestinal disorders	A03A - Drugs for functional gastrointestinal disorders	A03AB - Synthetic anticholinergics, quaternary ammonium compounds	A03AB53	Oxyphenonium, combinations	-1
A - Alimentary tract and metabolism	A03 - Drugs for functional gastrointestinal disorders	A03A - Drugs for functional gastrointestinal disorders	A03AC - Synthetic antispasmodics, amides with tertiary amines	A03AC02	Dimethylaminopropionylphenothiazine	113918
A - Alimentary tract and metabolism	A03 - Drugs for functional gastrointestinal disorders	A03A - Drugs for functional gastrointestinal disorders	A03AC - Synthetic antispasmodics, amides with tertiary amines	A03AC04	Nicofetamide	3033975
A - Alimentary tract and metabolism	A03 - Drugs for functional gastrointestinal disorders	A03A - Drugs for functional gastrointestinal disorders	A03AC - Synthetic antispasmodics, amides with tertiary amines	A03AC05	Tiropramide	42262
A - Alimentary tract and metabolism	A03 - Drugs for functional gastrointestinal disorders	A03A - Drugs for functional gastrointestinal disorders	A03AD - Papaverine and derivatives	A03AD01	Papaverine	4680
A - Alimentary tract and metabolism	A03 - Drugs for functional gastrointestinal disorders	A03A - Drugs for functional gastrointestinal disorders	A03AD - Papaverine and derivatives	A03AD02	Drotaverine	1712095
A - Alimentary tract and metabolism	A03 - Drugs for functional gastrointestinal disorders	A03A - Drugs for functional gastrointestinal disorders	A03AD - Papaverine and derivatives	A03AD30	Moxaverine	70882
A - Alimentary tract and metabolism	A03 - Drugs for functional gastrointestinal disorders	A03A - Drugs for functional gastrointestinal disorders	A03AE - Serotonin receptor antagonists	A03AE01	Alosetron	2099
A - Alimentary tract and metabolism	A03 - Drugs for functional gastrointestinal disorders	A03A - Drugs for functional gastrointestinal disorders	A03AE - Serotonin receptor antagonists	A03AE03	Cilansetron	6918107
A - Alimentary tract and metabolism	A03 - Drugs for functional gastrointestinal disorders	A03A - Drugs for functional gastrointestinal disorders	A03AX - Other drugs for functional gastrointestinal disorders	A03AX01	Fenpiprane	197785
A - Alimentary tract and metabolism	A03 - Drugs for functional gastrointestinal disorders	A03A - Drugs for functional gastrointestinal disorders	A03AX - Other drugs for functional gastrointestinal disorders	A03AX02	Diisopromine	22262
A - Alimentary tract and metabolism	A03 - Drugs for functional gastrointestinal disorders	A03A - Drugs for functional gastrointestinal disorders	A03AX - Other drugs for functional gastrointestinal disorders	A03AX03	Chlorbenzoxamine	71636
A - Alimentary tract and metabolism	A03 - Drugs for functional gastrointestinal disorders	A03A - Drugs for functional gastrointestinal disorders	A03AX - Other drugs for functional gastrointestinal disorders	A03AX04	Pinaverium	40704
A - Alimentary tract and metabolism	A03 - Drugs for functional gastrointestinal disorders	A03A - Drugs for functional gastrointestinal disorders	A03AX - Other drugs for functional gastrointestinal disorders	A03AX05	Fenoverine	72098
A - Alimentary tract and metabolism	A03 - Drugs for functional gastrointestinal disorders	A03A - Drugs for functional gastrointestinal disorders	A03AX - Other drugs for functional gastrointestinal disorders	A03AX06	Idanpramine	58521
A - Alimentary tract and metabolism	A03 - Drugs for functional gastrointestinal disorders	A03A - Drugs for functional gastrointestinal disorders	A03AX - Other drugs for functional gastrointestinal disorders	A03AX07	Proxazole	8590
A - Alimentary tract and metabolism	A03 - Drugs for functional gastrointestinal disorders	A03A - Drugs for functional gastrointestinal disorders	A03AX - Other drugs for functional gastrointestinal disorders	A03AX08	Alverine	3678
A - Alimentary tract and metabolism	A03 - Drugs for functional gastrointestinal disorders	A03A - Drugs for functional gastrointestinal disorders	A03AX - Other drugs for functional gastrointestinal disorders	A03AX09	Trepibutone	5536
A - Alimentary tract and metabolism	A03 - Drugs for functional gastrointestinal disorders	A03A - Drugs for functional gastrointestinal disorders	A03AX - Other drugs for functional gastrointestinal disorders	A03AX10	Isometheptene	22297
A - Alimentary tract and metabolism	A03 - Drugs for functional gastrointestinal disorders	A03A - Drugs for functional gastrointestinal disorders	A03AX - Other drugs for functional gastrointestinal disorders	A03AX11	Caroverine	65709
A - Alimentary tract and metabolism	A03 - Drugs for functional gastrointestinal disorders	A03A - Drugs for functional gastrointestinal disorders	A03AX - Other drugs for functional gastrointestinal disorders	A03AX12	Phloroglucinol	359
A - Alimentary tract and metabolism	A03 - Drugs for functional gastrointestinal disorders	A03A - Drugs for functional gastrointestinal disorders	A03AX - Other drugs for functional gastrointestinal disorders	A03AX13	Silicones	-1
A - Alimentary tract and metabolism	A03 - Drugs for functional gastrointestinal disorders	A03A - Drugs for functional gastrointestinal disorders	A03AX - Other drugs for functional gastrointestinal disorders	A03AX14	Valethamate	5648
A - Alimentary tract and metabolism	A03 - Drugs for functional gastrointestinal disorders	A03A - Drugs for functional gastrointestinal disorders	A03AX - Other drugs for functional gastrointestinal disorders	A03AX15	Menthae piperitae aetheroleum	-1
A - Alimentary tract and metabolism	A03 - Drugs for functional gastrointestinal disorders	A03A - Drugs for functional gastrointestinal disorders	A03AX - Other drugs for functional gastrointestinal disorders	A03AX30	Trimethyldiphenylpropylamine	30966
A - Alimentary tract and metabolism	A03 - Drugs for functional gastrointestinal disorders	A03A - Drugs for functional gastrointestinal disorders	A03AX - Other drugs for functional gastrointestinal disorders	A03AX58	Alverine, combinations	-1
A - Alimentary tract and metabolism	A03 - Drugs for functional gastrointestinal disorders	A03B - Belladonna and derivatives, plain	A03BA - Belladonna alkaloids, tertiary amines	A03BA01	Atropine	174174
A - Alimentary tract and metabolism	A03 - Drugs for functional gastrointestinal disorders	A03B - Belladonna and derivatives, plain	A03BA - Belladonna alkaloids, tertiary amines	A03BA03	Hyoscyamine	154417
A - Alimentary tract and metabolism	A03 - Drugs for functional gastrointestinal disorders	A03B - Belladonna and derivatives, plain	A03BA - Belladonna alkaloids, tertiary amines	A03BA04	Belladonna total alkaloids	265028
A - Alimentary tract and metabolism	A03 - Drugs for functional gastrointestinal disorders	A03B - Belladonna and derivatives, plain	A03BB - Belladonna alkaloids, semisynthetic, quaternary ammonium compounds	A03BB01	Butylscopolamine	160883
A - Alimentary tract and metabolism	A03 - Drugs for functional gastrointestinal disorders	A03B - Belladonna and derivatives, plain	A03BB - Belladonna alkaloids, semisynthetic, quaternary ammonium compounds	A03BB02	Methylatropine	656598
A - Alimentary tract and metabolism	A03 - Drugs for functional gastrointestinal disorders	A03B - Belladonna and derivatives, plain	A03BB - Belladonna alkaloids, semisynthetic, quaternary ammonium compounds	A03BB03	Methylscopolamine	71183
A - Alimentary tract and metabolism	A03 - Drugs for functional gastrointestinal disorders	A03B - Belladonna and derivatives, plain	A03BB - Belladonna alkaloids, semisynthetic, quaternary ammonium compounds	A03BB04	Fentonium	10347880
A - Alimentary tract and metabolism	A03 - Drugs for functional gastrointestinal disorders	A03B - Belladonna and derivatives, plain	A03BB - Belladonna alkaloids, semisynthetic, quaternary ammonium compounds	A03BB05	Cimetropium bromide	20054870
A - Alimentary tract and metabolism	A03 - Drugs for functional gastrointestinal disorders	A03B - Belladonna and derivatives, plain	A03BB - Belladonna alkaloids, semisynthetic, quaternary ammonium compounds	A03BB06	Homatropine methylbromide	10429215
A - Alimentary tract and metabolism	A03 - Drugs for functional gastrointestinal disorders	A03C - Antispasmodics in combination with psycholeptics	A03CA - Synthetic anticholinergic agents in combination with psycholeptics	A03CA01	Isopropamide and psycholeptics	-1
A - Alimentary tract and metabolism	A03 - Drugs for functional gastrointestinal disorders	A03C - Antispasmodics in combination with psycholeptics	A03CA - Synthetic anticholinergic agents in combination with psycholeptics	A03CA02	Clidinium and psycholeptics	-1
A - Alimentary tract and metabolism	A03 - Drugs for functional gastrointestinal disorders	A03C - Antispasmodics in combination with psycholeptics	A03CA - Synthetic anticholinergic agents in combination with psycholeptics	A03CA03	Oxyphencyclimine and psycholeptics	-1
A - Alimentary tract and metabolism	A03 - Drugs for functional gastrointestinal disorders	A03C - Antispasmodics in combination with psycholeptics	A03CA - Synthetic anticholinergic agents in combination with psycholeptics	A03CA04	Otilonium bromide and psycholeptics	-1
A - Alimentary tract and metabolism	A03 - Drugs for functional gastrointestinal disorders	A03C - Antispasmodics in combination with psycholeptics	A03CA - Synthetic anticholinergic agents in combination with psycholeptics	A03CA05	Glycopyrronium bromide and psycholeptics	-1
A - Alimentary tract and metabolism	A03 - Drugs for functional gastrointestinal disorders	A03C - Antispasmodics in combination with psycholeptics	A03CA - Synthetic anticholinergic agents in combination with psycholeptics	A03CA06	Bevonium and psycholeptics	-1
A - Alimentary tract and metabolism	A03 - Drugs for functional gastrointestinal disorders	A03C - Antispasmodics in combination with psycholeptics	A03CA - Synthetic anticholinergic agents in combination with psycholeptics	A03CA07	Ambutonium and psycholeptics	-1
A - Alimentary tract and metabolism	A03 - Drugs for functional gastrointestinal disorders	A03C - Antispasmodics in combination with psycholeptics	A03CA - Synthetic anticholinergic agents in combination with psycholeptics	A03CA08	Diphemanil and psycholeptics	-1
A - Alimentary tract and metabolism	A03 - Drugs for functional gastrointestinal disorders	A03C - Antispasmodics in combination with psycholeptics	A03CA - Synthetic anticholinergic agents in combination with psycholeptics	A03CA09	Pipenzolate and psycholeptics	-1
A - Alimentary tract and metabolism	A03 - Drugs for functional gastrointestinal disorders	A03C - Antispasmodics in combination with psycholeptics	A03CA - Synthetic anticholinergic agents in combination with psycholeptics	A03CA30	Emepronium and psycholeptics	-1
A - Alimentary tract and metabolism	A03 - Drugs for functional gastrointestinal disorders	A03C - Antispasmodics in combination with psycholeptics	A03CA - Synthetic anticholinergic agents in combination with psycholeptics	A03CA34	Propantheline and psycholeptics	-1
A - Alimentary tract and metabolism	A03 - Drugs for functional gastrointestinal disorders	A03C - Antispasmodics in combination with psycholeptics	A03CB - Belladonna and derivatives in combination with psycholeptics	A03CB01	Methylscopolamine and psycholeptics	-1
A - Alimentary tract and metabolism	A03 - Drugs for functional gastrointestinal disorders	A03C - Antispasmodics in combination with psycholeptics	A03CB - Belladonna and derivatives in combination with psycholeptics	A03CB02	Belladonna total alkaloids and psycholeptics	-1
A - Alimentary tract and metabolism	A03 - Drugs for functional gastrointestinal disorders	A03C - Antispasmodics in combination with psycholeptics	A03CB - Belladonna and derivatives in combination with psycholeptics	A03CB03	Atropine and psycholeptics	-1
A - Alimentary tract and metabolism	A03 - Drugs for functional gastrointestinal disorders	A03C - Antispasmodics in combination with psycholeptics	A03CB - Belladonna and derivatives in combination with psycholeptics	A03CB04	Homatropine methylbromide and psycholeptics	-1
A - Alimentary tract and metabolism	A03 - Drugs for functional gastrointestinal disorders	A03C - Antispasmodics in combination with psycholeptics	A03CB - Belladonna and derivatives in combination with psycholeptics	A03CB31	Hyoscyamine and psycholeptics	-1
A - Alimentary tract and metabolism	A03 - Drugs for functional gastrointestinal disorders	A03D - Antispasmodics in combination with analgesics	A03DA - Synthetic anticholinergic agents in combination with analgesics	A03DA01	Tropenzilone and analgesics	-1
A - Alimentary tract and metabolism	A03 - Drugs for functional gastrointestinal disorders	A03D - Antispasmodics in combination with analgesics	A03DA - Synthetic anticholinergic agents in combination with analgesics	A03DA02	Pitofenone and analgesics	-1
A - Alimentary tract and metabolism	A03 - Drugs for functional gastrointestinal disorders	A03D - Antispasmodics in combination with analgesics	A03DA - Synthetic anticholinergic agents in combination with analgesics	A03DA03	Bevonium and analgesics	-1
A - Alimentary tract and metabolism	A03 - Drugs for functional gastrointestinal disorders	A03D - Antispasmodics in combination with analgesics	A03DA - Synthetic anticholinergic agents in combination with analgesics	A03DA04	Ciclonium and analgesics	-1
A - Alimentary tract and metabolism	A03 - Drugs for functional gastrointestinal disorders	A03D - Antispasmodics in combination with analgesics	A03DA - Synthetic anticholinergic agents in combination with analgesics	A03DA05	Camylofin and analgesics	-1
A - Alimentary tract and metabolism	A03 - Drugs for functional gastrointestinal disorders	A03D - Antispasmodics in combination with analgesics	A03DA - Synthetic anticholinergic agents in combination with analgesics	A03DA06	Trospium and analgesics	-1
A - Alimentary tract and metabolism	A03 - Drugs for functional gastrointestinal disorders	A03D - Antispasmodics in combination with analgesics	A03DA - Synthetic anticholinergic agents in combination with analgesics	A03DA07	Tiemonium iodide and analgesics	-1
A - Alimentary tract and metabolism	A03 - Drugs for functional gastrointestinal disorders	A03D - Antispasmodics in combination with analgesics	A03DB - Belladonna and derivatives in combination with analgesics	A03DB04	Butylscopolamine and analgesics	-1
A - Alimentary tract and metabolism	A03 - Drugs for functional gastrointestinal disorders	A03F - Propulsives	A03FA - Propulsives	A03FA01	Metoclopramide	4168
A - Alimentary tract and metabolism	A03 - Drugs for functional gastrointestinal disorders	A03F - Propulsives	A03FA - Propulsives	A03FA02	Cisapride	6917698
A - Alimentary tract and metabolism	A03 - Drugs for functional gastrointestinal disorders	A03F - Propulsives	A03FA - Propulsives	A03FA03	Domperidone	3151
A - Alimentary tract and metabolism	A03 - Drugs for functional gastrointestinal disorders	A03F - Propulsives	A03FA - Propulsives	A03FA04	Bromopride	2446
A - Alimentary tract and metabolism	A03 - Drugs for functional gastrointestinal disorders	A03F - Propulsives	A03FA - Propulsives	A03FA05	Alizapride	135413504
A - Alimentary tract and metabolism	A03 - Drugs for functional gastrointestinal disorders	A03F - Propulsives	A03FA - Propulsives	A03FA06	Clebopride	2780
A - Alimentary tract and metabolism	A03 - Drugs for functional gastrointestinal disorders	A03F - Propulsives	A03FA - Propulsives	A03FA07	Itopride	3792
A - Alimentary tract and metabolism	A03 - Drugs for functional gastrointestinal disorders	A03F - Propulsives	A03FA - Propulsives	A03FA08	Cinitapride	68867
A - Alimentary tract and metabolism	A03 - Drugs for functional gastrointestinal disorders	A03F - Propulsives	A03FA - Propulsives	A03FA09	Mosapride	119584
A - Alimentary tract and metabolism	A03 - Drugs for functional gastrointestinal disorders	A03F - Propulsives	A03FA - Propulsives	A03FA10	Acotiamide	5282338
A - Alimentary tract and metabolism	A04 - Antiemetics and antinauseants	A04A - Antiemetics and antinauseants	A04AA - Serotonin (5ht3) antagonists	A04AA01	Ondansetron	4595
A - Alimentary tract and metabolism	A04 - Antiemetics and antinauseants	A04A - Antiemetics and antinauseants	A04AA - Serotonin (5ht3) antagonists	A04AA02	Granisetron	5284566
A - Alimentary tract and metabolism	A04 - Antiemetics and antinauseants	A04A - Antiemetics and antinauseants	A04AA - Serotonin (5ht3) antagonists	A04AA03	Tropisetron	656665
A - Alimentary tract and metabolism	A04 - Antiemetics and antinauseants	A04A - Antiemetics and antinauseants	A04AA - Serotonin (5ht3) antagonists	A04AA04	Dolasetron	3033818
A - Alimentary tract and metabolism	A04 - Antiemetics and antinauseants	A04A - Antiemetics and antinauseants	A04AA - Serotonin (5ht3) antagonists	A04AA05	Palonosetron	6337614
A - Alimentary tract and metabolism	A04 - Antiemetics and antinauseants	A04A - Antiemetics and antinauseants	A04AA - Serotonin (5ht3) antagonists	A04AA55	Palonosetron, combinations	-1
A - Alimentary tract and metabolism	A04 - Antiemetics and antinauseants	A04A - Antiemetics and antinauseants	A04AD - Other antiemetics	A04AD01	Scopolamine	3000322
A - Alimentary tract and metabolism	A04 - Antiemetics and antinauseants	A04A - Antiemetics and antinauseants	A04AD - Other antiemetics	A04AD02	Cerium oxalate	165565
A - Alimentary tract and metabolism	A04 - Antiemetics and antinauseants	A04A - Antiemetics and antinauseants	A04AD - Other antiemetics	A04AD04	Chlorobutanol	5977
A - Alimentary tract and metabolism	A04 - Antiemetics and antinauseants	A04A - Antiemetics and antinauseants	A04AD - Other antiemetics	A04AD05	Metopimazine	26388
A - Alimentary tract and metabolism	A04 - Antiemetics and antinauseants	A04A - Antiemetics and antinauseants	A04AD - Other antiemetics	A04AD10	Dronabinol	16078
A - Alimentary tract and metabolism	A04 - Antiemetics and antinauseants	A04A - Antiemetics and antinauseants	A04AD - Other antiemetics	A04AD11	Nabilone	5284592
A - Alimentary tract and metabolism	A04 - Antiemetics and antinauseants	A04A - Antiemetics and antinauseants	A04AD - Other antiemetics	A04AD12	Aprepitant	135413536
A - Alimentary tract and metabolism	A04 - Antiemetics and antinauseants	A04A - Antiemetics and antinauseants	A04AD - Other antiemetics	A04AD13	Casopitant	9917021
A - Alimentary tract and metabolism	A04 - Antiemetics and antinauseants	A04A - Antiemetics and antinauseants	A04AD - Other antiemetics	A04AD14	Rolapitant	10311306
A - Alimentary tract and metabolism	A04 - Antiemetics and antinauseants	A04A - Antiemetics and antinauseants	A04AD - Other antiemetics	A04AD51	Scopolamine, combinations	-1
A - Alimentary tract and metabolism	A04 - Antiemetics and antinauseants	A04A - Antiemetics and antinauseants	A04AD - Other antiemetics	A04AD54	Chlorobutanol, combinations	-1
A - Alimentary tract and metabolism	A05 - Bile and liver therapy	A05A - Bile therapy	A05AA - Bile acids and derivatives	A05AA01	Chenodeoxycholic acid	10133
A - Alimentary tract and metabolism	A05 - Bile and liver therapy	A05A - Bile therapy	A05AA - Bile acids and derivatives	A05AA02	Ursodeoxycholic acid	31401
A - Alimentary tract and metabolism	A05 - Bile and liver therapy	A05A - Bile therapy	A05AA - Bile acids and derivatives	A05AA03	Cholic acid	221493
A - Alimentary tract and metabolism	A05 - Bile and liver therapy	A05A - Bile therapy	A05AA - Bile acids and derivatives	A05AA04	Obeticholic acid	447715
A - Alimentary tract and metabolism	A05 - Bile and liver therapy	A05A - Bile therapy	A05AA - Bile acids and derivatives	A05AA05	Ursodoxicoltaurine	9848818
A - Alimentary tract and metabolism	A05 - Bile and liver therapy	A05A - Bile therapy	A05AB - Preparations for biliary tract therapy	A05AB01	Nicotinyl methylamide	64950
A - Alimentary tract and metabolism	A05 - Bile and liver therapy	A05A - Bile therapy	A05AX - Other drugs for bile therapy	A05AX01	Piprozolin	5911905
A - Alimentary tract and metabolism	A05 - Bile and liver therapy	A05A - Bile therapy	A05AX - Other drugs for bile therapy	A05AX02	Hymecromone	5280567
A - Alimentary tract and metabolism	A05 - Bile and liver therapy	A05A - Bile therapy	A05AX - Other drugs for bile therapy	A05AX03	Cyclobutyrol	72065
A - Alimentary tract and metabolism	A05 - Bile and liver therapy	A05A - Bile therapy	A05AX - Other drugs for bile therapy	A05AX04	Maralixibat chloride	9831642
A - Alimentary tract and metabolism	A05 - Bile and liver therapy	A05A - Bile therapy	A05AX - Other drugs for bile therapy	A05AX05	Odevixibat	10153627
A - Alimentary tract and metabolism	A05 - Bile and liver therapy	A05A - Bile therapy	A05AX - Other drugs for bile therapy	A05AX06	Elafibranor	9864881
A - Alimentary tract and metabolism	A05 - Bile and liver therapy	A05B - Liver therapy, lipotropics	A05BA - Liver therapy	A05BA01	Arginine glutamate	165268
A - Alimentary tract and metabolism	A05 - Bile and liver therapy	A05B - Liver therapy, lipotropics	A05BA - Liver therapy	A05BA03	Silymarin	5213
A - Alimentary tract and metabolism	A05 - Bile and liver therapy	A05B - Liver therapy, lipotropics	A05BA - Liver therapy	A05BA04	Citiolone	14520
A - Alimentary tract and metabolism	A05 - Bile and liver therapy	A05B - Liver therapy, lipotropics	A05BA - Liver therapy	A05BA05	Epomediol	115056
A - Alimentary tract and metabolism	A05 - Bile and liver therapy	A05B - Liver therapy, lipotropics	A05BA - Liver therapy	A05BA06	Ornithine oxoglurate	78866
A - Alimentary tract and metabolism	A05 - Bile and liver therapy	A05B - Liver therapy, lipotropics	A05BA - Liver therapy	A05BA07	Tidiacic arginine	161685
A - Alimentary tract and metabolism	A05 - Bile and liver therapy	A05B - Liver therapy, lipotropics	A05BA - Liver therapy	A05BA08	Glycyrrhizic acid	14982
A - Alimentary tract and metabolism	A05 - Bile and liver therapy	A05B - Liver therapy, lipotropics	A05BA - Liver therapy	A05BA09	Metadoxine	115198
A - Alimentary tract and metabolism	A05 - Bile and liver therapy	A05B - Liver therapy, lipotropics	A05BA - Liver therapy	A05BA10	Phospholipids	-1
A - Alimentary tract and metabolism	A06 - Drugs for constipation	A06A - Drugs for constipation	A06AA - Softeners, emollients	A06AA01	Liquid paraffin	-1
A - Alimentary tract and metabolism	A06 - Drugs for constipation	A06A - Drugs for constipation	A06AA - Softeners, emollients	A06AA02	Docusate sodium	23673837
A - Alimentary tract and metabolism	A06 - Drugs for constipation	A06A - Drugs for constipation	A06AA - Softeners, emollients	A06AA51	Liquid paraffin, combinations	-1
A - Alimentary tract and metabolism	A06 - Drugs for constipation	A06A - Drugs for constipation	A06AB - Contact laxatives	A06AB01	Oxyphenisatine	31315
A - Alimentary tract and metabolism	A06 - Drugs for constipation	A06A - Drugs for constipation	A06AB - Contact laxatives	A06AB02	Bisacodyl	2391
A - Alimentary tract and metabolism	A06 - Drugs for constipation	A06A - Drugs for constipation	A06AB - Contact laxatives	A06AB03	Dantron	2950
A - Alimentary tract and metabolism	A06 - Drugs for constipation	A06A - Drugs for constipation	A06AB - Contact laxatives	A06AB04	Phenolphthalein	4764
A - Alimentary tract and metabolism	A06 - Drugs for constipation	A06A - Drugs for constipation	A06AB - Contact laxatives	A06AB05	Castor oil	-1
A - Alimentary tract and metabolism	A06 - Drugs for constipation	A06A - Drugs for constipation	A06AB - Contact laxatives	A06AB06	Senna glycosides	5199
A - Alimentary tract and metabolism	A06 - Drugs for constipation	A06A - Drugs for constipation	A06AB - Contact laxatives	A06AB07	Cascara	-1
A - Alimentary tract and metabolism	A06 - Drugs for constipation	A06A - Drugs for constipation	A06AB - Contact laxatives	A06AB08	Sodium picosulfate	68654
A - Alimentary tract and metabolism	A06 - Drugs for constipation	A06A - Drugs for constipation	A06AB - Contact laxatives	A06AB09	Bisoxatin	28689
A - Alimentary tract and metabolism	A06 - Drugs for constipation	A06A - Drugs for constipation	A06AB - Contact laxatives	A06AB20	Contact laxatives in combination	-1
A - Alimentary tract and metabolism	A06 - Drugs for constipation	A06A - Drugs for constipation	A06AB - Contact laxatives	A06AB30	Contact laxatives in combination with belladonna alkaloids	-1
A - Alimentary tract and metabolism	A06 - Drugs for constipation	A06A - Drugs for constipation	A06AB - Contact laxatives	A06AB52	Bisacodyl, combinations	-1
A - Alimentary tract and metabolism	A06 - Drugs for constipation	A06A - Drugs for constipation	A06AB - Contact laxatives	A06AB53	Dantron, combinations	-1
A - Alimentary tract and metabolism	A06 - Drugs for constipation	A06A - Drugs for constipation	A06AB - Contact laxatives	A06AB56	Senna glycosides, combinations	-1
A - Alimentary tract and metabolism	A06 - Drugs for constipation	A06A - Drugs for constipation	A06AB - Contact laxatives	A06AB57	Cascara, combinations	-1
A - Alimentary tract and metabolism	A06 - Drugs for constipation	A06A - Drugs for constipation	A06AB - Contact laxatives	A06AB58	Sodium picosulfate, combinations	-1
A - Alimentary tract and metabolism	A06 - Drugs for constipation	A06A - Drugs for constipation	A06AC - Bulk-forming laxatives	A06AC01	Ispaghula (psylla seeds)	-1
A - Alimentary tract and metabolism	A06 - Drugs for constipation	A06A - Drugs for constipation	A06AC - Bulk-forming laxatives	A06AC02	Ethulose	-1
A - Alimentary tract and metabolism	A06 - Drugs for constipation	A06A - Drugs for constipation	A06AC - Bulk-forming laxatives	A06AC03	Sterculia	-1
A - Alimentary tract and metabolism	A06 - Drugs for constipation	A06A - Drugs for constipation	A06AC - Bulk-forming laxatives	A06AC05	Linseed	-1
A - Alimentary tract and metabolism	A06 - Drugs for constipation	A06A - Drugs for constipation	A06AC - Bulk-forming laxatives	A06AC06	Methylcellulose	51063134
A - Alimentary tract and metabolism	A06 - Drugs for constipation	A06A - Drugs for constipation	A06AC - Bulk-forming laxatives	A06AC07	Triticum (wheat fibre)	-1
A - Alimentary tract and metabolism	A06 - Drugs for constipation	A06A - Drugs for constipation	A06AC - Bulk-forming laxatives	A06AC08	Polycarbophil calcium	-1
A - Alimentary tract and metabolism	A06 - Drugs for constipation	A06A - Drugs for constipation	A06AC - Bulk-forming laxatives	A06AC51	Ispaghula, combinations	-1
A - Alimentary tract and metabolism	A06 - Drugs for constipation	A06A - Drugs for constipation	A06AC - Bulk-forming laxatives	A06AC53	Sterculia, combinations	-1
A - Alimentary tract and metabolism	A06 - Drugs for constipation	A06A - Drugs for constipation	A06AC - Bulk-forming laxatives	A06AC55	Linseed, combinations	-1
A - Alimentary tract and metabolism	A06 - Drugs for constipation	A06A - Drugs for constipation	A06AD - Osmotically acting laxatives	A06AD01	Magnesium carbonate	11029
A - Alimentary tract and metabolism	A06 - Drugs for constipation	A06A - Drugs for constipation	A06AD - Osmotically acting laxatives	A06AD02	Magnesium oxide	14792
A - Alimentary tract and metabolism	A06 - Drugs for constipation	A06A - Drugs for constipation	A06AD - Osmotically acting laxatives	A06AD03	Magnesium peroxide	61745
A - Alimentary tract and metabolism	A06 - Drugs for constipation	A06A - Drugs for constipation	A06AD - Osmotically acting laxatives	A06AD04	Magnesium sulfate	24083
A - Alimentary tract and metabolism	A06 - Drugs for constipation	A06A - Drugs for constipation	A06AD - Osmotically acting laxatives	A06AD10	Mineral salts in combination	-1
A - Alimentary tract and metabolism	A06 - Drugs for constipation	A06A - Drugs for constipation	A06AD - Osmotically acting laxatives	A06AD11	Lactulose	11333
A - Alimentary tract and metabolism	A06 - Drugs for constipation	A06A - Drugs for constipation	A06AD - Osmotically acting laxatives	A06AD12	Lactitol	157355
A - Alimentary tract and metabolism	A06 - Drugs for constipation	A06A - Drugs for constipation	A06AD - Osmotically acting laxatives	A06AD13	Sodium sulfate	24436
A - Alimentary tract and metabolism	A06 - Drugs for constipation	A06A - Drugs for constipation	A06AD - Osmotically acting laxatives	A06AD14	Pentaerithrityl	8285
A - Alimentary tract and metabolism	A06 - Drugs for constipation	A06A - Drugs for constipation	A06AD - Osmotically acting laxatives	A06AD15	Macrogol	174
A - Alimentary tract and metabolism	A06 - Drugs for constipation	A06A - Drugs for constipation	A06AD - Osmotically acting laxatives	A06AD16	Mannitol	6251
A - Alimentary tract and metabolism	A06 - Drugs for constipation	A06A - Drugs for constipation	A06AD - Osmotically acting laxatives	A06AD17	Sodium phosphate	24243
A - Alimentary tract and metabolism	A06 - Drugs for constipation	A06A - Drugs for constipation	A06AD - Osmotically acting laxatives	A06AD18	Sorbitol	5780
A - Alimentary tract and metabolism	A06 - Drugs for constipation	A06A - Drugs for constipation	A06AD - Osmotically acting laxatives	A06AD19	Magnesium citrate	6099959
A - Alimentary tract and metabolism	A06 - Drugs for constipation	A06A - Drugs for constipation	A06AD - Osmotically acting laxatives	A06AD21	Sodium tartrate	13355
A - Alimentary tract and metabolism	A06 - Drugs for constipation	A06A - Drugs for constipation	A06AD - Osmotically acting laxatives	A06AD61	Lactulose, combinations	-1
A - Alimentary tract and metabolism	A06 - Drugs for constipation	A06A - Drugs for constipation	A06AD - Osmotically acting laxatives	A06AD65	Macrogol, combinations	-1
A - Alimentary tract and metabolism	A06 - Drugs for constipation	A06A - Drugs for constipation	A06AG - Enemas	A06AG01	Sodium phosphate	24243
A - Alimentary tract and metabolism	A06 - Drugs for constipation	A06A - Drugs for constipation	A06AG - Enemas	A06AG02	Bisacodyl	2391
A - Alimentary tract and metabolism	A06 - Drugs for constipation	A06A - Drugs for constipation	A06AG - Enemas	A06AG03	Dantron, incl. combinations	-1
A - Alimentary tract and metabolism	A06 - Drugs for constipation	A06A - Drugs for constipation	A06AG - Enemas	A06AG04	Glycerol	753
A - Alimentary tract and metabolism	A06 - Drugs for constipation	A06A - Drugs for constipation	A06AG - Enemas	A06AG06	Oil	-1
A - Alimentary tract and metabolism	A06 - Drugs for constipation	A06A - Drugs for constipation	A06AG - Enemas	A06AG07	Sorbitol	5780
A - Alimentary tract and metabolism	A06 - Drugs for constipation	A06A - Drugs for constipation	A06AG - Enemas	A06AG10	Docusate sodium, incl. combinations	-1
A - Alimentary tract and metabolism	A06 - Drugs for constipation	A06A - Drugs for constipation	A06AG - Enemas	A06AG11	Sodium lauryl sulfoacetate, incl. combinations	-1
A - Alimentary tract and metabolism	A06 - Drugs for constipation	A06A - Drugs for constipation	A06AG - Enemas	A06AG20	Combinations	-1
A - Alimentary tract and metabolism	A06 - Drugs for constipation	A06A - Drugs for constipation	A06AH - Peripheral opioid receptor antagonists	A06AH01	Methylnaltrexone bromide	5361917
A - Alimentary tract and metabolism	A06 - Drugs for constipation	A06A - Drugs for constipation	A06AH - Peripheral opioid receptor antagonists	A06AH02	Alvimopan	5488548
A - Alimentary tract and metabolism	A06 - Drugs for constipation	A06A - Drugs for constipation	A06AH - Peripheral opioid receptor antagonists	A06AH03	Naloxegol	56959087
A - Alimentary tract and metabolism	A06 - Drugs for constipation	A06A - Drugs for constipation	A06AH - Peripheral opioid receptor antagonists	A06AH04	Naloxone	5284596
A - Alimentary tract and metabolism	A06 - Drugs for constipation	A06A - Drugs for constipation	A06AH - Peripheral opioid receptor antagonists	A06AH05	Naldemedine	54732242
A - Alimentary tract and metabolism	A06 - Drugs for constipation	A06A - Drugs for constipation	A06AX - Other drugs for constipation	A06AX01	Glycerol	753
A - Alimentary tract and metabolism	A06 - Drugs for constipation	A06A - Drugs for constipation	A06AX - Other drugs for constipation	A06AX02	Carbon dioxide producing drugs	-1
A - Alimentary tract and metabolism	A06 - Drugs for constipation	A06A - Drugs for constipation	A06AX - Other drugs for constipation	A06AX03	Lubiprostone	157920
A - Alimentary tract and metabolism	A06 - Drugs for constipation	A06A - Drugs for constipation	A06AX - Other drugs for constipation	A06AX04	Linaclotide	16158208
A - Alimentary tract and metabolism	A06 - Drugs for constipation	A06A - Drugs for constipation	A06AX - Other drugs for constipation	A06AX05	Prucalopride	3052762
A - Alimentary tract and metabolism	A06 - Drugs for constipation	A06A - Drugs for constipation	A06AX - Other drugs for constipation	A06AX06	Tegaserod	135409453
A - Alimentary tract and metabolism	A06 - Drugs for constipation	A06A - Drugs for constipation	A06AX - Other drugs for constipation	A06AX07	Plecanatide	70693500
A - Alimentary tract and metabolism	A06 - Drugs for constipation	A06A - Drugs for constipation	A06AX - Other drugs for constipation	A06AX08	Tenapanor	71587953
A - Alimentary tract and metabolism	A06 - Drugs for constipation	A06A - Drugs for constipation	A06AX - Other drugs for constipation	A06AX09	Elobixibat	9939892
A - Alimentary tract and metabolism	A07 - Antidiarrheals, intestinal antiinflammatory/antiinfective agents	A07A - Intestinal antiinfectives	A07AA - Antibiotics	A07AA01	Neomycin	8378
A - Alimentary tract and metabolism	A07 - Antidiarrheals, intestinal antiinflammatory/antiinfective agents	A07A - Intestinal antiinfectives	A07AA - Antibiotics	A07AA02	Nystatin	6433272
A - Alimentary tract and metabolism	A07 - Antidiarrheals, intestinal antiinflammatory/antiinfective agents	A07A - Intestinal antiinfectives	A07AA - Antibiotics	A07AA03	Natamycin	5284447
A - Alimentary tract and metabolism	A07 - Antidiarrheals, intestinal antiinflammatory/antiinfective agents	A07A - Intestinal antiinfectives	A07AA - Antibiotics	A07AA04	Streptomycin	19649
A - Alimentary tract and metabolism	A07 - Antidiarrheals, intestinal antiinflammatory/antiinfective agents	A07A - Intestinal antiinfectives	A07AA - Antibiotics	A07AA05	Polymyxin B	-1
A - Alimentary tract and metabolism	A07 - Antidiarrheals, intestinal antiinflammatory/antiinfective agents	A07A - Intestinal antiinfectives	A07AA - Antibiotics	A07AA06	Paromomycin	165580
A - Alimentary tract and metabolism	A07 - Antidiarrheals, intestinal antiinflammatory/antiinfective agents	A07A - Intestinal antiinfectives	A07AA - Antibiotics	A07AA07	Amphotericin B	5280965
A - Alimentary tract and metabolism	A07 - Antidiarrheals, intestinal antiinflammatory/antiinfective agents	A07A - Intestinal antiinfectives	A07AA - Antibiotics	A07AA08	Kanamycin	6032
A - Alimentary tract and metabolism	A07 - Antidiarrheals, intestinal antiinflammatory/antiinfective agents	A07A - Intestinal antiinfectives	A07AA - Antibiotics	A07AA09	Vancomycin	14969
A - Alimentary tract and metabolism	A07 - Antidiarrheals, intestinal antiinflammatory/antiinfective agents	A07A - Intestinal antiinfectives	A07AA - Antibiotics	A07AA10	Colistin	5311054
A - Alimentary tract and metabolism	A07 - Antidiarrheals, intestinal antiinflammatory/antiinfective agents	A07A - Intestinal antiinfectives	A07AA - Antibiotics	A07AA11	Rifaximin	6436173
A - Alimentary tract and metabolism	A07 - Antidiarrheals, intestinal antiinflammatory/antiinfective agents	A07A - Intestinal antiinfectives	A07AA - Antibiotics	A07AA12	Fidaxomicin	10034073
A - Alimentary tract and metabolism	A07 - Antidiarrheals, intestinal antiinflammatory/antiinfective agents	A07A - Intestinal antiinfectives	A07AA - Antibiotics	A07AA13	Rifamycin	6324616
A - Alimentary tract and metabolism	A07 - Antidiarrheals, intestinal antiinflammatory/antiinfective agents	A07A - Intestinal antiinfectives	A07AA - Antibiotics	A07AA51	Neomycin, combinations	-1
A - Alimentary tract and metabolism	A07 - Antidiarrheals, intestinal antiinflammatory/antiinfective agents	A07A - Intestinal antiinfectives	A07AA - Antibiotics	A07AA54	Streptomycin, combinations	-1
A - Alimentary tract and metabolism	A07 - Antidiarrheals, intestinal antiinflammatory/antiinfective agents	A07A - Intestinal antiinfectives	A07AB - Sulfonamides	A07AB02	Phthalylsulfathiazole	4806
A - Alimentary tract and metabolism	A07 - Antidiarrheals, intestinal antiinflammatory/antiinfective agents	A07A - Intestinal antiinfectives	A07AB - Sulfonamides	A07AB03	Sulfaguanidine	5324
A - Alimentary tract and metabolism	A07 - Antidiarrheals, intestinal antiinflammatory/antiinfective agents	A07A - Intestinal antiinfectives	A07AB - Sulfonamides	A07AB04	Succinylsulfathiazole	5315
A - Alimentary tract and metabolism	A07 - Antidiarrheals, intestinal antiinflammatory/antiinfective agents	A07A - Intestinal antiinfectives	A07AC - Imidazole derivatives	A07AC01	Miconazole	4189
A - Alimentary tract and metabolism	A07 - Antidiarrheals, intestinal antiinflammatory/antiinfective agents	A07A - Intestinal antiinfectives	A07AX - Other intestinal antiinfectives	A07AX01	Broxyquinoline	2453
A - Alimentary tract and metabolism	A07 - Antidiarrheals, intestinal antiinflammatory/antiinfective agents	A07A - Intestinal antiinfectives	A07AX - Other intestinal antiinfectives	A07AX02	Acetarsol	1985
A - Alimentary tract and metabolism	A07 - Antidiarrheals, intestinal antiinflammatory/antiinfective agents	A07A - Intestinal antiinfectives	A07AX - Other intestinal antiinfectives	A07AX03	Nifuroxazide	5337997
A - Alimentary tract and metabolism	A07 - Antidiarrheals, intestinal antiinflammatory/antiinfective agents	A07A - Intestinal antiinfectives	A07AX - Other intestinal antiinfectives	A07AX04	Nifurzide	9571044
A - Alimentary tract and metabolism	A07 - Antidiarrheals, intestinal antiinflammatory/antiinfective agents	A07B - Intestinal adsorbents	A07BA - Charcoal preparations	A07BA01	Medicinal charcoal	-1
A - Alimentary tract and metabolism	A07 - Antidiarrheals, intestinal antiinflammatory/antiinfective agents	A07B - Intestinal adsorbents	A07BA - Charcoal preparations	A07BA51	Medicinal charcoal, combinations	-1
A - Alimentary tract and metabolism	A07 - Antidiarrheals, intestinal antiinflammatory/antiinfective agents	A07B - Intestinal adsorbents	A07BC - Other intestinal adsorbents	A07BC01	Pectin	-1
A - Alimentary tract and metabolism	A07 - Antidiarrheals, intestinal antiinflammatory/antiinfective agents	A07B - Intestinal adsorbents	A07BC - Other intestinal adsorbents	A07BC02	Kaolin	-1
A - Alimentary tract and metabolism	A07 - Antidiarrheals, intestinal antiinflammatory/antiinfective agents	A07B - Intestinal adsorbents	A07BC - Other intestinal adsorbents	A07BC03	Crospovidone	131751496
A - Alimentary tract and metabolism	A07 - Antidiarrheals, intestinal antiinflammatory/antiinfective agents	A07B - Intestinal adsorbents	A07BC - Other intestinal adsorbents	A07BC04	Attapulgite	-1
A - Alimentary tract and metabolism	A07 - Antidiarrheals, intestinal antiinflammatory/antiinfective agents	A07B - Intestinal adsorbents	A07BC - Other intestinal adsorbents	A07BC05	Diosmectite	71586775
A - Alimentary tract and metabolism	A07 - Antidiarrheals, intestinal antiinflammatory/antiinfective agents	A07B - Intestinal adsorbents	A07BC - Other intestinal adsorbents	A07BC30	Combinations	-1
A - Alimentary tract and metabolism	A07 - Antidiarrheals, intestinal antiinflammatory/antiinfective agents	A07B - Intestinal adsorbents	A07BC - Other intestinal adsorbents	A07BC54	Attapulgite, combinations	-1
A - Alimentary tract and metabolism	A07 - Antidiarrheals, intestinal antiinflammatory/antiinfective agents	A07D - Antipropulsives	A07DA - Antipropulsives	A07DA01	Diphenoxylate	13505
A - Alimentary tract and metabolism	A07 - Antidiarrheals, intestinal antiinflammatory/antiinfective agents	A07D - Antipropulsives	A07DA - Antipropulsives	A07DA02	Opium	-1
A - Alimentary tract and metabolism	A07 - Antidiarrheals, intestinal antiinflammatory/antiinfective agents	A07D - Antipropulsives	A07DA - Antipropulsives	A07DA03	Loperamide	3955
A - Alimentary tract and metabolism	A07 - Antidiarrheals, intestinal antiinflammatory/antiinfective agents	A07D - Antipropulsives	A07DA - Antipropulsives	A07DA04	Difenoxin	34328
A - Alimentary tract and metabolism	A07 - Antidiarrheals, intestinal antiinflammatory/antiinfective agents	A07D - Antipropulsives	A07DA - Antipropulsives	A07DA05	Loperamide oxide	71421
A - Alimentary tract and metabolism	A07 - Antidiarrheals, intestinal antiinflammatory/antiinfective agents	A07D - Antipropulsives	A07DA - Antipropulsives	A07DA06	Eluxadoline	11250029
A - Alimentary tract and metabolism	A07 - Antidiarrheals, intestinal antiinflammatory/antiinfective agents	A07D - Antipropulsives	A07DA - Antipropulsives	A07DA52	Morphine, combinations	-1
A - Alimentary tract and metabolism	A07 - Antidiarrheals, intestinal antiinflammatory/antiinfective agents	A07D - Antipropulsives	A07DA - Antipropulsives	A07DA53	Loperamide, combinations	-1
A - Alimentary tract and metabolism	A07 - Antidiarrheals, intestinal antiinflammatory/antiinfective agents	A07E - Intestinal antiinflammatory agents	A07EA - Corticosteroids acting locally	A07EA01	Prednisolone	5755
A - Alimentary tract and metabolism	A07 - Antidiarrheals, intestinal antiinflammatory/antiinfective agents	A07E - Intestinal antiinflammatory agents	A07EA - Corticosteroids acting locally	A07EA02	Hydrocortisone	5754
A - Alimentary tract and metabolism	A07 - Antidiarrheals, intestinal antiinflammatory/antiinfective agents	A07E - Intestinal antiinflammatory agents	A07EA - Corticosteroids acting locally	A07EA03	Prednisone	5865
A - Alimentary tract and metabolism	A07 - Antidiarrheals, intestinal antiinflammatory/antiinfective agents	A07E - Intestinal antiinflammatory agents	A07EA - Corticosteroids acting locally	A07EA04	Betamethasone	9782
A - Alimentary tract and metabolism	A07 - Antidiarrheals, intestinal antiinflammatory/antiinfective agents	A07E - Intestinal antiinflammatory agents	A07EA - Corticosteroids acting locally	A07EA05	Tixocortol	162955
A - Alimentary tract and metabolism	A07 - Antidiarrheals, intestinal antiinflammatory/antiinfective agents	A07E - Intestinal antiinflammatory agents	A07EA - Corticosteroids acting locally	A07EA06	Budesonide	5281004
A - Alimentary tract and metabolism	A07 - Antidiarrheals, intestinal antiinflammatory/antiinfective agents	A07E - Intestinal antiinflammatory agents	A07EA - Corticosteroids acting locally	A07EA07	Beclometasone	20469
A - Alimentary tract and metabolism	A07 - Antidiarrheals, intestinal antiinflammatory/antiinfective agents	A07E - Intestinal antiinflammatory agents	A07EB - Antiallergic agents, excl. corticosteroids	A07EB01	Cromoglicic acid	2882
A - Alimentary tract and metabolism	A07 - Antidiarrheals, intestinal antiinflammatory/antiinfective agents	A07E - Intestinal antiinflammatory agents	A07EC - Aminosalicylic acid and similar agents	A07EC01	Sulfasalazine	5339
A - Alimentary tract and metabolism	A07 - Antidiarrheals, intestinal antiinflammatory/antiinfective agents	A07E - Intestinal antiinflammatory agents	A07EC - Aminosalicylic acid and similar agents	A07EC02	Mesalazine	4075
A - Alimentary tract and metabolism	A07 - Antidiarrheals, intestinal antiinflammatory/antiinfective agents	A07E - Intestinal antiinflammatory agents	A07EC - Aminosalicylic acid and similar agents	A07EC03	Olsalazine	22419
A - Alimentary tract and metabolism	A07 - Antidiarrheals, intestinal antiinflammatory/antiinfective agents	A07E - Intestinal antiinflammatory agents	A07EC - Aminosalicylic acid and similar agents	A07EC04	Balsalazide	54585
A - Alimentary tract and metabolism	A07 - Antidiarrheals, intestinal antiinflammatory/antiinfective agents	A07F - Antidiarrheal microorganisms	A07FA - Antidiarrheal microorganisms	A07FA01	Lactic acid producing organisms	-1
A - Alimentary tract and metabolism	A07 - Antidiarrheals, intestinal antiinflammatory/antiinfective agents	A07F - Antidiarrheal microorganisms	A07FA - Antidiarrheal microorganisms	A07FA02	Saccharomyces boulardii	-1
A - Alimentary tract and metabolism	A07 - Antidiarrheals, intestinal antiinflammatory/antiinfective agents	A07F - Antidiarrheal microorganisms	A07FA - Antidiarrheal microorganisms	A07FA03	Escherichia coli	-1
A - Alimentary tract and metabolism	A07 - Antidiarrheals, intestinal antiinflammatory/antiinfective agents	A07F - Antidiarrheal microorganisms	A07FA - Antidiarrheal microorganisms	A07FA51	Lactic acid producing organisms, combinations	-1
A - Alimentary tract and metabolism	A07 - Antidiarrheals, intestinal antiinflammatory/antiinfective agents	A07X - Other antidiarrheals	A07XA - Other antidiarrheals	A07XA01	Albumin tannate	454
A - Alimentary tract and metabolism	A07 - Antidiarrheals, intestinal antiinflammatory/antiinfective agents	A07X - Other antidiarrheals	A07XA - Other antidiarrheals	A07XA02	Ceratonia	-1
A - Alimentary tract and metabolism	A07 - Antidiarrheals, intestinal antiinflammatory/antiinfective agents	A07X - Other antidiarrheals	A07XA - Other antidiarrheals	A07XA03	Calcium compounds	-1
A - Alimentary tract and metabolism	A07 - Antidiarrheals, intestinal antiinflammatory/antiinfective agents	A07X - Other antidiarrheals	A07XA - Other antidiarrheals	A07XA04	Racecadotril	107751
A - Alimentary tract and metabolism	A07 - Antidiarrheals, intestinal antiinflammatory/antiinfective agents	A07X - Other antidiarrheals	A07XA - Other antidiarrheals	A07XA06	Crofelemer	17397714
A - Alimentary tract and metabolism	A07 - Antidiarrheals, intestinal antiinflammatory/antiinfective agents	A07X - Other antidiarrheals	A07XA - Other antidiarrheals	A07XA51	Albumin tannate, combinations	-1
A - Alimentary tract and metabolism	A08 - Antiobesity preparations, excl. diet products	A08A - Antiobesity preparations, excl. diet products	A08AA - Centrally acting antiobesity products	A08AA01	Phentermine	4771
A - Alimentary tract and metabolism	A08 - Antiobesity preparations, excl. diet products	A08A - Antiobesity preparations, excl. diet products	A08AA - Centrally acting antiobesity products	A08AA02	Fenfluramine	3337
A - Alimentary tract and metabolism	A08 - Antiobesity preparations, excl. diet products	A08A - Antiobesity preparations, excl. diet products	A08AA - Centrally acting antiobesity products	A08AA03	Amfepramone	7029
A - Alimentary tract and metabolism	A08 - Antiobesity preparations, excl. diet products	A08A - Antiobesity preparations, excl. diet products	A08AA - Centrally acting antiobesity products	A08AA04	Dexfenfluramine	66265
A - Alimentary tract and metabolism	A08 - Antiobesity preparations, excl. diet products	A08A - Antiobesity preparations, excl. diet products	A08AA - Centrally acting antiobesity products	A08AA05	Mazindol	4020
A - Alimentary tract and metabolism	A08 - Antiobesity preparations, excl. diet products	A08A - Antiobesity preparations, excl. diet products	A08AA - Centrally acting antiobesity products	A08AA06	Etilamfetamine	9982
A - Alimentary tract and metabolism	A08 - Antiobesity preparations, excl. diet products	A08A - Antiobesity preparations, excl. diet products	A08AA - Centrally acting antiobesity products	A08AA07	Cathine	441457
A - Alimentary tract and metabolism	A08 - Antiobesity preparations, excl. diet products	A08A - Antiobesity preparations, excl. diet products	A08AA - Centrally acting antiobesity products	A08AA08	Clobenzorex	71675
A - Alimentary tract and metabolism	A08 - Antiobesity preparations, excl. diet products	A08A - Antiobesity preparations, excl. diet products	A08AA - Centrally acting antiobesity products	A08AA09	Mefenorex	21777
A - Alimentary tract and metabolism	A08 - Antiobesity preparations, excl. diet products	A08A - Antiobesity preparations, excl. diet products	A08AA - Centrally acting antiobesity products	A08AA10	Sibutramine	5210
A - Alimentary tract and metabolism	A08 - Antiobesity preparations, excl. diet products	A08A - Antiobesity preparations, excl. diet products	A08AA - Centrally acting antiobesity products	A08AA11	Lorcaserin	11658860
A - Alimentary tract and metabolism	A08 - Antiobesity preparations, excl. diet products	A08A - Antiobesity preparations, excl. diet products	A08AA - Centrally acting antiobesity products	A08AA12	Setmelanotide	11993702
A - Alimentary tract and metabolism	A08 - Antiobesity preparations, excl. diet products	A08A - Antiobesity preparations, excl. diet products	A08AA - Centrally acting antiobesity products	A08AA51	Phentermine and topiramate	9848354
A - Alimentary tract and metabolism	A08 - Antiobesity preparations, excl. diet products	A08A - Antiobesity preparations, excl. diet products	A08AA - Centrally acting antiobesity products	A08AA56	Ephedrine, combinations	-1
A - Alimentary tract and metabolism	A08 - Antiobesity preparations, excl. diet products	A08A - Antiobesity preparations, excl. diet products	A08AA - Centrally acting antiobesity products	A08AA62	Bupropion and naltrexone	-1
A - Alimentary tract and metabolism	A08 - Antiobesity preparations, excl. diet products	A08A - Antiobesity preparations, excl. diet products	A08AB - Peripherally acting antiobesity products	A08AB01	Orlistat	3034010
A - Alimentary tract and metabolism	A08 - Antiobesity preparations, excl. diet products	A08A - Antiobesity preparations, excl. diet products	A08AX - Other antiobesity drugs	A08AX01	Rimonabant	104850
A - Alimentary tract and metabolism	A09 - Digestives, incl. enzymes	A09A - Digestives, incl. enzymes	A09AA - Enzyme preparations	A09AA01	Diastase	-1
A - Alimentary tract and metabolism	A09 - Digestives, incl. enzymes	A09A - Digestives, incl. enzymes	A09AA - Enzyme preparations	A09AA02	Multienzymes (lipase, protease etc.)	-1
A - Alimentary tract and metabolism	A09 - Digestives, incl. enzymes	A09A - Digestives, incl. enzymes	A09AA - Enzyme preparations	A09AA03	Pepsin	727
A - Alimentary tract and metabolism	A09 - Digestives, incl. enzymes	A09A - Digestives, incl. enzymes	A09AA - Enzyme preparations	A09AA04	Tilactase	439353
A - Alimentary tract and metabolism	A09 - Digestives, incl. enzymes	A09A - Digestives, incl. enzymes	A09AB - Acid preparations	A09AB01	Glutamic acid hydrochloride	2723891
A - Alimentary tract and metabolism	A09 - Digestives, incl. enzymes	A09A - Digestives, incl. enzymes	A09AB - Acid preparations	A09AB02	Betaine hydrochloride	11545
A - Alimentary tract and metabolism	A09 - Digestives, incl. enzymes	A09A - Digestives, incl. enzymes	A09AB - Acid preparations	A09AB03	Hydrochloric acid	313
A - Alimentary tract and metabolism	A09 - Digestives, incl. enzymes	A09A - Digestives, incl. enzymes	A09AB - Acid preparations	A09AB04	Citric acid	311
A - Alimentary tract and metabolism	A09 - Digestives, incl. enzymes	A09A - Digestives, incl. enzymes	A09AC - Enzyme and acid preparations, combinations	A09AC01	Pepsin and acid preparations	-1
A - Alimentary tract and metabolism	A09 - Digestives, incl. enzymes	A09A - Digestives, incl. enzymes	A09AC - Enzyme and acid preparations, combinations	A09AC02	Multienzymes and acid preparations	-1
A - Alimentary tract and metabolism	A10 - Drugs used in diabetes	A10A - Insulins and analogues	A10AB - Insulins and analogues for injection, fast-acting	A10AB01	Insulin (human)	118984375
A - Alimentary tract and metabolism	A10 - Drugs used in diabetes	A10A - Insulins and analogues	A10AB - Insulins and analogues for injection, fast-acting	A10AB02	Insulin (beef)	-1
A - Alimentary tract and metabolism	A10 - Drugs used in diabetes	A10A - Insulins and analogues	A10AB - Insulins and analogues for injection, fast-acting	A10AB03	Insulin (pork)	-1
A - Alimentary tract and metabolism	A10 - Drugs used in diabetes	A10A - Insulins and analogues	A10AB - Insulins and analogues for injection, fast-acting	A10AB04	Insulin lispro	16132438
A - Alimentary tract and metabolism	A10 - Drugs used in diabetes	A10A - Insulins and analogues	A10AB - Insulins and analogues for injection, fast-acting	A10AB05	Insulin aspart	-1
A - Alimentary tract and metabolism	A10 - Drugs used in diabetes	A10A - Insulins and analogues	A10AB - Insulins and analogues for injection, fast-acting	A10AB06	Insulin glulisine	16136701
A - Alimentary tract and metabolism	A10 - Drugs used in diabetes	A10A - Insulins and analogues	A10AB - Insulins and analogues for injection, fast-acting	A10AB30	Combinations	-1
A - Alimentary tract and metabolism	A10 - Drugs used in diabetes	A10A - Insulins and analogues	A10AC - Insulins and analogues for injection, intermediate-acting	A10AC01	Insulin (human)	118984375
A - Alimentary tract and metabolism	A10 - Drugs used in diabetes	A10A - Insulins and analogues	A10AC - Insulins and analogues for injection, intermediate-acting	A10AC02	Insulin (beef)	-1
A - Alimentary tract and metabolism	A10 - Drugs used in diabetes	A10A - Insulins and analogues	A10AC - Insulins and analogues for injection, intermediate-acting	A10AC03	Insulin (pork)	-1
A - Alimentary tract and metabolism	A10 - Drugs used in diabetes	A10A - Insulins and analogues	A10AC - Insulins and analogues for injection, intermediate-acting	A10AC04	Insulin lispro	16132438
A - Alimentary tract and metabolism	A10 - Drugs used in diabetes	A10A - Insulins and analogues	A10AC - Insulins and analogues for injection, intermediate-acting	A10AC30	Combinations	-1
A - Alimentary tract and metabolism	A10 - Drugs used in diabetes	A10A - Insulins and analogues	A10AD - Insulins and analogues for injection, intermediate- or long-acting combined with fast-acting	A10AD01	Insulin (human)	118984375
A - Alimentary tract and metabolism	A10 - Drugs used in diabetes	A10A - Insulins and analogues	A10AD - Insulins and analogues for injection, intermediate- or long-acting combined with fast-acting	A10AD02	Insulin (beef)	-1
A - Alimentary tract and metabolism	A10 - Drugs used in diabetes	A10A - Insulins and analogues	A10AD - Insulins and analogues for injection, intermediate- or long-acting combined with fast-acting	A10AD03	Insulin (pork)	-1
A - Alimentary tract and metabolism	A10 - Drugs used in diabetes	A10A - Insulins and analogues	A10AD - Insulins and analogues for injection, intermediate- or long-acting combined with fast-acting	A10AD04	Insulin lispro	16132438
A - Alimentary tract and metabolism	A10 - Drugs used in diabetes	A10A - Insulins and analogues	A10AD - Insulins and analogues for injection, intermediate- or long-acting combined with fast-acting	A10AD05	Insulin aspart	-1
A - Alimentary tract and metabolism	A10 - Drugs used in diabetes	A10A - Insulins and analogues	A10AD - Insulins and analogues for injection, intermediate- or long-acting combined with fast-acting	A10AD06	Insulin degludec and insulin aspart	-1
A - Alimentary tract and metabolism	A10 - Drugs used in diabetes	A10A - Insulins and analogues	A10AD - Insulins and analogues for injection, intermediate- or long-acting combined with fast-acting	A10AD30	Combinations	-1
A - Alimentary tract and metabolism	A10 - Drugs used in diabetes	A10A - Insulins and analogues	A10AE - Insulins and analogues for injection, long-acting	A10AE01	Insulin (human)	118984375
A - Alimentary tract and metabolism	A10 - Drugs used in diabetes	A10A - Insulins and analogues	A10AE - Insulins and analogues for injection, long-acting	A10AE02	Insulin (beef)	-1
A - Alimentary tract and metabolism	A10 - Drugs used in diabetes	A10A - Insulins and analogues	A10AE - Insulins and analogues for injection, long-acting	A10AE03	Insulin (pork)	-1
A - Alimentary tract and metabolism	A10 - Drugs used in diabetes	A10A - Insulins and analogues	A10AE - Insulins and analogues for injection, long-acting	A10AE04	Insulin glargine	118984454
A - Alimentary tract and metabolism	A10 - Drugs used in diabetes	A10A - Insulins and analogues	A10AE - Insulins and analogues for injection, long-acting	A10AE05	Insulin detemir	16137271
A - Alimentary tract and metabolism	A10 - Drugs used in diabetes	A10A - Insulins and analogues	A10AE - Insulins and analogues for injection, long-acting	A10AE06	Insulin degludec	118984462
A - Alimentary tract and metabolism	A10 - Drugs used in diabetes	A10A - Insulins and analogues	A10AE - Insulins and analogues for injection, long-acting	A10AE07	Insulin icodec	-1
A - Alimentary tract and metabolism	A10 - Drugs used in diabetes	A10A - Insulins and analogues	A10AE - Insulins and analogues for injection, long-acting	A10AE30	Combinations	-1
A - Alimentary tract and metabolism	A10 - Drugs used in diabetes	A10A - Insulins and analogues	A10AE - Insulins and analogues for injection, long-acting	A10AE54	Insulin glargine and lixisenatide	-1
A - Alimentary tract and metabolism	A10 - Drugs used in diabetes	A10A - Insulins and analogues	A10AE - Insulins and analogues for injection, long-acting	A10AE56	Insulin degludec and liraglutide	-1
A - Alimentary tract and metabolism	A10 - Drugs used in diabetes	A10A - Insulins and analogues	A10AF - Insulins and analogues for inhalation	A10AF01	Insulin (human)	118984375
A - Alimentary tract and metabolism	A10 - Drugs used in diabetes	A10B - Blood glucose lowering drugs, excl. insulins	A10BA - Biguanides	A10BA01	Phenformin	8249
A - Alimentary tract and metabolism	A10 - Drugs used in diabetes	A10B - Blood glucose lowering drugs, excl. insulins	A10BA - Biguanides	A10BA02	Metformin	4091
A - Alimentary tract and metabolism	A10 - Drugs used in diabetes	A10B - Blood glucose lowering drugs, excl. insulins	A10BA - Biguanides	A10BA03	Buformin	2468
A - Alimentary tract and metabolism	A10 - Drugs used in diabetes	A10B - Blood glucose lowering drugs, excl. insulins	A10BB - Sulfonylureas	A10BB01	Glibenclamide	3488
A - Alimentary tract and metabolism	A10 - Drugs used in diabetes	A10B - Blood glucose lowering drugs, excl. insulins	A10BB - Sulfonylureas	A10BB02	Chlorpropamide	2727
A - Alimentary tract and metabolism	A10 - Drugs used in diabetes	A10B - Blood glucose lowering drugs, excl. insulins	A10BB - Sulfonylureas	A10BB03	Tolbutamide	5505
A - Alimentary tract and metabolism	A10 - Drugs used in diabetes	A10B - Blood glucose lowering drugs, excl. insulins	A10BB - Sulfonylureas	A10BB04	Glibornuride	12818200
A - Alimentary tract and metabolism	A10 - Drugs used in diabetes	A10B - Blood glucose lowering drugs, excl. insulins	A10BB - Sulfonylureas	A10BB05	Tolazamide	5503
A - Alimentary tract and metabolism	A10 - Drugs used in diabetes	A10B - Blood glucose lowering drugs, excl. insulins	A10BB - Sulfonylureas	A10BB06	Carbutamide	9564
A - Alimentary tract and metabolism	A10 - Drugs used in diabetes	A10B - Blood glucose lowering drugs, excl. insulins	A10BB - Sulfonylureas	A10BB07	Glipizide	3478
A - Alimentary tract and metabolism	A10 - Drugs used in diabetes	A10B - Blood glucose lowering drugs, excl. insulins	A10BB - Sulfonylureas	A10BB08	Gliquidone	91610
A - Alimentary tract and metabolism	A10 - Drugs used in diabetes	A10B - Blood glucose lowering drugs, excl. insulins	A10BB - Sulfonylureas	A10BB09	Gliclazide	3475
A - Alimentary tract and metabolism	A10 - Drugs used in diabetes	A10B - Blood glucose lowering drugs, excl. insulins	A10BB - Sulfonylureas	A10BB10	Metahexamide	11259
A - Alimentary tract and metabolism	A10 - Drugs used in diabetes	A10B - Blood glucose lowering drugs, excl. insulins	A10BB - Sulfonylureas	A10BB11	Glisoxepide	32778
A - Alimentary tract and metabolism	A10 - Drugs used in diabetes	A10B - Blood glucose lowering drugs, excl. insulins	A10BB - Sulfonylureas	A10BB12	Glimepiride	3476
A - Alimentary tract and metabolism	A10 - Drugs used in diabetes	A10B - Blood glucose lowering drugs, excl. insulins	A10BB - Sulfonylureas	A10BB31	Acetohexamide	1989
A - Alimentary tract and metabolism	A10 - Drugs used in diabetes	A10B - Blood glucose lowering drugs, excl. insulins	A10BC - Sulfonamides (heterocyclic)	A10BC01	Glymidine	9565
A - Alimentary tract and metabolism	A10 - Drugs used in diabetes	A10B - Blood glucose lowering drugs, excl. insulins	A10BD - Combinations of oral blood glucose lowering drugs	A10BD01	Phenformin and sulfonylureas	-1
A - Alimentary tract and metabolism	A10 - Drugs used in diabetes	A10B - Blood glucose lowering drugs, excl. insulins	A10BD - Combinations of oral blood glucose lowering drugs	A10BD02	Metformin and sulfonylureas	-1
A - Alimentary tract and metabolism	A10 - Drugs used in diabetes	A10B - Blood glucose lowering drugs, excl. insulins	A10BD - Combinations of oral blood glucose lowering drugs	A10BD03	Metformin and rosiglitazone	-1
A - Alimentary tract and metabolism	A10 - Drugs used in diabetes	A10B - Blood glucose lowering drugs, excl. insulins	A10BD - Combinations of oral blood glucose lowering drugs	A10BD04	Glimepiride and rosiglitazone	-1
A - Alimentary tract and metabolism	A10 - Drugs used in diabetes	A10B - Blood glucose lowering drugs, excl. insulins	A10BD - Combinations of oral blood glucose lowering drugs	A10BD05	Metformin and pioglitazone	-1
A - Alimentary tract and metabolism	A10 - Drugs used in diabetes	A10B - Blood glucose lowering drugs, excl. insulins	A10BD - Combinations of oral blood glucose lowering drugs	A10BD06	Glimepiride and pioglitazone	-1
A - Alimentary tract and metabolism	A10 - Drugs used in diabetes	A10B - Blood glucose lowering drugs, excl. insulins	A10BD - Combinations of oral blood glucose lowering drugs	A10BD07	Metformin and sitagliptin	-1
A - Alimentary tract and metabolism	A10 - Drugs used in diabetes	A10B - Blood glucose lowering drugs, excl. insulins	A10BD - Combinations of oral blood glucose lowering drugs	A10BD08	Metformin and vildagliptin	-1
A - Alimentary tract and metabolism	A10 - Drugs used in diabetes	A10B - Blood glucose lowering drugs, excl. insulins	A10BD - Combinations of oral blood glucose lowering drugs	A10BD09	Pioglitazone and alogliptin	-1
A - Alimentary tract and metabolism	A10 - Drugs used in diabetes	A10B - Blood glucose lowering drugs, excl. insulins	A10BD - Combinations of oral blood glucose lowering drugs	A10BD10	Metformin and saxagliptin	-1
A - Alimentary tract and metabolism	A10 - Drugs used in diabetes	A10B - Blood glucose lowering drugs, excl. insulins	A10BD - Combinations of oral blood glucose lowering drugs	A10BD11	Metformin and linagliptin	-1
A - Alimentary tract and metabolism	A10 - Drugs used in diabetes	A10B - Blood glucose lowering drugs, excl. insulins	A10BD - Combinations of oral blood glucose lowering drugs	A10BD12	Pioglitazone and sitagliptin	-1
A - Alimentary tract and metabolism	A10 - Drugs used in diabetes	A10B - Blood glucose lowering drugs, excl. insulins	A10BD - Combinations of oral blood glucose lowering drugs	A10BD13	Metformin and alogliptin	-1
A - Alimentary tract and metabolism	A10 - Drugs used in diabetes	A10B - Blood glucose lowering drugs, excl. insulins	A10BD - Combinations of oral blood glucose lowering drugs	A10BD14	Metformin and repaglinide	-1
A - Alimentary tract and metabolism	A10 - Drugs used in diabetes	A10B - Blood glucose lowering drugs, excl. insulins	A10BD - Combinations of oral blood glucose lowering drugs	A10BD15	Metformin and dapagliflozin	-1
A - Alimentary tract and metabolism	A10 - Drugs used in diabetes	A10B - Blood glucose lowering drugs, excl. insulins	A10BD - Combinations of oral blood glucose lowering drugs	A10BD16	Metformin and canagliflozin	-1
A - Alimentary tract and metabolism	A10 - Drugs used in diabetes	A10B - Blood glucose lowering drugs, excl. insulins	A10BD - Combinations of oral blood glucose lowering drugs	A10BD17	Metformin and acarbose	-1
A - Alimentary tract and metabolism	A10 - Drugs used in diabetes	A10B - Blood glucose lowering drugs, excl. insulins	A10BD - Combinations of oral blood glucose lowering drugs	A10BD18	Metformin and gemigliptin	-1
A - Alimentary tract and metabolism	A10 - Drugs used in diabetes	A10B - Blood glucose lowering drugs, excl. insulins	A10BD - Combinations of oral blood glucose lowering drugs	A10BD19	Linagliptin and empagliflozin	85364159
A - Alimentary tract and metabolism	A10 - Drugs used in diabetes	A10B - Blood glucose lowering drugs, excl. insulins	A10BD - Combinations of oral blood glucose lowering drugs	A10BD20	Metformin and empagliflozin	-1
A - Alimentary tract and metabolism	A10 - Drugs used in diabetes	A10B - Blood glucose lowering drugs, excl. insulins	A10BD - Combinations of oral blood glucose lowering drugs	A10BD21	Saxagliptin and dapagliflozin	-1
A - Alimentary tract and metabolism	A10 - Drugs used in diabetes	A10B - Blood glucose lowering drugs, excl. insulins	A10BD - Combinations of oral blood glucose lowering drugs	A10BD22	Metformin and evogliptin	-1
A - Alimentary tract and metabolism	A10 - Drugs used in diabetes	A10B - Blood glucose lowering drugs, excl. insulins	A10BD - Combinations of oral blood glucose lowering drugs	A10BD23	Metformin and ertugliflozin	-1
A - Alimentary tract and metabolism	A10 - Drugs used in diabetes	A10B - Blood glucose lowering drugs, excl. insulins	A10BD - Combinations of oral blood glucose lowering drugs	A10BD24	Sitagliptin and ertugliflozin	-1
A - Alimentary tract and metabolism	A10 - Drugs used in diabetes	A10B - Blood glucose lowering drugs, excl. insulins	A10BD - Combinations of oral blood glucose lowering drugs	A10BD25	Metformin, saxagliptin and dapagliflozin	-1
A - Alimentary tract and metabolism	A10 - Drugs used in diabetes	A10B - Blood glucose lowering drugs, excl. insulins	A10BD - Combinations of oral blood glucose lowering drugs	A10BD26	Metformin and lobeglitazone	-1
A - Alimentary tract and metabolism	A10 - Drugs used in diabetes	A10B - Blood glucose lowering drugs, excl. insulins	A10BD - Combinations of oral blood glucose lowering drugs	A10BD27	Metformin, linagliptin and empagliflozin	-1
A - Alimentary tract and metabolism	A10 - Drugs used in diabetes	A10B - Blood glucose lowering drugs, excl. insulins	A10BD - Combinations of oral blood glucose lowering drugs	A10BD28	Metformin and teneligliptin	-1
A - Alimentary tract and metabolism	A10 - Drugs used in diabetes	A10B - Blood glucose lowering drugs, excl. insulins	A10BD - Combinations of oral blood glucose lowering drugs	A10BD29	Sitagliptin and dapagliflozin	-1
A - Alimentary tract and metabolism	A10 - Drugs used in diabetes	A10B - Blood glucose lowering drugs, excl. insulins	A10BF - Alpha glucosidase inhibitors	A10BF01	Acarbose	41774
A - Alimentary tract and metabolism	A10 - Drugs used in diabetes	A10B - Blood glucose lowering drugs, excl. insulins	A10BF - Alpha glucosidase inhibitors	A10BF02	Miglitol	441314
A - Alimentary tract and metabolism	A10 - Drugs used in diabetes	A10B - Blood glucose lowering drugs, excl. insulins	A10BF - Alpha glucosidase inhibitors	A10BF03	Voglibose	444020
A - Alimentary tract and metabolism	A10 - Drugs used in diabetes	A10B - Blood glucose lowering drugs, excl. insulins	A10BG - Thiazolidinediones	A10BG01	Troglitazone	5591
A - Alimentary tract and metabolism	A10 - Drugs used in diabetes	A10B - Blood glucose lowering drugs, excl. insulins	A10BG - Thiazolidinediones	A10BG02	Rosiglitazone	77999
A - Alimentary tract and metabolism	A10 - Drugs used in diabetes	A10B - Blood glucose lowering drugs, excl. insulins	A10BG - Thiazolidinediones	A10BG03	Pioglitazone	4829
A - Alimentary tract and metabolism	A10 - Drugs used in diabetes	A10B - Blood glucose lowering drugs, excl. insulins	A10BG - Thiazolidinediones	A10BG04	Lobeglitazone	9826451
A - Alimentary tract and metabolism	A10 - Drugs used in diabetes	A10B - Blood glucose lowering drugs, excl. insulins	A10BH - Dipeptidyl peptidase 4 (dpp-4) inhibitors	A10BH01	Sitagliptin	4369359
A - Alimentary tract and metabolism	A10 - Drugs used in diabetes	A10B - Blood glucose lowering drugs, excl. insulins	A10BH - Dipeptidyl peptidase 4 (dpp-4) inhibitors	A10BH02	Vildagliptin	6918537
A - Alimentary tract and metabolism	A10 - Drugs used in diabetes	A10B - Blood glucose lowering drugs, excl. insulins	A10BH - Dipeptidyl peptidase 4 (dpp-4) inhibitors	A10BH03	Saxagliptin	11243969
A - Alimentary tract and metabolism	A10 - Drugs used in diabetes	A10B - Blood glucose lowering drugs, excl. insulins	A10BH - Dipeptidyl peptidase 4 (dpp-4) inhibitors	A10BH04	Alogliptin	11450633
A - Alimentary tract and metabolism	A10 - Drugs used in diabetes	A10B - Blood glucose lowering drugs, excl. insulins	A10BH - Dipeptidyl peptidase 4 (dpp-4) inhibitors	A10BH05	Linagliptin	10096344
A - Alimentary tract and metabolism	A10 - Drugs used in diabetes	A10B - Blood glucose lowering drugs, excl. insulins	A10BH - Dipeptidyl peptidase 4 (dpp-4) inhibitors	A10BH06	Gemigliptin	11953153
A - Alimentary tract and metabolism	A10 - Drugs used in diabetes	A10B - Blood glucose lowering drugs, excl. insulins	A10BH - Dipeptidyl peptidase 4 (dpp-4) inhibitors	A10BH07	Evogliptin	25022354
A - Alimentary tract and metabolism	A10 - Drugs used in diabetes	A10B - Blood glucose lowering drugs, excl. insulins	A10BH - Dipeptidyl peptidase 4 (dpp-4) inhibitors	A10BH08	Teneligliptin	11949652
A - Alimentary tract and metabolism	A10 - Drugs used in diabetes	A10B - Blood glucose lowering drugs, excl. insulins	A10BH - Dipeptidyl peptidase 4 (dpp-4) inhibitors	A10BH51	Sitagliptin and simvastatin	-1
A - Alimentary tract and metabolism	A10 - Drugs used in diabetes	A10B - Blood glucose lowering drugs, excl. insulins	A10BH - Dipeptidyl peptidase 4 (dpp-4) inhibitors	A10BH52	Gemigliptin and rosuvastatin	-1
A - Alimentary tract and metabolism	A10 - Drugs used in diabetes	A10B - Blood glucose lowering drugs, excl. insulins	A10BJ - Glucagon-like peptide-1 (glp-1) analogues	A10BJ01	Exenatide	45588096
A - Alimentary tract and metabolism	A10 - Drugs used in diabetes	A10B - Blood glucose lowering drugs, excl. insulins	A10BJ - Glucagon-like peptide-1 (glp-1) analogues	A10BJ02	Liraglutide	16134956
A - Alimentary tract and metabolism	A10 - Drugs used in diabetes	A10B - Blood glucose lowering drugs, excl. insulins	A10BJ - Glucagon-like peptide-1 (glp-1) analogues	A10BJ03	Lixisenatide	90472060
A - Alimentary tract and metabolism	A10 - Drugs used in diabetes	A10B - Blood glucose lowering drugs, excl. insulins	A10BJ - Glucagon-like peptide-1 (glp-1) analogues	A10BJ04	Albiglutide	145994868
A - Alimentary tract and metabolism	A10 - Drugs used in diabetes	A10B - Blood glucose lowering drugs, excl. insulins	A10BJ - Glucagon-like peptide-1 (glp-1) analogues	A10BJ05	Dulaglutide	171042928
A - Alimentary tract and metabolism	A10 - Drugs used in diabetes	A10B - Blood glucose lowering drugs, excl. insulins	A10BJ - Glucagon-like peptide-1 (glp-1) analogues	A10BJ06	Semaglutide	56843331
A - Alimentary tract and metabolism	A10 - Drugs used in diabetes	A10B - Blood glucose lowering drugs, excl. insulins	A10BJ - Glucagon-like peptide-1 (glp-1) analogues	A10BJ07	Beinaglutide	131801470
A - Alimentary tract and metabolism	A10 - Drugs used in diabetes	A10B - Blood glucose lowering drugs, excl. insulins	A10BK - Sodium-glucose co-transporter 2 (sglt2) inhibitors	A10BK01	Dapagliflozin	9887712
A - Alimentary tract and metabolism	A10 - Drugs used in diabetes	A10B - Blood glucose lowering drugs, excl. insulins	A10BK - Sodium-glucose co-transporter 2 (sglt2) inhibitors	A10BK02	Canagliflozin	24812758
A - Alimentary tract and metabolism	A10 - Drugs used in diabetes	A10B - Blood glucose lowering drugs, excl. insulins	A10BK - Sodium-glucose co-transporter 2 (sglt2) inhibitors	A10BK03	Empagliflozin	11949646
A - Alimentary tract and metabolism	A10 - Drugs used in diabetes	A10B - Blood glucose lowering drugs, excl. insulins	A10BK - Sodium-glucose co-transporter 2 (sglt2) inhibitors	A10BK04	Ertugliflozin	44814423
A - Alimentary tract and metabolism	A10 - Drugs used in diabetes	A10B - Blood glucose lowering drugs, excl. insulins	A10BK - Sodium-glucose co-transporter 2 (sglt2) inhibitors	A10BK05	Ipragliflozin	10453870
A - Alimentary tract and metabolism	A10 - Drugs used in diabetes	A10B - Blood glucose lowering drugs, excl. insulins	A10BK - Sodium-glucose co-transporter 2 (sglt2) inhibitors	A10BK06	Sotagliflozin	24831714
A - Alimentary tract and metabolism	A10 - Drugs used in diabetes	A10B - Blood glucose lowering drugs, excl. insulins	A10BK - Sodium-glucose co-transporter 2 (sglt2) inhibitors	A10BK07	Luseogliflozin	11988953
A - Alimentary tract and metabolism	A10 - Drugs used in diabetes	A10B - Blood glucose lowering drugs, excl. insulins	A10BK - Sodium-glucose co-transporter 2 (sglt2) inhibitors	A10BK08	Bexagliflozin	25195624
A - Alimentary tract and metabolism	A10 - Drugs used in diabetes	A10B - Blood glucose lowering drugs, excl. insulins	A10BX - Other blood glucose lowering drugs, excl. insulins	A10BX01	Guar gum	-1
A - Alimentary tract and metabolism	A10 - Drugs used in diabetes	A10B - Blood glucose lowering drugs, excl. insulins	A10BX - Other blood glucose lowering drugs, excl. insulins	A10BX02	Repaglinide	65981
A - Alimentary tract and metabolism	A10 - Drugs used in diabetes	A10B - Blood glucose lowering drugs, excl. insulins	A10BX - Other blood glucose lowering drugs, excl. insulins	A10BX03	Nateglinide	5311309
A - Alimentary tract and metabolism	A10 - Drugs used in diabetes	A10B - Blood glucose lowering drugs, excl. insulins	A10BX - Other blood glucose lowering drugs, excl. insulins	A10BX05	Pramlintide	70691388
A - Alimentary tract and metabolism	A10 - Drugs used in diabetes	A10B - Blood glucose lowering drugs, excl. insulins	A10BX - Other blood glucose lowering drugs, excl. insulins	A10BX06	Benfluorex	2318
A - Alimentary tract and metabolism	A10 - Drugs used in diabetes	A10B - Blood glucose lowering drugs, excl. insulins	A10BX - Other blood glucose lowering drugs, excl. insulins	A10BX08	Mitiglinide	121891
A - Alimentary tract and metabolism	A10 - Drugs used in diabetes	A10B - Blood glucose lowering drugs, excl. insulins	A10BX - Other blood glucose lowering drugs, excl. insulins	A10BX15	Imeglimin	24812808
A - Alimentary tract and metabolism	A10 - Drugs used in diabetes	A10B - Blood glucose lowering drugs, excl. insulins	A10BX - Other blood glucose lowering drugs, excl. insulins	A10BX16	Tirzepatide	168009818
A - Alimentary tract and metabolism	A10 - Drugs used in diabetes	A10B - Blood glucose lowering drugs, excl. insulins	A10BX - Other blood glucose lowering drugs, excl. insulins	A10BX17	Carfloglitazar	9938010
A - Alimentary tract and metabolism	A10 - Drugs used in diabetes	A10B - Blood glucose lowering drugs, excl. insulins	A10BX - Other blood glucose lowering drugs, excl. insulins	A10BX18	Dorzagliatin	57920094
A - Alimentary tract and metabolism	A10 - Drugs used in diabetes	A10X - Other drugs used in diabetes	A10XA - Aldose reductase inhibitors	A10XA01	Tolrestat	53359
A - Alimentary tract and metabolism	A10 - Drugs used in diabetes	A10X - Other drugs used in diabetes	A10XX - Other drugs used in diabetes	A10XX01	Teplizumab	-1
A - Alimentary tract and metabolism	A11 - Vitamins	A11A - Multivitamins, combinations	A11AA - Multivitamins with minerals	A11AA01	Multivitamins and iron	-1
A - Alimentary tract and metabolism	A11 - Vitamins	A11A - Multivitamins, combinations	A11AA - Multivitamins with minerals	A11AA02	Multivitamins and calcium	-1
A - Alimentary tract and metabolism	A11 - Vitamins	A11A - Multivitamins, combinations	A11AA - Multivitamins with minerals	A11AA03	Multivitamins and other minerals, incl. combinations	-1
A - Alimentary tract and metabolism	A11 - Vitamins	A11A - Multivitamins, combinations	A11AA - Multivitamins with minerals	A11AA04	Multivitamins and trace elements	-1
A - Alimentary tract and metabolism	A11 - Vitamins	A11C - Vitamin a and d, incl. combinations of the two	A11CA - Vitamin a, plain	A11CA01	Retinol (vit A)	445354
A - Alimentary tract and metabolism	A11 - Vitamins	A11C - Vitamin a and d, incl. combinations of the two	A11CA - Vitamin a, plain	A11CA02	Betacarotene	5280489
A - Alimentary tract and metabolism	A11 - Vitamins	A11C - Vitamin a and d, incl. combinations of the two	A11CC - Vitamin d and analogues	A11CC01	Ergocalciferol	5280793
A - Alimentary tract and metabolism	A11 - Vitamins	A11C - Vitamin a and d, incl. combinations of the two	A11CC - Vitamin d and analogues	A11CC02	Dihydrotachysterol	5311071
A - Alimentary tract and metabolism	A11 - Vitamins	A11C - Vitamin a and d, incl. combinations of the two	A11CC - Vitamin d and analogues	A11CC03	Alfacalcidol	5282181
A - Alimentary tract and metabolism	A11 - Vitamins	A11C - Vitamin a and d, incl. combinations of the two	A11CC - Vitamin d and analogues	A11CC04	Calcitriol	5280453
A - Alimentary tract and metabolism	A11 - Vitamins	A11C - Vitamin a and d, incl. combinations of the two	A11CC - Vitamin d and analogues	A11CC05	Colecalciferol	5280795
A - Alimentary tract and metabolism	A11 - Vitamins	A11C - Vitamin a and d, incl. combinations of the two	A11CC - Vitamin d and analogues	A11CC06	Calcifediol	5283731
A - Alimentary tract and metabolism	A11 - Vitamins	A11C - Vitamin a and d, incl. combinations of the two	A11CC - Vitamin d and analogues	A11CC20	Combinations	-1
A - Alimentary tract and metabolism	A11 - Vitamins	A11C - Vitamin a and d, incl. combinations of the two	A11CC - Vitamin d and analogues	A11CC55	Colecalciferol, combinations	-1
A - Alimentary tract and metabolism	A11 - Vitamins	A11D - Vitamin b1, plain and in combination with vitamin b6 and b12	A11DA - Vitamin b1, plain	A11DA01	Thiamine (vit B1)	1130
A - Alimentary tract and metabolism	A11 - Vitamins	A11D - Vitamin b1, plain and in combination with vitamin b6 and b12	A11DA - Vitamin b1, plain	A11DA02	Sulbutiamine	20055424
A - Alimentary tract and metabolism	A11 - Vitamins	A11D - Vitamin b1, plain and in combination with vitamin b6 and b12	A11DA - Vitamin b1, plain	A11DA03	Benfotiamine	5282168
A - Alimentary tract and metabolism	A11 - Vitamins	A11G - Ascorbic acid (vitamin c), incl. combinations	A11GA - Ascorbic acid (vitamin c), plain	A11GA01	Ascorbic acid (vit C)	54670067
A - Alimentary tract and metabolism	A11 - Vitamins	A11G - Ascorbic acid (vitamin c), incl. combinations	A11GB - Ascorbic acid (vitamin c), combinations	A11GB01	Ascorbic acid (vit C) and calcium	-1
A - Alimentary tract and metabolism	A11 - Vitamins	A11H - Other plain vitamin preparations	A11HA - Other plain vitamin preparations	A11HA01	Nicotinamide	936
A - Alimentary tract and metabolism	A11 - Vitamins	A11H - Other plain vitamin preparations	A11HA - Other plain vitamin preparations	A11HA02	Pyridoxine (vit B6)	1054
A - Alimentary tract and metabolism	A11 - Vitamins	A11H - Other plain vitamin preparations	A11HA - Other plain vitamin preparations	A11HA03	Tocopherol (vit E)	-1
A - Alimentary tract and metabolism	A11 - Vitamins	A11H - Other plain vitamin preparations	A11HA - Other plain vitamin preparations	A11HA04	Riboflavin (vit B2)	493570
A - Alimentary tract and metabolism	A11 - Vitamins	A11H - Other plain vitamin preparations	A11HA - Other plain vitamin preparations	A11HA05	Biotin	171548
A - Alimentary tract and metabolism	A11 - Vitamins	A11H - Other plain vitamin preparations	A11HA - Other plain vitamin preparations	A11HA06	Pyridoxal phosphate	1051
A - Alimentary tract and metabolism	A11 - Vitamins	A11H - Other plain vitamin preparations	A11HA - Other plain vitamin preparations	A11HA07	Inositol	892
A - Alimentary tract and metabolism	A11 - Vitamins	A11H - Other plain vitamin preparations	A11HA - Other plain vitamin preparations	A11HA08	Tocofersolan	71406
A - Alimentary tract and metabolism	A11 - Vitamins	A11H - Other plain vitamin preparations	A11HA - Other plain vitamin preparations	A11HA30	Dexpanthenol	131204
A - Alimentary tract and metabolism	A11 - Vitamins	A11H - Other plain vitamin preparations	A11HA - Other plain vitamin preparations	A11HA31	Calcium pantothenate	443753
A - Alimentary tract and metabolism	A11 - Vitamins	A11H - Other plain vitamin preparations	A11HA - Other plain vitamin preparations	A11HA32	Pantethine	452306
A - Alimentary tract and metabolism	A12 - Mineral supplements	A12A - Calcium	A12AA - Calcium	A12AA01	Calcium phosphate	24456
A - Alimentary tract and metabolism	A12 - Mineral supplements	A12A - Calcium	A12AA - Calcium	A12AA02	Calcium glubionate	25557
A - Alimentary tract and metabolism	A12 - Mineral supplements	A12A - Calcium	A12AA - Calcium	A12AA03	Calcium gluconate	9290
A - Alimentary tract and metabolism	A12 - Mineral supplements	A12A - Calcium	A12AA - Calcium	A12AA04	Calcium carbonate	10112
A - Alimentary tract and metabolism	A12 - Mineral supplements	A12A - Calcium	A12AA - Calcium	A12AA05	Calcium lactate	13144
A - Alimentary tract and metabolism	A12 - Mineral supplements	A12A - Calcium	A12AA - Calcium	A12AA06	Calcium lactate gluconate	92237
A - Alimentary tract and metabolism	A12 - Mineral supplements	A12A - Calcium	A12AA - Calcium	A12AA07	Calcium chloride	5284359
A - Alimentary tract and metabolism	A12 - Mineral supplements	A12A - Calcium	A12AA - Calcium	A12AA08	Calcium glycerylphosphate	62820
A - Alimentary tract and metabolism	A12 - Mineral supplements	A12A - Calcium	A12AA - Calcium	A12AA09	Calcium citrate lysine complex	-1
A - Alimentary tract and metabolism	A12 - Mineral supplements	A12A - Calcium	A12AA - Calcium	A12AA10	Calcium glucoheptonate	62859
A - Alimentary tract and metabolism	A12 - Mineral supplements	A12A - Calcium	A12AA - Calcium	A12AA11	Calcium pangamate	76966485
A - Alimentary tract and metabolism	A12 - Mineral supplements	A12A - Calcium	A12AA - Calcium	A12AA13	Calcium citrate	13136
A - Alimentary tract and metabolism	A12 - Mineral supplements	A12A - Calcium	A12AA - Calcium	A12AA20	Calcium (different salts in combination)	-1
A - Alimentary tract and metabolism	A12 - Mineral supplements	A12A - Calcium	A12AA - Calcium	A12AA30	Calcium laevulate	11578
A - Alimentary tract and metabolism	A12 - Mineral supplements	A12B - Potassium	A12BA - Potassium	A12BA01	Potassium chloride	4873
A - Alimentary tract and metabolism	A12 - Mineral supplements	A12B - Potassium	A12BA - Potassium	A12BA02	Potassium citrate	13344
A - Alimentary tract and metabolism	A12 - Mineral supplements	A12B - Potassium	A12BA - Potassium	A12BA03	Potassium hydrogentartrate	23666342
A - Alimentary tract and metabolism	A12 - Mineral supplements	A12B - Potassium	A12BA - Potassium	A12BA04	Potassium hydrogencarbonate	516893
A - Alimentary tract and metabolism	A12 - Mineral supplements	A12B - Potassium	A12BA - Potassium	A12BA05	Potassium gluconate	16760467
A - Alimentary tract and metabolism	A12 - Mineral supplements	A12B - Potassium	A12BA - Potassium	A12BA30	Potassium (different salts in combination)	-1
A - Alimentary tract and metabolism	A12 - Mineral supplements	A12B - Potassium	A12BA - Potassium	A12BA51	Potassium chloride, combinations	-1
A - Alimentary tract and metabolism	A12 - Mineral supplements	A12C - Other mineral supplements	A12CA - Sodium	A12CA01	Sodium chloride	5234
A - Alimentary tract and metabolism	A12 - Mineral supplements	A12C - Other mineral supplements	A12CA - Sodium	A12CA02	Sodium sulfate	24436
A - Alimentary tract and metabolism	A12 - Mineral supplements	A12C - Other mineral supplements	A12CB - Zinc	A12CB01	Zinc sulfate	24424
A - Alimentary tract and metabolism	A12 - Mineral supplements	A12C - Other mineral supplements	A12CB - Zinc	A12CB02	Zinc gluconate	443445
A - Alimentary tract and metabolism	A12 - Mineral supplements	A12C - Other mineral supplements	A12CB - Zinc	A12CB03	Zinc protein complex	-1
A - Alimentary tract and metabolism	A12 - Mineral supplements	A12C - Other mineral supplements	A12CC - Magnesium	A12CC01	Magnesium chloride	5360315
A - Alimentary tract and metabolism	A12 - Mineral supplements	A12C - Other mineral supplements	A12CC - Magnesium	A12CC02	Magnesium sulfate	24083
A - Alimentary tract and metabolism	A12 - Mineral supplements	A12C - Other mineral supplements	A12CC - Magnesium	A12CC03	Magnesium gluconate	11418570
A - Alimentary tract and metabolism	A12 - Mineral supplements	A12C - Other mineral supplements	A12CC - Magnesium	A12CC04	Magnesium citrate	6099959
A - Alimentary tract and metabolism	A12 - Mineral supplements	A12C - Other mineral supplements	A12CC - Magnesium	A12CC05	Magnesium aspartate	92912
A - Alimentary tract and metabolism	A12 - Mineral supplements	A12C - Other mineral supplements	A12CC - Magnesium	A12CC06	Magnesium lactate	6536825
A - Alimentary tract and metabolism	A12 - Mineral supplements	A12C - Other mineral supplements	A12CC - Magnesium	A12CC07	Magnesium levulinate	11586912
A - Alimentary tract and metabolism	A12 - Mineral supplements	A12C - Other mineral supplements	A12CC - Magnesium	A12CC08	Magnesium pidolate	18601084
A - Alimentary tract and metabolism	A12 - Mineral supplements	A12C - Other mineral supplements	A12CC - Magnesium	A12CC09	Magnesium orotate	3036905
A - Alimentary tract and metabolism	A12 - Mineral supplements	A12C - Other mineral supplements	A12CC - Magnesium	A12CC10	Magnesium oxide	14792
A - Alimentary tract and metabolism	A12 - Mineral supplements	A12C - Other mineral supplements	A12CC - Magnesium	A12CC30	Magnesium (different salts in combination)	-1
A - Alimentary tract and metabolism	A12 - Mineral supplements	A12C - Other mineral supplements	A12CD - Fluoride	A12CD01	Sodium fluoride	5235
A - Alimentary tract and metabolism	A12 - Mineral supplements	A12C - Other mineral supplements	A12CD - Fluoride	A12CD02	Sodium monofluorophosphate	24266
A - Alimentary tract and metabolism	A12 - Mineral supplements	A12C - Other mineral supplements	A12CD - Fluoride	A12CD51	Fluoride, combinations	-1
A - Alimentary tract and metabolism	A12 - Mineral supplements	A12C - Other mineral supplements	A12CE - Selenium	A12CE01	Sodium selenate	25960
A - Alimentary tract and metabolism	A12 - Mineral supplements	A12C - Other mineral supplements	A12CE - Selenium	A12CE02	Sodium selenite	24934
A - Alimentary tract and metabolism	A14 - Anabolic agents for systemic use	A14A - Anabolic steroids	A14AA - Androstan derivatives	A14AA01	Androstanolone	10635
A - Alimentary tract and metabolism	A14 - Anabolic agents for systemic use	A14A - Anabolic steroids	A14AA - Androstan derivatives	A14AA02	Stanozolol	25249
A - Alimentary tract and metabolism	A14 - Anabolic agents for systemic use	A14A - Anabolic steroids	A14AA - Androstan derivatives	A14AA03	Metandienone	6300
A - Alimentary tract and metabolism	A14 - Anabolic agents for systemic use	A14A - Anabolic steroids	A14AA - Androstan derivatives	A14AA04	Metenolone	3037705
A - Alimentary tract and metabolism	A14 - Anabolic agents for systemic use	A14A - Anabolic steroids	A14AA - Androstan derivatives	A14AA05	Oxymetholone	5281034
A - Alimentary tract and metabolism	A14 - Anabolic agents for systemic use	A14A - Anabolic steroids	A14AA - Androstan derivatives	A14AA06	Quinbolone	10360683
A - Alimentary tract and metabolism	A14 - Anabolic agents for systemic use	A14A - Anabolic steroids	A14AA - Androstan derivatives	A14AA07	Prasterone	5881
A - Alimentary tract and metabolism	A14 - Anabolic agents for systemic use	A14A - Anabolic steroids	A14AA - Androstan derivatives	A14AA08	Oxandrolone	5878
A - Alimentary tract and metabolism	A14 - Anabolic agents for systemic use	A14A - Anabolic steroids	A14AA - Androstan derivatives	A14AA09	Norethandrolone	5858
A - Alimentary tract and metabolism	A14 - Anabolic agents for systemic use	A14A - Anabolic steroids	A14AB - Estren derivatives	A14AB01	Nandrolone	9904
A - Alimentary tract and metabolism	A14 - Anabolic agents for systemic use	A14A - Anabolic steroids	A14AB - Estren derivatives	A14AB02	Ethylestrenol	13765
A - Alimentary tract and metabolism	A14 - Anabolic agents for systemic use	A14A - Anabolic steroids	A14AB - Estren derivatives	A14AB03	Oxabolone cipionate	68952
A - Alimentary tract and metabolism	A16 - Other alimentary tract and metabolism products	A16A - Other alimentary tract and metabolism products	A16AA - Amino acids and derivatives	A16AA01	Levocarnitine	10917
A - Alimentary tract and metabolism	A16 - Other alimentary tract and metabolism products	A16A - Other alimentary tract and metabolism products	A16AA - Amino acids and derivatives	A16AA02	Ademetionine	34755
A - Alimentary tract and metabolism	A16 - Other alimentary tract and metabolism products	A16A - Other alimentary tract and metabolism products	A16AA - Amino acids and derivatives	A16AA03	Glutamine	5961
A - Alimentary tract and metabolism	A16 - Other alimentary tract and metabolism products	A16A - Other alimentary tract and metabolism products	A16AA - Amino acids and derivatives	A16AA04	Mercaptamine	6058
A - Alimentary tract and metabolism	A16 - Other alimentary tract and metabolism products	A16A - Other alimentary tract and metabolism products	A16AA - Amino acids and derivatives	A16AA05	Carglumic acid	121396
A - Alimentary tract and metabolism	A16 - Other alimentary tract and metabolism products	A16A - Other alimentary tract and metabolism products	A16AA - Amino acids and derivatives	A16AA06	Betaine	247
A - Alimentary tract and metabolism	A16 - Other alimentary tract and metabolism products	A16A - Other alimentary tract and metabolism products	A16AA - Amino acids and derivatives	A16AA07	Metreleptin	-1
A - Alimentary tract and metabolism	A16 - Other alimentary tract and metabolism products	A16A - Other alimentary tract and metabolism products	A16AB - Enzymes	A16AB01	Alglucerase	-1
A - Alimentary tract and metabolism	A16 - Other alimentary tract and metabolism products	A16A - Other alimentary tract and metabolism products	A16AB - Enzymes	A16AB02	Imiglucerase	-1
A - Alimentary tract and metabolism	A16 - Other alimentary tract and metabolism products	A16A - Other alimentary tract and metabolism products	A16AB - Enzymes	A16AB03	Agalsidase alfa	52918379
A - Alimentary tract and metabolism	A16 - Other alimentary tract and metabolism products	A16A - Other alimentary tract and metabolism products	A16AB - Enzymes	A16AB04	Agalsidase beta	52918379
A - Alimentary tract and metabolism	A16 - Other alimentary tract and metabolism products	A16A - Other alimentary tract and metabolism products	A16AB - Enzymes	A16AB05	Laronidase	-1
A - Alimentary tract and metabolism	A16 - Other alimentary tract and metabolism products	A16A - Other alimentary tract and metabolism products	A16AB - Enzymes	A16AB06	Sacrosidase	-1
A - Alimentary tract and metabolism	A16 - Other alimentary tract and metabolism products	A16A - Other alimentary tract and metabolism products	A16AB - Enzymes	A16AB07	Alglucosidase alfa	-1
A - Alimentary tract and metabolism	A16 - Other alimentary tract and metabolism products	A16A - Other alimentary tract and metabolism products	A16AB - Enzymes	A16AB08	Galsulfase	-1
A - Alimentary tract and metabolism	A16 - Other alimentary tract and metabolism products	A16A - Other alimentary tract and metabolism products	A16AB - Enzymes	A16AB09	Idursulfase	-1
A - Alimentary tract and metabolism	A16 - Other alimentary tract and metabolism products	A16A - Other alimentary tract and metabolism products	A16AB - Enzymes	A16AB10	Velaglucerase alfa	-1
A - Alimentary tract and metabolism	A16 - Other alimentary tract and metabolism products	A16A - Other alimentary tract and metabolism products	A16AB - Enzymes	A16AB11	Taliglucerase alfa	-1
A - Alimentary tract and metabolism	A16 - Other alimentary tract and metabolism products	A16A - Other alimentary tract and metabolism products	A16AB - Enzymes	A16AB12	Elosulfase alfa	-1
A - Alimentary tract and metabolism	A16 - Other alimentary tract and metabolism products	A16A - Other alimentary tract and metabolism products	A16AB - Enzymes	A16AB13	Asfotase alfa	-1
A - Alimentary tract and metabolism	A16 - Other alimentary tract and metabolism products	A16A - Other alimentary tract and metabolism products	A16AB - Enzymes	A16AB14	Sebelipase alfa	-1
A - Alimentary tract and metabolism	A16 - Other alimentary tract and metabolism products	A16A - Other alimentary tract and metabolism products	A16AB - Enzymes	A16AB15	Velmanase alfa	32051
A - Alimentary tract and metabolism	A16 - Other alimentary tract and metabolism products	A16A - Other alimentary tract and metabolism products	A16AB - Enzymes	A16AB16	Idursulfase beta	-1
A - Alimentary tract and metabolism	A16 - Other alimentary tract and metabolism products	A16A - Other alimentary tract and metabolism products	A16AB - Enzymes	A16AB17	Cerliponase alfa	-1
A - Alimentary tract and metabolism	A16 - Other alimentary tract and metabolism products	A16A - Other alimentary tract and metabolism products	A16AB - Enzymes	A16AB18	Vestronidase alfa	-1
A - Alimentary tract and metabolism	A16 - Other alimentary tract and metabolism products	A16A - Other alimentary tract and metabolism products	A16AB - Enzymes	A16AB19	Pegvaliase	86278362
A - Alimentary tract and metabolism	A16 - Other alimentary tract and metabolism products	A16A - Other alimentary tract and metabolism products	A16AB - Enzymes	A16AB20	Pegunigalsidase alfa	121488171
A - Alimentary tract and metabolism	A16 - Other alimentary tract and metabolism products	A16A - Other alimentary tract and metabolism products	A16AB - Enzymes	A16AB21	Atidarsagene autotemcel	-1
A - Alimentary tract and metabolism	A16 - Other alimentary tract and metabolism products	A16A - Other alimentary tract and metabolism products	A16AB - Enzymes	A16AB22	Avalglucosidase alfa	-1
A - Alimentary tract and metabolism	A16 - Other alimentary tract and metabolism products	A16A - Other alimentary tract and metabolism products	A16AB - Enzymes	A16AB23	Cipaglucosidase alfa	-1
A - Alimentary tract and metabolism	A16 - Other alimentary tract and metabolism products	A16A - Other alimentary tract and metabolism products	A16AB - Enzymes	A16AB24	Pegzilarginase	-1
A - Alimentary tract and metabolism	A16 - Other alimentary tract and metabolism products	A16A - Other alimentary tract and metabolism products	A16AB - Enzymes	A16AB25	Olipudase alfa	-1
A - Alimentary tract and metabolism	A16 - Other alimentary tract and metabolism products	A16A - Other alimentary tract and metabolism products	A16AB - Enzymes	A16AB26	Eladocagene exuparvovec	-1
A - Alimentary tract and metabolism	A16 - Other alimentary tract and metabolism products	A16A - Other alimentary tract and metabolism products	A16AB - Enzymes	A16AB27	Pabinafusp alfa	-1
A - Alimentary tract and metabolism	A16 - Other alimentary tract and metabolism products	A16A - Other alimentary tract and metabolism products	A16AX - Various alimentary tract and metabolism products	A16AX01	Thioctic acid	864
A - Alimentary tract and metabolism	A16 - Other alimentary tract and metabolism products	A16A - Other alimentary tract and metabolism products	A16AX - Various alimentary tract and metabolism products	A16AX02	Anethole trithione	2194
A - Alimentary tract and metabolism	A16 - Other alimentary tract and metabolism products	A16A - Other alimentary tract and metabolism products	A16AX - Various alimentary tract and metabolism products	A16AX03	Sodium phenylbutyrate	5258
A - Alimentary tract and metabolism	A16 - Other alimentary tract and metabolism products	A16A - Other alimentary tract and metabolism products	A16AX - Various alimentary tract and metabolism products	A16AX04	Nitisinone	115355
A - Alimentary tract and metabolism	A16 - Other alimentary tract and metabolism products	A16A - Other alimentary tract and metabolism products	A16AX - Various alimentary tract and metabolism products	A16AX05	Zinc acetate	11192
A - Alimentary tract and metabolism	A16 - Other alimentary tract and metabolism products	A16A - Other alimentary tract and metabolism products	A16AX - Various alimentary tract and metabolism products	A16AX06	Miglustat	51634
A - Alimentary tract and metabolism	A16 - Other alimentary tract and metabolism products	A16A - Other alimentary tract and metabolism products	A16AX - Various alimentary tract and metabolism products	A16AX07	Sapropterin	135398654
A - Alimentary tract and metabolism	A16 - Other alimentary tract and metabolism products	A16A - Other alimentary tract and metabolism products	A16AX - Various alimentary tract and metabolism products	A16AX08	Teduglutide	16139605
A - Alimentary tract and metabolism	A16 - Other alimentary tract and metabolism products	A16A - Other alimentary tract and metabolism products	A16AX - Various alimentary tract and metabolism products	A16AX09	Glycerol phenylbutyrate	10482134
A - Alimentary tract and metabolism	A16 - Other alimentary tract and metabolism products	A16A - Other alimentary tract and metabolism products	A16AX - Various alimentary tract and metabolism products	A16AX10	Eliglustat	23652731
A - Alimentary tract and metabolism	A16 - Other alimentary tract and metabolism products	A16A - Other alimentary tract and metabolism products	A16AX - Various alimentary tract and metabolism products	A16AX11	Sodium benzoate	517055
A - Alimentary tract and metabolism	A16 - Other alimentary tract and metabolism products	A16A - Other alimentary tract and metabolism products	A16AX - Various alimentary tract and metabolism products	A16AX12	Trientine	5565
A - Alimentary tract and metabolism	A16 - Other alimentary tract and metabolism products	A16A - Other alimentary tract and metabolism products	A16AX - Various alimentary tract and metabolism products	A16AX13	Uridine triacetate	20058
A - Alimentary tract and metabolism	A16 - Other alimentary tract and metabolism products	A16A - Other alimentary tract and metabolism products	A16AX - Various alimentary tract and metabolism products	A16AX14	Migalastat	176077
A - Alimentary tract and metabolism	A16 - Other alimentary tract and metabolism products	A16A - Other alimentary tract and metabolism products	A16AX - Various alimentary tract and metabolism products	A16AX15	Telotristat	25025298
A - Alimentary tract and metabolism	A16 - Other alimentary tract and metabolism products	A16A - Other alimentary tract and metabolism products	A16AX - Various alimentary tract and metabolism products	A16AX16	Givosiran	156323004
A - Alimentary tract and metabolism	A16 - Other alimentary tract and metabolism products	A16A - Other alimentary tract and metabolism products	A16AX - Various alimentary tract and metabolism products	A16AX17	Triheptanoin	69286
A - Alimentary tract and metabolism	A16 - Other alimentary tract and metabolism products	A16A - Other alimentary tract and metabolism products	A16AX - Various alimentary tract and metabolism products	A16AX18	Lumasiran	-1
A - Alimentary tract and metabolism	A16 - Other alimentary tract and metabolism products	A16A - Other alimentary tract and metabolism products	A16AX - Various alimentary tract and metabolism products	A16AX19	Fosdenopterin	135463437
A - Alimentary tract and metabolism	A16 - Other alimentary tract and metabolism products	A16A - Other alimentary tract and metabolism products	A16AX - Various alimentary tract and metabolism products	A16AX20	Lonafarnib	148195
A - Alimentary tract and metabolism	A16 - Other alimentary tract and metabolism products	A16A - Other alimentary tract and metabolism products	A16AX - Various alimentary tract and metabolism products	A16AX21	Elivaldogene autotemcel	-1
A - Alimentary tract and metabolism	A16 - Other alimentary tract and metabolism products	A16A - Other alimentary tract and metabolism products	A16AX - Various alimentary tract and metabolism products	A16AX22	Tiomolibdic acid	4660425
A - Alimentary tract and metabolism	A16 - Other alimentary tract and metabolism products	A16A - Other alimentary tract and metabolism products	A16AX - Various alimentary tract and metabolism products	A16AX23	Leriglitazone	4147757
A - Alimentary tract and metabolism	A16 - Other alimentary tract and metabolism products	A16A - Other alimentary tract and metabolism products	A16AX - Various alimentary tract and metabolism products	A16AX30	Sodium benzoate and sodium phenylacetate	24847771
B - Blood and blood forming organs	B01 - Antithrombotic agents	B01A - Antithrombotic agents	B01AA - Vitamin k antagonists	B01AA01	Dicoumarol	54676038
B - Blood and blood forming organs	B01 - Antithrombotic agents	B01A - Antithrombotic agents	B01AA - Vitamin k antagonists	B01AA02	Phenindione	4760
B - Blood and blood forming organs	B01 - Antithrombotic agents	B01A - Antithrombotic agents	B01AA - Vitamin k antagonists	B01AA03	Warfarin	54678486
B - Blood and blood forming organs	B01 - Antithrombotic agents	B01A - Antithrombotic agents	B01AA - Vitamin k antagonists	B01AA04	Phenprocoumon	54680692
B - Blood and blood forming organs	B01 - Antithrombotic agents	B01A - Antithrombotic agents	B01AA - Vitamin k antagonists	B01AA07	Acenocoumarol	54676537
B - Blood and blood forming organs	B01 - Antithrombotic agents	B01A - Antithrombotic agents	B01AA - Vitamin k antagonists	B01AA08	Ethyl biscoumacetate	54685524
B - Blood and blood forming organs	B01 - Antithrombotic agents	B01A - Antithrombotic agents	B01AA - Vitamin k antagonists	B01AA09	Clorindione	70846
B - Blood and blood forming organs	B01 - Antithrombotic agents	B01A - Antithrombotic agents	B01AA - Vitamin k antagonists	B01AA10	Diphenadione	6719
B - Blood and blood forming organs	B01 - Antithrombotic agents	B01A - Antithrombotic agents	B01AA - Vitamin k antagonists	B01AA11	Tioclomarol	54708299
B - Blood and blood forming organs	B01 - Antithrombotic agents	B01A - Antithrombotic agents	B01AA - Vitamin k antagonists	B01AA12	Fluindione	68942
B - Blood and blood forming organs	B01 - Antithrombotic agents	B01A - Antithrombotic agents	B01AB - Heparin group	B01AB01	Heparin	-1
B - Blood and blood forming organs	B01 - Antithrombotic agents	B01A - Antithrombotic agents	B01AB - Heparin group	B01AB02	Antithrombin III	-1
B - Blood and blood forming organs	B01 - Antithrombotic agents	B01A - Antithrombotic agents	B01AB - Heparin group	B01AB04	Dalteparin	772
B - Blood and blood forming organs	B01 - Antithrombotic agents	B01A - Antithrombotic agents	B01AB - Heparin group	B01AB05	Enoxaparin	772
B - Blood and blood forming organs	B01 - Antithrombotic agents	B01A - Antithrombotic agents	B01AB - Heparin group	B01AB06	Nadroparin	772
B - Blood and blood forming organs	B01 - Antithrombotic agents	B01A - Antithrombotic agents	B01AB - Heparin group	B01AB07	Parnaparin	772
B - Blood and blood forming organs	B01 - Antithrombotic agents	B01A - Antithrombotic agents	B01AB - Heparin group	B01AB08	Reviparin	772
B - Blood and blood forming organs	B01 - Antithrombotic agents	B01A - Antithrombotic agents	B01AB - Heparin group	B01AB09	Danaparoid	-1
B - Blood and blood forming organs	B01 - Antithrombotic agents	B01A - Antithrombotic agents	B01AB - Heparin group	B01AB10	Tinzaparin	772
B - Blood and blood forming organs	B01 - Antithrombotic agents	B01A - Antithrombotic agents	B01AB - Heparin group	B01AB11	Sulodexide	-1
B - Blood and blood forming organs	B01 - Antithrombotic agents	B01A - Antithrombotic agents	B01AB - Heparin group	B01AB12	Bemiparin	772
B - Blood and blood forming organs	B01 - Antithrombotic agents	B01A - Antithrombotic agents	B01AB - Heparin group	B01AB51	Heparin, combinations	-1
B - Blood and blood forming organs	B01 - Antithrombotic agents	B01A - Antithrombotic agents	B01AC - Platelet aggregation inhibitors excl. heparin	B01AC01	Ditazole	29088
B - Blood and blood forming organs	B01 - Antithrombotic agents	B01A - Antithrombotic agents	B01AC - Platelet aggregation inhibitors excl. heparin	B01AC02	Cloricromen	68876
B - Blood and blood forming organs	B01 - Antithrombotic agents	B01A - Antithrombotic agents	B01AC - Platelet aggregation inhibitors excl. heparin	B01AC03	Picotamide	4814
B - Blood and blood forming organs	B01 - Antithrombotic agents	B01A - Antithrombotic agents	B01AC - Platelet aggregation inhibitors excl. heparin	B01AC04	Clopidogrel	60606
B - Blood and blood forming organs	B01 - Antithrombotic agents	B01A - Antithrombotic agents	B01AC - Platelet aggregation inhibitors excl. heparin	B01AC05	Ticlopidine	5472
B - Blood and blood forming organs	B01 - Antithrombotic agents	B01A - Antithrombotic agents	B01AC - Platelet aggregation inhibitors excl. heparin	B01AC06	Acetylsalicylic acid	2244
B - Blood and blood forming organs	B01 - Antithrombotic agents	B01A - Antithrombotic agents	B01AC - Platelet aggregation inhibitors excl. heparin	B01AC07	Dipyridamole	3108
B - Blood and blood forming organs	B01 - Antithrombotic agents	B01A - Antithrombotic agents	B01AC - Platelet aggregation inhibitors excl. heparin	B01AC08	Carbasalate calcium	21975
B - Blood and blood forming organs	B01 - Antithrombotic agents	B01A - Antithrombotic agents	B01AC - Platelet aggregation inhibitors excl. heparin	B01AC09	Epoprostenol	5282411
B - Blood and blood forming organs	B01 - Antithrombotic agents	B01A - Antithrombotic agents	B01AC - Platelet aggregation inhibitors excl. heparin	B01AC10	Indobufen	107641
B - Blood and blood forming organs	B01 - Antithrombotic agents	B01A - Antithrombotic agents	B01AC - Platelet aggregation inhibitors excl. heparin	B01AC11	Iloprost	5311181
B - Blood and blood forming organs	B01 - Antithrombotic agents	B01A - Antithrombotic agents	B01AC - Platelet aggregation inhibitors excl. heparin	B01AC13	Abciximab	-1
B - Blood and blood forming organs	B01 - Antithrombotic agents	B01A - Antithrombotic agents	B01AC - Platelet aggregation inhibitors excl. heparin	B01AC15	Aloxiprin	71586929
B - Blood and blood forming organs	B01 - Antithrombotic agents	B01A - Antithrombotic agents	B01AC - Platelet aggregation inhibitors excl. heparin	B01AC16	Eptifibatide	448812
B - Blood and blood forming organs	B01 - Antithrombotic agents	B01A - Antithrombotic agents	B01AC - Platelet aggregation inhibitors excl. heparin	B01AC17	Tirofiban	60947
B - Blood and blood forming organs	B01 - Antithrombotic agents	B01A - Antithrombotic agents	B01AC - Platelet aggregation inhibitors excl. heparin	B01AC18	Triflusal	9458
B - Blood and blood forming organs	B01 - Antithrombotic agents	B01A - Antithrombotic agents	B01AC - Platelet aggregation inhibitors excl. heparin	B01AC19	Beraprost	5282428
B - Blood and blood forming organs	B01 - Antithrombotic agents	B01A - Antithrombotic agents	B01AC - Platelet aggregation inhibitors excl. heparin	B01AC21	Treprostinil	6918140
B - Blood and blood forming organs	B01 - Antithrombotic agents	B01A - Antithrombotic agents	B01AC - Platelet aggregation inhibitors excl. heparin	B01AC22	Prasugrel	6918456
B - Blood and blood forming organs	B01 - Antithrombotic agents	B01A - Antithrombotic agents	B01AC - Platelet aggregation inhibitors excl. heparin	B01AC23	Cilostazol	2754
B - Blood and blood forming organs	B01 - Antithrombotic agents	B01A - Antithrombotic agents	B01AC - Platelet aggregation inhibitors excl. heparin	B01AC24	Ticagrelor	9871419
B - Blood and blood forming organs	B01 - Antithrombotic agents	B01A - Antithrombotic agents	B01AC - Platelet aggregation inhibitors excl. heparin	B01AC25	Cangrelor	9854012
B - Blood and blood forming organs	B01 - Antithrombotic agents	B01A - Antithrombotic agents	B01AC - Platelet aggregation inhibitors excl. heparin	B01AC26	Vorapaxar	10077130
B - Blood and blood forming organs	B01 - Antithrombotic agents	B01A - Antithrombotic agents	B01AC - Platelet aggregation inhibitors excl. heparin	B01AC27	Selexipag	9913767
B - Blood and blood forming organs	B01 - Antithrombotic agents	B01A - Antithrombotic agents	B01AC - Platelet aggregation inhibitors excl. heparin	B01AC28	Limaprost	6438378
B - Blood and blood forming organs	B01 - Antithrombotic agents	B01A - Antithrombotic agents	B01AC - Platelet aggregation inhibitors excl. heparin	B01AC30	Combinations	-1
B - Blood and blood forming organs	B01 - Antithrombotic agents	B01A - Antithrombotic agents	B01AC - Platelet aggregation inhibitors excl. heparin	B01AC56	Acetylsalicylic acid, combinations with proton pump inhibitors	-1
B - Blood and blood forming organs	B01 - Antithrombotic agents	B01A - Antithrombotic agents	B01AD - Enzymes	B01AD01	Streptokinase	-1
B - Blood and blood forming organs	B01 - Antithrombotic agents	B01A - Antithrombotic agents	B01AD - Enzymes	B01AD02	Alteplase	-1
B - Blood and blood forming organs	B01 - Antithrombotic agents	B01A - Antithrombotic agents	B01AD - Enzymes	B01AD03	Anistreplase	-1
B - Blood and blood forming organs	B01 - Antithrombotic agents	B01A - Antithrombotic agents	B01AD - Enzymes	B01AD04	Urokinase	33309
B - Blood and blood forming organs	B01 - Antithrombotic agents	B01A - Antithrombotic agents	B01AD - Enzymes	B01AD05	Fibrinolysin	-1
B - Blood and blood forming organs	B01 - Antithrombotic agents	B01A - Antithrombotic agents	B01AD - Enzymes	B01AD06	Brinase	-1
B - Blood and blood forming organs	B01 - Antithrombotic agents	B01A - Antithrombotic agents	B01AD - Enzymes	B01AD07	Reteplase	-1
B - Blood and blood forming organs	B01 - Antithrombotic agents	B01A - Antithrombotic agents	B01AD - Enzymes	B01AD08	Saruplase	-1
B - Blood and blood forming organs	B01 - Antithrombotic agents	B01A - Antithrombotic agents	B01AD - Enzymes	B01AD09	Ancrod	-1
B - Blood and blood forming organs	B01 - Antithrombotic agents	B01A - Antithrombotic agents	B01AD - Enzymes	B01AD10	Drotrecogin alfa (activated)	-1
B - Blood and blood forming organs	B01 - Antithrombotic agents	B01A - Antithrombotic agents	B01AD - Enzymes	B01AD11	Tenecteplase	-1
B - Blood and blood forming organs	B01 - Antithrombotic agents	B01A - Antithrombotic agents	B01AD - Enzymes	B01AD12	Protein C	-1
B - Blood and blood forming organs	B01 - Antithrombotic agents	B01A - Antithrombotic agents	B01AD - Enzymes	B01AD13	Apadamtase alfa and cinaxadamtase alfa	-1
B - Blood and blood forming organs	B01 - Antithrombotic agents	B01A - Antithrombotic agents	B01AE - Direct thrombin inhibitors	B01AE01	Desirudin	16129703
B - Blood and blood forming organs	B01 - Antithrombotic agents	B01A - Antithrombotic agents	B01AE - Direct thrombin inhibitors	B01AE02	Lepirudin	118856773
B - Blood and blood forming organs	B01 - Antithrombotic agents	B01A - Antithrombotic agents	B01AE - Direct thrombin inhibitors	B01AE03	Argatroban	92722
B - Blood and blood forming organs	B01 - Antithrombotic agents	B01A - Antithrombotic agents	B01AE - Direct thrombin inhibitors	B01AE04	Melagatran	183797
B - Blood and blood forming organs	B01 - Antithrombotic agents	B01A - Antithrombotic agents	B01AE - Direct thrombin inhibitors	B01AE05	Ximelagatran	9574101
B - Blood and blood forming organs	B01 - Antithrombotic agents	B01A - Antithrombotic agents	B01AE - Direct thrombin inhibitors	B01AE06	Bivalirudin	16129704
B - Blood and blood forming organs	B01 - Antithrombotic agents	B01A - Antithrombotic agents	B01AE - Direct thrombin inhibitors	B01AE07	Dabigatran etexilate	135565674
B - Blood and blood forming organs	B01 - Antithrombotic agents	B01A - Antithrombotic agents	B01AF - Direct factor xa inhibitors	B01AF01	Rivaroxaban	9875401
B - Blood and blood forming organs	B01 - Antithrombotic agents	B01A - Antithrombotic agents	B01AF - Direct factor xa inhibitors	B01AF02	Apixaban	10182969
B - Blood and blood forming organs	B01 - Antithrombotic agents	B01A - Antithrombotic agents	B01AF - Direct factor xa inhibitors	B01AF03	Edoxaban	10280735
B - Blood and blood forming organs	B01 - Antithrombotic agents	B01A - Antithrombotic agents	B01AF - Direct factor xa inhibitors	B01AF04	Betrixaban	10275777
B - Blood and blood forming organs	B01 - Antithrombotic agents	B01A - Antithrombotic agents	B01AF - Direct factor xa inhibitors	B01AF51	Rivaroxaban and acetylsalicylic acid	-1
B - Blood and blood forming organs	B01 - Antithrombotic agents	B01A - Antithrombotic agents	B01AX - Other antithrombotic agents	B01AX01	Defibrotide	135565962
B - Blood and blood forming organs	B01 - Antithrombotic agents	B01A - Antithrombotic agents	B01AX - Other antithrombotic agents	B01AX04	Dermatan sulfate	32756
B - Blood and blood forming organs	B01 - Antithrombotic agents	B01A - Antithrombotic agents	B01AX - Other antithrombotic agents	B01AX05	Fondaparinux	5282448
B - Blood and blood forming organs	B01 - Antithrombotic agents	B01A - Antithrombotic agents	B01AX - Other antithrombotic agents	B01AX07	Caplacizumab	-1
B - Blood and blood forming organs	B02 - Antihemorrhagics	B02A - Antifibrinolytics	B02AA - Amino acids	B02AA01	Aminocaproic acid	564
B - Blood and blood forming organs	B02 - Antihemorrhagics	B02A - Antifibrinolytics	B02AA - Amino acids	B02AA02	Tranexamic acid	5526
B - Blood and blood forming organs	B02 - Antihemorrhagics	B02A - Antifibrinolytics	B02AA - Amino acids	B02AA03	Aminomethylbenzoic acid	65526
B - Blood and blood forming organs	B02 - Antihemorrhagics	B02A - Antifibrinolytics	B02AB - Proteinase inhibitors	B02AB01	Aprotinin	22833874
B - Blood and blood forming organs	B02 - Antihemorrhagics	B02A - Antifibrinolytics	B02AB - Proteinase inhibitors	B02AB02	Alfa1 antitrypsin	-1
B - Blood and blood forming organs	B02 - Antihemorrhagics	B02A - Antifibrinolytics	B02AB - Proteinase inhibitors	B02AB04	Camostat	2536
B - Blood and blood forming organs	B02 - Antihemorrhagics	B02A - Antifibrinolytics	B02AB - Proteinase inhibitors	B02AB05	Ulinastatin	-1
B - Blood and blood forming organs	B02 - Antihemorrhagics	B02B - Vitamin k and other hemostatics	B02BA - Vitamin k	B02BA01	Phytomenadione	5284607
B - Blood and blood forming organs	B02 - Antihemorrhagics	B02B - Vitamin k and other hemostatics	B02BA - Vitamin k	B02BA02	Menadione	4055
B - Blood and blood forming organs	B02 - Antihemorrhagics	B02B - Vitamin k and other hemostatics	B02BB - Fibrinogen	B02BB01	Fibrinogen, human	-1
B - Blood and blood forming organs	B02 - Antihemorrhagics	B02B - Vitamin k and other hemostatics	B02BC - Local hemostatics	B02BC01	Absorbable gelatin sponge	-1
B - Blood and blood forming organs	B02 - Antihemorrhagics	B02B - Vitamin k and other hemostatics	B02BC - Local hemostatics	B02BC02	Oxidized cellulose	-1
B - Blood and blood forming organs	B02 - Antihemorrhagics	B02B - Vitamin k and other hemostatics	B02BC - Local hemostatics	B02BC03	Tetragalacturonic acid hydroxymethylester	72941563
B - Blood and blood forming organs	B02 - Antihemorrhagics	B02B - Vitamin k and other hemostatics	B02BC - Local hemostatics	B02BC05	Adrenalone	7436
B - Blood and blood forming organs	B02 - Antihemorrhagics	B02B - Vitamin k and other hemostatics	B02BC - Local hemostatics	B02BC06	Thrombin	-1
B - Blood and blood forming organs	B02 - Antihemorrhagics	B02B - Vitamin k and other hemostatics	B02BC - Local hemostatics	B02BC07	Collagen	-1
B - Blood and blood forming organs	B02 - Antihemorrhagics	B02B - Vitamin k and other hemostatics	B02BC - Local hemostatics	B02BC08	Calcium alginate	44630049
B - Blood and blood forming organs	B02 - Antihemorrhagics	B02B - Vitamin k and other hemostatics	B02BC - Local hemostatics	B02BC09	Epinephrine	5816
B - Blood and blood forming organs	B02 - Antihemorrhagics	B02B - Vitamin k and other hemostatics	B02BC - Local hemostatics	B02BC30	Combinations	-1
B - Blood and blood forming organs	B02 - Antihemorrhagics	B02B - Vitamin k and other hemostatics	B02BD - Blood coagulation factors	B02BD01	Coagulation factor IX, II, VII and X in combination	-1
B - Blood and blood forming organs	B02 - Antihemorrhagics	B02B - Vitamin k and other hemostatics	B02BD - Blood coagulation factors	B02BD02	Coagulation factor VIII	-1
B - Blood and blood forming organs	B02 - Antihemorrhagics	B02B - Vitamin k and other hemostatics	B02BD - Blood coagulation factors	B02BD03	Factor VIII inhibitor bypassing activity	-1
B - Blood and blood forming organs	B02 - Antihemorrhagics	B02B - Vitamin k and other hemostatics	B02BD - Blood coagulation factors	B02BD04	Coagulation factor IX	-1
B - Blood and blood forming organs	B02 - Antihemorrhagics	B02B - Vitamin k and other hemostatics	B02BD - Blood coagulation factors	B02BD05	Coagulation factor VII	-1
B - Blood and blood forming organs	B02 - Antihemorrhagics	B02B - Vitamin k and other hemostatics	B02BD - Blood coagulation factors	B02BD06	Von Willebrand factor and coagulation factor VIII in combination	-1
B - Blood and blood forming organs	B02 - Antihemorrhagics	B02B - Vitamin k and other hemostatics	B02BD - Blood coagulation factors	B02BD07	Coagulation factor XIII	-1
B - Blood and blood forming organs	B02 - Antihemorrhagics	B02B - Vitamin k and other hemostatics	B02BD - Blood coagulation factors	B02BD08	Coagulation factor VIIa	-1
B - Blood and blood forming organs	B02 - Antihemorrhagics	B02B - Vitamin k and other hemostatics	B02BD - Blood coagulation factors	B02BD10	Von Willebrand factor	-1
B - Blood and blood forming organs	B02 - Antihemorrhagics	B02B - Vitamin k and other hemostatics	B02BD - Blood coagulation factors	B02BD11	Catridecacog	-1
B - Blood and blood forming organs	B02 - Antihemorrhagics	B02B - Vitamin k and other hemostatics	B02BD - Blood coagulation factors	B02BD13	Coagulation factor X	-1
B - Blood and blood forming organs	B02 - Antihemorrhagics	B02B - Vitamin k and other hemostatics	B02BD - Blood coagulation factors	B02BD14	Susoctocog alfa	-1
B - Blood and blood forming organs	B02 - Antihemorrhagics	B02B - Vitamin k and other hemostatics	B02BD - Blood coagulation factors	B02BD15	Valoctocogene roxaparvovec	-1
B - Blood and blood forming organs	B02 - Antihemorrhagics	B02B - Vitamin k and other hemostatics	B02BD - Blood coagulation factors	B02BD16	Etranacogene dezaparvovec	-1
B - Blood and blood forming organs	B02 - Antihemorrhagics	B02B - Vitamin k and other hemostatics	B02BD - Blood coagulation factors	B02BD30	Thrombin	-1
B - Blood and blood forming organs	B02 - Antihemorrhagics	B02B - Vitamin k and other hemostatics	B02BX - Other systemic hemostatics	B02BX01	Etamsylate	17506
B - Blood and blood forming organs	B02 - Antihemorrhagics	B02B - Vitamin k and other hemostatics	B02BX - Other systemic hemostatics	B02BX02	Carbazochrome	2557
B - Blood and blood forming organs	B02 - Antihemorrhagics	B02B - Vitamin k and other hemostatics	B02BX - Other systemic hemostatics	B02BX03	Batroxobin	-1
B - Blood and blood forming organs	B02 - Antihemorrhagics	B02B - Vitamin k and other hemostatics	B02BX - Other systemic hemostatics	B02BX04	Romiplostim	-1
B - Blood and blood forming organs	B02 - Antihemorrhagics	B02B - Vitamin k and other hemostatics	B02BX - Other systemic hemostatics	B02BX05	Eltrombopag	135449332
B - Blood and blood forming organs	B02 - Antihemorrhagics	B02B - Vitamin k and other hemostatics	B02BX - Other systemic hemostatics	B02BX06	Emicizumab	-1
B - Blood and blood forming organs	B02 - Antihemorrhagics	B02B - Vitamin k and other hemostatics	B02BX - Other systemic hemostatics	B02BX07	Lusutrombopag	49843517
B - Blood and blood forming organs	B02 - Antihemorrhagics	B02B - Vitamin k and other hemostatics	B02BX - Other systemic hemostatics	B02BX08	Avatrombopag	9852519
B - Blood and blood forming organs	B02 - Antihemorrhagics	B02B - Vitamin k and other hemostatics	B02BX - Other systemic hemostatics	B02BX09	Fostamatinib	11671467
B - Blood and blood forming organs	B02 - Antihemorrhagics	B02B - Vitamin k and other hemostatics	B02BX - Other systemic hemostatics	B02BX10	Concizumab	-1
B - Blood and blood forming organs	B03 - Antianemic preparations	B03A - Iron preparations	B03AA - Iron bivalent, oral preparations	B03AA01	Ferrous glycine sulfate	-1
B - Blood and blood forming organs	B03 - Antianemic preparations	B03A - Iron preparations	B03AA - Iron bivalent, oral preparations	B03AA02	Ferrous fumarate	6433164
B - Blood and blood forming organs	B03 - Antianemic preparations	B03A - Iron preparations	B03AA - Iron bivalent, oral preparations	B03AA03	Ferrous gluconate	23616740
B - Blood and blood forming organs	B03 - Antianemic preparations	B03A - Iron preparations	B03AA - Iron bivalent, oral preparations	B03AA04	Ferrous carbonate	11248
B - Blood and blood forming organs	B03 - Antianemic preparations	B03A - Iron preparations	B03AA - Iron bivalent, oral preparations	B03AA05	Ferrous chloride	24458
B - Blood and blood forming organs	B03 - Antianemic preparations	B03A - Iron preparations	B03AA - Iron bivalent, oral preparations	B03AA06	Ferrous succinate	10464762
B - Blood and blood forming organs	B03 - Antianemic preparations	B03A - Iron preparations	B03AA - Iron bivalent, oral preparations	B03AA07	Ferrous sulfate	24393
B - Blood and blood forming organs	B03 - Antianemic preparations	B03A - Iron preparations	B03AA - Iron bivalent, oral preparations	B03AA08	Ferrous tartrate	6451676
B - Blood and blood forming organs	B03 - Antianemic preparations	B03A - Iron preparations	B03AA - Iron bivalent, oral preparations	B03AA09	Ferrous aspartate	13270162
B - Blood and blood forming organs	B03 - Antianemic preparations	B03A - Iron preparations	B03AA - Iron bivalent, oral preparations	B03AA10	Ferrous ascorbate	86763295
B - Blood and blood forming organs	B03 - Antianemic preparations	B03A - Iron preparations	B03AA - Iron bivalent, oral preparations	B03AA11	Ferrous iodine	-1
B - Blood and blood forming organs	B03 - Antianemic preparations	B03A - Iron preparations	B03AA - Iron bivalent, oral preparations	B03AA12	Ferrous sodium citrate	71587155
B - Blood and blood forming organs	B03 - Antianemic preparations	B03A - Iron preparations	B03AB - Iron trivalent, oral preparations	B03AB01	Ferric sodium citrate	76957760
B - Blood and blood forming organs	B03 - Antianemic preparations	B03A - Iron preparations	B03AB - Iron trivalent, oral preparations	B03AB02	Saccharated iron oxide	91663255
B - Blood and blood forming organs	B03 - Antianemic preparations	B03A - Iron preparations	B03AB - Iron trivalent, oral preparations	B03AB03	Sodium feredetate	27461
B - Blood and blood forming organs	B03 - Antianemic preparations	B03A - Iron preparations	B03AB - Iron trivalent, oral preparations	B03AB04	Ferric hydroxide	445709
B - Blood and blood forming organs	B03 - Antianemic preparations	B03A - Iron preparations	B03AB - Iron trivalent, oral preparations	B03AB05	Ferric oxide polymaltose complexes	-1
B - Blood and blood forming organs	B03 - Antianemic preparations	B03A - Iron preparations	B03AB - Iron trivalent, oral preparations	B03AB07	Chondroitin sulfate-iron complex	-1
B - Blood and blood forming organs	B03 - Antianemic preparations	B03A - Iron preparations	B03AB - Iron trivalent, oral preparations	B03AB08	Ferric acetyl transferrin	-1
B - Blood and blood forming organs	B03 - Antianemic preparations	B03A - Iron preparations	B03AB - Iron trivalent, oral preparations	B03AB09	Ferric proteinsuccinylate	-1
B - Blood and blood forming organs	B03 - Antianemic preparations	B03A - Iron preparations	B03AB - Iron trivalent, oral preparations	B03AB10	Ferric maltol	169535
B - Blood and blood forming organs	B03 - Antianemic preparations	B03A - Iron preparations	B03AD - Iron in combination with folic acid	B03AD01	Ferrous amino acid complex and folic acid	-1
B - Blood and blood forming organs	B03 - Antianemic preparations	B03A - Iron preparations	B03AD - Iron in combination with folic acid	B03AD02	Ferrous fumarate and folic acid	-1
B - Blood and blood forming organs	B03 - Antianemic preparations	B03A - Iron preparations	B03AD - Iron in combination with folic acid	B03AD03	Ferrous sulfate and folic acid	-1
B - Blood and blood forming organs	B03 - Antianemic preparations	B03A - Iron preparations	B03AD - Iron in combination with folic acid	B03AD04	Ferric oxide polymaltose complexes and folic acid	-1
B - Blood and blood forming organs	B03 - Antianemic preparations	B03A - Iron preparations	B03AD - Iron in combination with folic acid	B03AD05	Ferrous gluconate and folic acid	-1
B - Blood and blood forming organs	B03 - Antianemic preparations	B03A - Iron preparations	B03AE - Iron in other combinations	B03AE01	Iron, vitamin B12 and folic acid	-1
B - Blood and blood forming organs	B03 - Antianemic preparations	B03A - Iron preparations	B03AE - Iron in other combinations	B03AE02	Iron, multivitamins and folic acid	-1
B - Blood and blood forming organs	B03 - Antianemic preparations	B03A - Iron preparations	B03AE - Iron in other combinations	B03AE03	Iron and multivitamins	-1
B - Blood and blood forming organs	B03 - Antianemic preparations	B03A - Iron preparations	B03AE - Iron in other combinations	B03AE04	Iron, multivitamins and minerals	-1
B - Blood and blood forming organs	B03 - Antianemic preparations	B03A - Iron preparations	B03AE - Iron in other combinations	B03AE10	Various combinations	-1
B - Blood and blood forming organs	B03 - Antianemic preparations	B03B - Vitamin b12 and folic acid	B03BA - Vitamin b12 (cyanocobalamin and analogues)	B03BA01	Cyanocobalamin	5311498
B - Blood and blood forming organs	B03 - Antianemic preparations	B03B - Vitamin b12 and folic acid	B03BA - Vitamin b12 (cyanocobalamin and analogues)	B03BA02	Cyanocobalamin tannin complex	-1
B - Blood and blood forming organs	B03 - Antianemic preparations	B03B - Vitamin b12 and folic acid	B03BA - Vitamin b12 (cyanocobalamin and analogues)	B03BA03	Hydroxocobalamin	44475014
B - Blood and blood forming organs	B03 - Antianemic preparations	B03B - Vitamin b12 and folic acid	B03BA - Vitamin b12 (cyanocobalamin and analogues)	B03BA04	Cobamamide	6474320
B - Blood and blood forming organs	B03 - Antianemic preparations	B03B - Vitamin b12 and folic acid	B03BA - Vitamin b12 (cyanocobalamin and analogues)	B03BA05	Mecobalamin	10898559
B - Blood and blood forming organs	B03 - Antianemic preparations	B03B - Vitamin b12 and folic acid	B03BA - Vitamin b12 (cyanocobalamin and analogues)	B03BA51	Cyanocobalamin, combinations	-1
B - Blood and blood forming organs	B03 - Antianemic preparations	B03B - Vitamin b12 and folic acid	B03BA - Vitamin b12 (cyanocobalamin and analogues)	B03BA53	Hydroxocobalamin, combinations	-1
B - Blood and blood forming organs	B03 - Antianemic preparations	B03B - Vitamin b12 and folic acid	B03BB - Folic acid and derivatives	B03BB01	Folic acid	135398658
B - Blood and blood forming organs	B03 - Antianemic preparations	B03B - Vitamin b12 and folic acid	B03BB - Folic acid and derivatives	B03BB51	Folic acid, combinations	-1
B - Blood and blood forming organs	B03 - Antianemic preparations	B03X - Other antianemic preparations	B03XA - Other antianemic preparations	B03XA01	Erythropoietin	11751549
B - Blood and blood forming organs	B03 - Antianemic preparations	B03X - Other antianemic preparations	B03XA - Other antianemic preparations	B03XA02	Darbepoetin alfa	-1
B - Blood and blood forming organs	B03 - Antianemic preparations	B03X - Other antianemic preparations	B03XA - Other antianemic preparations	B03XA03	Methoxy polyethylene glycol-epoetin beta	-1
B - Blood and blood forming organs	B03 - Antianemic preparations	B03X - Other antianemic preparations	B03XA - Other antianemic preparations	B03XA04	Peginesatide	-1
B - Blood and blood forming organs	B03 - Antianemic preparations	B03X - Other antianemic preparations	B03XA - Other antianemic preparations	B03XA05	Roxadustat	11256664
B - Blood and blood forming organs	B03 - Antianemic preparations	B03X - Other antianemic preparations	B03XA - Other antianemic preparations	B03XA06	Luspatercept	-1
B - Blood and blood forming organs	B03 - Antianemic preparations	B03X - Other antianemic preparations	B03XA - Other antianemic preparations	B03XA07	Daprodustat	91617630
B - Blood and blood forming organs	B03 - Antianemic preparations	B03X - Other antianemic preparations	B03XA - Other antianemic preparations	B03XA08	Vadadustat	23634441
B - Blood and blood forming organs	B05 - Blood substitutes and perfusion solutions	B05A - Blood and related products	B05AA - Blood substitutes and plasma protein fractions	B05AA01	Albumin	-1
B - Blood and blood forming organs	B05 - Blood substitutes and perfusion solutions	B05A - Blood and related products	B05AA - Blood substitutes and plasma protein fractions	B05AA02	Other plasma protein fractions	-1
B - Blood and blood forming organs	B05 - Blood substitutes and perfusion solutions	B05A - Blood and related products	B05AA - Blood substitutes and plasma protein fractions	B05AA03	Fluorocarbon blood substitutes	-1
B - Blood and blood forming organs	B05 - Blood substitutes and perfusion solutions	B05A - Blood and related products	B05AA - Blood substitutes and plasma protein fractions	B05AA05	Dextran	4125253
B - Blood and blood forming organs	B05 - Blood substitutes and perfusion solutions	B05A - Blood and related products	B05AA - Blood substitutes and plasma protein fractions	B05AA06	Gelatin agents	-1
B - Blood and blood forming organs	B05 - Blood substitutes and perfusion solutions	B05A - Blood and related products	B05AA - Blood substitutes and plasma protein fractions	B05AA07	Hydroxyethylstarch	-1
B - Blood and blood forming organs	B05 - Blood substitutes and perfusion solutions	B05A - Blood and related products	B05AA - Blood substitutes and plasma protein fractions	B05AA08	Hemoglobin crosfumaril	-1
B - Blood and blood forming organs	B05 - Blood substitutes and perfusion solutions	B05A - Blood and related products	B05AA - Blood substitutes and plasma protein fractions	B05AA09	Hemoglobin raffimer	-1
B - Blood and blood forming organs	B05 - Blood substitutes and perfusion solutions	B05A - Blood and related products	B05AA - Blood substitutes and plasma protein fractions	B05AA10	Hemoglobin glutamer (bovine)	-1
B - Blood and blood forming organs	B05 - Blood substitutes and perfusion solutions	B05A - Blood and related products	B05AX - Other blood products	B05AX01	Erythrocytes	-1
B - Blood and blood forming organs	B05 - Blood substitutes and perfusion solutions	B05A - Blood and related products	B05AX - Other blood products	B05AX02	Thrombocytes	-1
B - Blood and blood forming organs	B05 - Blood substitutes and perfusion solutions	B05A - Blood and related products	B05AX - Other blood products	B05AX03	Blood plasma	-1
B - Blood and blood forming organs	B05 - Blood substitutes and perfusion solutions	B05A - Blood and related products	B05AX - Other blood products	B05AX04	Stem cells from umbilical cord blood	-1
B - Blood and blood forming organs	B05 - Blood substitutes and perfusion solutions	B05B - I.v. solutions	B05BA - Solutions for parenteral nutrition	B05BA01	Amino acids	-1
B - Blood and blood forming organs	B05 - Blood substitutes and perfusion solutions	B05B - I.v. solutions	B05BA - Solutions for parenteral nutrition	B05BA02	Fat emulsions	-1
B - Blood and blood forming organs	B05 - Blood substitutes and perfusion solutions	B05B - I.v. solutions	B05BA - Solutions for parenteral nutrition	B05BA03	Carbohydrates	-1
B - Blood and blood forming organs	B05 - Blood substitutes and perfusion solutions	B05B - I.v. solutions	B05BA - Solutions for parenteral nutrition	B05BA04	Protein hydrolysates	-1
B - Blood and blood forming organs	B05 - Blood substitutes and perfusion solutions	B05B - I.v. solutions	B05BA - Solutions for parenteral nutrition	B05BA10	Combinations	-1
B - Blood and blood forming organs	B05 - Blood substitutes and perfusion solutions	B05B - I.v. solutions	B05BB - Solutions affecting the electrolyte balance	B05BB01	Electrolytes	-1
B - Blood and blood forming organs	B05 - Blood substitutes and perfusion solutions	B05B - I.v. solutions	B05BB - Solutions affecting the electrolyte balance	B05BB02	Electrolytes with carbohydrates	-1
B - Blood and blood forming organs	B05 - Blood substitutes and perfusion solutions	B05B - I.v. solutions	B05BB - Solutions affecting the electrolyte balance	B05BB03	Trometamol	6503
B - Blood and blood forming organs	B05 - Blood substitutes and perfusion solutions	B05B - I.v. solutions	B05BB - Solutions affecting the electrolyte balance	B05BB04	Electrolytes in combination with other drugs	-1
B - Blood and blood forming organs	B05 - Blood substitutes and perfusion solutions	B05B - I.v. solutions	B05BC - Solutions producing osmotic diuresis	B05BC01	Mannitol	6251
B - Blood and blood forming organs	B05 - Blood substitutes and perfusion solutions	B05B - I.v. solutions	B05BC - Solutions producing osmotic diuresis	B05BC02	Carbamide	1176
B - Blood and blood forming organs	B05 - Blood substitutes and perfusion solutions	B05C - Irrigating solutions	B05CA - Antiinfectives	B05CA01	Cetylpyridinium	2683
B - Blood and blood forming organs	B05 - Blood substitutes and perfusion solutions	B05C - Irrigating solutions	B05CA - Antiinfectives	B05CA02	Chlorhexidine	9552079
B - Blood and blood forming organs	B05 - Blood substitutes and perfusion solutions	B05C - Irrigating solutions	B05CA - Antiinfectives	B05CA03	Nitrofural	5447130
B - Blood and blood forming organs	B05 - Blood substitutes and perfusion solutions	B05C - Irrigating solutions	B05CA - Antiinfectives	B05CA04	Sulfamethizole	5328
B - Blood and blood forming organs	B05 - Blood substitutes and perfusion solutions	B05C - Irrigating solutions	B05CA - Antiinfectives	B05CA05	Taurolidine	29566
B - Blood and blood forming organs	B05 - Blood substitutes and perfusion solutions	B05C - Irrigating solutions	B05CA - Antiinfectives	B05CA06	Mandelic acid	1292
B - Blood and blood forming organs	B05 - Blood substitutes and perfusion solutions	B05C - Irrigating solutions	B05CA - Antiinfectives	B05CA07	Noxytiolin	5251503
B - Blood and blood forming organs	B05 - Blood substitutes and perfusion solutions	B05C - Irrigating solutions	B05CA - Antiinfectives	B05CA08	Ethacridine lactate	15789
B - Blood and blood forming organs	B05 - Blood substitutes and perfusion solutions	B05C - Irrigating solutions	B05CA - Antiinfectives	B05CA09	Neomycin	8378
B - Blood and blood forming organs	B05 - Blood substitutes and perfusion solutions	B05C - Irrigating solutions	B05CA - Antiinfectives	B05CA10	Combinations	-1
B - Blood and blood forming organs	B05 - Blood substitutes and perfusion solutions	B05C - Irrigating solutions	B05CB - Salt solutions	B05CB01	Sodium chloride	5234
B - Blood and blood forming organs	B05 - Blood substitutes and perfusion solutions	B05C - Irrigating solutions	B05CB - Salt solutions	B05CB02	Sodium citrate	6224
B - Blood and blood forming organs	B05 - Blood substitutes and perfusion solutions	B05C - Irrigating solutions	B05CB - Salt solutions	B05CB03	Magnesium citrate	6099959
B - Blood and blood forming organs	B05 - Blood substitutes and perfusion solutions	B05C - Irrigating solutions	B05CB - Salt solutions	B05CB04	Sodium bicarbonate	516892
B - Blood and blood forming organs	B05 - Blood substitutes and perfusion solutions	B05C - Irrigating solutions	B05CB - Salt solutions	B05CB10	Combinations	-1
B - Blood and blood forming organs	B05 - Blood substitutes and perfusion solutions	B05C - Irrigating solutions	B05CX - Other irrigating solutions	B05CX01	Glucose	5793
B - Blood and blood forming organs	B05 - Blood substitutes and perfusion solutions	B05C - Irrigating solutions	B05CX - Other irrigating solutions	B05CX02	Sorbitol	5780
B - Blood and blood forming organs	B05 - Blood substitutes and perfusion solutions	B05C - Irrigating solutions	B05CX - Other irrigating solutions	B05CX03	Glycine	750
B - Blood and blood forming organs	B05 - Blood substitutes and perfusion solutions	B05C - Irrigating solutions	B05CX - Other irrigating solutions	B05CX04	Mannitol	6251
B - Blood and blood forming organs	B05 - Blood substitutes and perfusion solutions	B05C - Irrigating solutions	B05CX - Other irrigating solutions	B05CX10	Combinations	-1
B - Blood and blood forming organs	B05 - Blood substitutes and perfusion solutions	B05X - I.v. solution additives	B05XA - Electrolyte solutions	B05XA01	Potassium chloride	4873
B - Blood and blood forming organs	B05 - Blood substitutes and perfusion solutions	B05X - I.v. solution additives	B05XA - Electrolyte solutions	B05XA02	Sodium bicarbonate	516892
B - Blood and blood forming organs	B05 - Blood substitutes and perfusion solutions	B05X - I.v. solution additives	B05XA - Electrolyte solutions	B05XA03	Sodium chloride	5234
B - Blood and blood forming organs	B05 - Blood substitutes and perfusion solutions	B05X - I.v. solution additives	B05XA - Electrolyte solutions	B05XA04	Ammonium chloride	25517
B - Blood and blood forming organs	B05 - Blood substitutes and perfusion solutions	B05X - I.v. solution additives	B05XA - Electrolyte solutions	B05XA05	Magnesium sulfate	24083
B - Blood and blood forming organs	B05 - Blood substitutes and perfusion solutions	B05X - I.v. solution additives	B05XA - Electrolyte solutions	B05XA06	Potassium phosphate, incl. combinations with other potassium salts	-1
B - Blood and blood forming organs	B05 - Blood substitutes and perfusion solutions	B05X - I.v. solution additives	B05XA - Electrolyte solutions	B05XA07	Calcium chloride	5284359
B - Blood and blood forming organs	B05 - Blood substitutes and perfusion solutions	B05X - I.v. solution additives	B05XA - Electrolyte solutions	B05XA08	Sodium acetate	517045
B - Blood and blood forming organs	B05 - Blood substitutes and perfusion solutions	B05X - I.v. solution additives	B05XA - Electrolyte solutions	B05XA09	Sodium phosphate	24243
B - Blood and blood forming organs	B05 - Blood substitutes and perfusion solutions	B05X - I.v. solution additives	B05XA - Electrolyte solutions	B05XA10	Magnesium phosphate	24439
B - Blood and blood forming organs	B05 - Blood substitutes and perfusion solutions	B05X - I.v. solution additives	B05XA - Electrolyte solutions	B05XA11	Magnesium chloride	5360315
B - Blood and blood forming organs	B05 - Blood substitutes and perfusion solutions	B05X - I.v. solution additives	B05XA - Electrolyte solutions	B05XA12	Zinc chloride	5727
B - Blood and blood forming organs	B05 - Blood substitutes and perfusion solutions	B05X - I.v. solution additives	B05XA - Electrolyte solutions	B05XA13	Hydrochloric acid	313
B - Blood and blood forming organs	B05 - Blood substitutes and perfusion solutions	B05X - I.v. solution additives	B05XA - Electrolyte solutions	B05XA14	Sodium glycerophosphate	14754
B - Blood and blood forming organs	B05 - Blood substitutes and perfusion solutions	B05X - I.v. solution additives	B05XA - Electrolyte solutions	B05XA15	Potassium lactate	23671663
B - Blood and blood forming organs	B05 - Blood substitutes and perfusion solutions	B05X - I.v. solution additives	B05XA - Electrolyte solutions	B05XA16	Cardioplegia solutions	-1
B - Blood and blood forming organs	B05 - Blood substitutes and perfusion solutions	B05X - I.v. solution additives	B05XA - Electrolyte solutions	B05XA17	Potassium acetate	517044
B - Blood and blood forming organs	B05 - Blood substitutes and perfusion solutions	B05X - I.v. solution additives	B05XA - Electrolyte solutions	B05XA18	Zinc sulfate	24424
B - Blood and blood forming organs	B05 - Blood substitutes and perfusion solutions	B05X - I.v. solution additives	B05XA - Electrolyte solutions	B05XA19	Calcium gluconate	9290
B - Blood and blood forming organs	B05 - Blood substitutes and perfusion solutions	B05X - I.v. solution additives	B05XA - Electrolyte solutions	B05XA20	Sodium selenite	24934
B - Blood and blood forming organs	B05 - Blood substitutes and perfusion solutions	B05X - I.v. solution additives	B05XA - Electrolyte solutions	B05XA30	Combinations of electrolytes	-1
B - Blood and blood forming organs	B05 - Blood substitutes and perfusion solutions	B05X - I.v. solution additives	B05XA - Electrolyte solutions	B05XA31	Electrolytes in combination with other drugs	-1
B - Blood and blood forming organs	B05 - Blood substitutes and perfusion solutions	B05X - I.v. solution additives	B05XB - Amino acids	B05XB01	Arginine hydrochloride	66250
B - Blood and blood forming organs	B05 - Blood substitutes and perfusion solutions	B05X - I.v. solution additives	B05XB - Amino acids	B05XB02	Alanyl glutamine	123935
B - Blood and blood forming organs	B05 - Blood substitutes and perfusion solutions	B05X - I.v. solution additives	B05XB - Amino acids	B05XB03	Lysine	5962
B - Blood and blood forming organs	B05 - Blood substitutes and perfusion solutions	B05X - I.v. solution additives	B05XX - Other i.v. solution additives	B05XX02	Trometamol	6503
B - Blood and blood forming organs	B06 - Other hematological agents	B06A - Other hematological agents	B06AA - Enzymes	B06AA02	Fibrinolysin and desoxyribonuclease	-1
B - Blood and blood forming organs	B06 - Other hematological agents	B06A - Other hematological agents	B06AA - Enzymes	B06AA03	Hyaluronidase	91820602
B - Blood and blood forming organs	B06 - Other hematological agents	B06A - Other hematological agents	B06AA - Enzymes	B06AA04	Chymotrypsin	4052643
B - Blood and blood forming organs	B06 - Other hematological agents	B06A - Other hematological agents	B06AA - Enzymes	B06AA07	Trypsin	-1
B - Blood and blood forming organs	B06 - Other hematological agents	B06A - Other hematological agents	B06AA - Enzymes	B06AA10	Desoxyribonuclease	-1
B - Blood and blood forming organs	B06 - Other hematological agents	B06A - Other hematological agents	B06AA - Enzymes	B06AA55	Streptokinase, combinations	-1
B - Blood and blood forming organs	B06 - Other hematological agents	B06A - Other hematological agents	B06AB - Heme products	B06AB01	Hemin	455658
B - Blood and blood forming organs	B06 - Other hematological agents	B06A - Other hematological agents	B06AC - Drugs used in hereditary angioedema	B06AC01	C1-inhibitor, plasma derived	-1
B - Blood and blood forming organs	B06 - Other hematological agents	B06A - Other hematological agents	B06AC - Drugs used in hereditary angioedema	B06AC02	Icatibant	6918173
B - Blood and blood forming organs	B06 - Other hematological agents	B06A - Other hematological agents	B06AC - Drugs used in hereditary angioedema	B06AC03	Ecallantide	44152182
B - Blood and blood forming organs	B06 - Other hematological agents	B06A - Other hematological agents	B06AC - Drugs used in hereditary angioedema	B06AC04	Conestat alfa	-1
B - Blood and blood forming organs	B06 - Other hematological agents	B06A - Other hematological agents	B06AC - Drugs used in hereditary angioedema	B06AC05	Lanadelumab	-1
B - Blood and blood forming organs	B06 - Other hematological agents	B06A - Other hematological agents	B06AC - Drugs used in hereditary angioedema	B06AC06	Berotralstat	137528262
B - Blood and blood forming organs	B06 - Other hematological agents	B06A - Other hematological agents	B06AX - Other hematological agents	B06AX01	Crizanlizumab	-1
B - Blood and blood forming organs	B06 - Other hematological agents	B06A - Other hematological agents	B06AX - Other hematological agents	B06AX02	Betibeglogene autotemcel	-1
B - Blood and blood forming organs	B06 - Other hematological agents	B06A - Other hematological agents	B06AX - Other hematological agents	B06AX03	Voxelotor	71602803
B - Blood and blood forming organs	B06 - Other hematological agents	B06A - Other hematological agents	B06AX - Other hematological agents	B06AX04	Mitapivat	59634741
B - Blood and blood forming organs	B06 - Other hematological agents	B06A - Other hematological agents	B06AX - Other hematological agents	B06AX05	Exagamglogene autotemcel	-1
C - Cardiovascular system	C01 - Cardiac therapy	C01A - Cardiac glycosides	C01AA - Digitalis glycosides	C01AA01	Acetyldigitoxin	5284512
C - Cardiovascular system	C01 - Cardiac therapy	C01A - Cardiac glycosides	C01AA - Digitalis glycosides	C01AA02	Acetyldigoxin	11765960
C - Cardiovascular system	C01 - Cardiac therapy	C01A - Cardiac glycosides	C01AA - Digitalis glycosides	C01AA03	Digitalis leaves	-1
C - Cardiovascular system	C01 - Cardiac therapy	C01A - Cardiac glycosides	C01AA - Digitalis glycosides	C01AA04	Digitoxin	441207
C - Cardiovascular system	C01 - Cardiac therapy	C01A - Cardiac glycosides	C01AA - Digitalis glycosides	C01AA05	Digoxin	2724385
C - Cardiovascular system	C01 - Cardiac therapy	C01A - Cardiac glycosides	C01AA - Digitalis glycosides	C01AA06	Lanatoside C	656630
C - Cardiovascular system	C01 - Cardiac therapy	C01A - Cardiac glycosides	C01AA - Digitalis glycosides	C01AA07	Deslanoside	28620
C - Cardiovascular system	C01 - Cardiac therapy	C01A - Cardiac glycosides	C01AA - Digitalis glycosides	C01AA08	Metildigoxin	443946
C - Cardiovascular system	C01 - Cardiac therapy	C01A - Cardiac glycosides	C01AA - Digitalis glycosides	C01AA09	Gitoformate	20055283
C - Cardiovascular system	C01 - Cardiac therapy	C01A - Cardiac glycosides	C01AA - Digitalis glycosides	C01AA52	Acetyldigoxin, combinations	-1
C - Cardiovascular system	C01 - Cardiac therapy	C01A - Cardiac glycosides	C01AB - Scilla glycosides	C01AB01	Proscillaridin	5284613
C - Cardiovascular system	C01 - Cardiac therapy	C01A - Cardiac glycosides	C01AB - Scilla glycosides	C01AB51	Proscillaridin, combinations	-1
C - Cardiovascular system	C01 - Cardiac therapy	C01A - Cardiac glycosides	C01AC - Strophanthus glycosides	C01AC01	G-strophanthin	439501
C - Cardiovascular system	C01 - Cardiac therapy	C01A - Cardiac glycosides	C01AC - Strophanthus glycosides	C01AC03	Cymarin	441853
C - Cardiovascular system	C01 - Cardiac therapy	C01A - Cardiac glycosides	C01AX - Other cardiac glycosides	C01AX02	Peruvoside	12314120
C - Cardiovascular system	C01 - Cardiac therapy	C01B - Antiarrhythmics, class i and iii	C01BA - Antiarrhythmics, class ia	C01BA01	Quinidine	441074
C - Cardiovascular system	C01 - Cardiac therapy	C01B - Antiarrhythmics, class i and iii	C01BA - Antiarrhythmics, class ia	C01BA02	Procainamide	4913
C - Cardiovascular system	C01 - Cardiac therapy	C01B - Antiarrhythmics, class i and iii	C01BA - Antiarrhythmics, class ia	C01BA03	Disopyramide	3114
C - Cardiovascular system	C01 - Cardiac therapy	C01B - Antiarrhythmics, class i and iii	C01BA - Antiarrhythmics, class ia	C01BA04	Sparteine	644020
C - Cardiovascular system	C01 - Cardiac therapy	C01B - Antiarrhythmics, class i and iii	C01BA - Antiarrhythmics, class ia	C01BA05	Ajmaline	6100671
C - Cardiovascular system	C01 - Cardiac therapy	C01B - Antiarrhythmics, class i and iii	C01BA - Antiarrhythmics, class ia	C01BA08	Prajmaline	76959818
C - Cardiovascular system	C01 - Cardiac therapy	C01B - Antiarrhythmics, class i and iii	C01BA - Antiarrhythmics, class ia	C01BA12	Lorajmine	76957773
C - Cardiovascular system	C01 - Cardiac therapy	C01B - Antiarrhythmics, class i and iii	C01BA - Antiarrhythmics, class ia	C01BA13	Hydroquinidine	91503
C - Cardiovascular system	C01 - Cardiac therapy	C01B - Antiarrhythmics, class i and iii	C01BA - Antiarrhythmics, class ia	C01BA51	Quinidine, combinations excl. psycholeptics	-1
C - Cardiovascular system	C01 - Cardiac therapy	C01B - Antiarrhythmics, class i and iii	C01BA - Antiarrhythmics, class ia	C01BA71	Quinidine, combinations with psycholeptics	-1
C - Cardiovascular system	C01 - Cardiac therapy	C01B - Antiarrhythmics, class i and iii	C01BB - Antiarrhythmics, class ib	C01BB01	Lidocaine	3676
C - Cardiovascular system	C01 - Cardiac therapy	C01B - Antiarrhythmics, class i and iii	C01BB - Antiarrhythmics, class ib	C01BB02	Mexiletine	4178
C - Cardiovascular system	C01 - Cardiac therapy	C01B - Antiarrhythmics, class i and iii	C01BB - Antiarrhythmics, class ib	C01BB03	Tocainide	38945
C - Cardiovascular system	C01 - Cardiac therapy	C01B - Antiarrhythmics, class i and iii	C01BB - Antiarrhythmics, class ib	C01BB04	Aprindine	2218
C - Cardiovascular system	C01 - Cardiac therapy	C01B - Antiarrhythmics, class i and iii	C01BC - Antiarrhythmics, class ic	C01BC03	Propafenone	4932
C - Cardiovascular system	C01 - Cardiac therapy	C01B - Antiarrhythmics, class i and iii	C01BC - Antiarrhythmics, class ic	C01BC04	Flecainide	3356
C - Cardiovascular system	C01 - Cardiac therapy	C01B - Antiarrhythmics, class i and iii	C01BC - Antiarrhythmics, class ic	C01BC07	Lorcainide	42884
C - Cardiovascular system	C01 - Cardiac therapy	C01B - Antiarrhythmics, class i and iii	C01BC - Antiarrhythmics, class ic	C01BC08	Encainide	48041
C - Cardiovascular system	C01 - Cardiac therapy	C01B - Antiarrhythmics, class i and iii	C01BC - Antiarrhythmics, class ic	C01BC09	Ethacizine	107841
C - Cardiovascular system	C01 - Cardiac therapy	C01B - Antiarrhythmics, class i and iii	C01BD - Antiarrhythmics, class iii	C01BD01	Amiodarone	2157
C - Cardiovascular system	C01 - Cardiac therapy	C01B - Antiarrhythmics, class i and iii	C01BD - Antiarrhythmics, class iii	C01BD02	Bretylium tosilate	6100
C - Cardiovascular system	C01 - Cardiac therapy	C01B - Antiarrhythmics, class i and iii	C01BD - Antiarrhythmics, class iii	C01BD03	Bunaftine	36131
C - Cardiovascular system	C01 - Cardiac therapy	C01B - Antiarrhythmics, class i and iii	C01BD - Antiarrhythmics, class iii	C01BD04	Dofetilide	71329
C - Cardiovascular system	C01 - Cardiac therapy	C01B - Antiarrhythmics, class i and iii	C01BD - Antiarrhythmics, class iii	C01BD05	Ibutilide	60753
C - Cardiovascular system	C01 - Cardiac therapy	C01B - Antiarrhythmics, class i and iii	C01BD - Antiarrhythmics, class iii	C01BD06	Tedisamil	65825
C - Cardiovascular system	C01 - Cardiac therapy	C01B - Antiarrhythmics, class i and iii	C01BD - Antiarrhythmics, class iii	C01BD07	Dronedarone	208898
C - Cardiovascular system	C01 - Cardiac therapy	C01B - Antiarrhythmics, class i and iii	C01BG - Other antiarrhythmics, class i and iii	C01BG01	Moracizine	34633
C - Cardiovascular system	C01 - Cardiac therapy	C01B - Antiarrhythmics, class i and iii	C01BG - Other antiarrhythmics, class i and iii	C01BG07	Cibenzoline	2747
C - Cardiovascular system	C01 - Cardiac therapy	C01B - Antiarrhythmics, class i and iii	C01BG - Other antiarrhythmics, class i and iii	C01BG11	Vernakalant	9930049
C - Cardiovascular system	C01 - Cardiac therapy	C01C - Cardiac stimulants excl. cardiac glycosides	C01CA - Adrenergic and dopaminergic agents	C01CA01	Etilefrine	3306
C - Cardiovascular system	C01 - Cardiac therapy	C01C - Cardiac stimulants excl. cardiac glycosides	C01CA - Adrenergic and dopaminergic agents	C01CA02	Isoprenaline	3779
C - Cardiovascular system	C01 - Cardiac therapy	C01C - Cardiac stimulants excl. cardiac glycosides	C01CA - Adrenergic and dopaminergic agents	C01CA03	Norepinephrine	439260
C - Cardiovascular system	C01 - Cardiac therapy	C01C - Cardiac stimulants excl. cardiac glycosides	C01CA - Adrenergic and dopaminergic agents	C01CA04	Dopamine	681
C - Cardiovascular system	C01 - Cardiac therapy	C01C - Cardiac stimulants excl. cardiac glycosides	C01CA - Adrenergic and dopaminergic agents	C01CA05	Norfenefrine	4538
C - Cardiovascular system	C01 - Cardiac therapy	C01C - Cardiac stimulants excl. cardiac glycosides	C01CA - Adrenergic and dopaminergic agents	C01CA06	Phenylephrine	6041
C - Cardiovascular system	C01 - Cardiac therapy	C01C - Cardiac stimulants excl. cardiac glycosides	C01CA - Adrenergic and dopaminergic agents	C01CA07	Dobutamine	36811
C - Cardiovascular system	C01 - Cardiac therapy	C01C - Cardiac stimulants excl. cardiac glycosides	C01CA - Adrenergic and dopaminergic agents	C01CA08	Oxedrine	7172
C - Cardiovascular system	C01 - Cardiac therapy	C01C - Cardiac stimulants excl. cardiac glycosides	C01CA - Adrenergic and dopaminergic agents	C01CA09	Metaraminol	5906
C - Cardiovascular system	C01 - Cardiac therapy	C01C - Cardiac stimulants excl. cardiac glycosides	C01CA - Adrenergic and dopaminergic agents	C01CA10	Methoxamine	6082
C - Cardiovascular system	C01 - Cardiac therapy	C01C - Cardiac stimulants excl. cardiac glycosides	C01CA - Adrenergic and dopaminergic agents	C01CA11	Mephentermine	3677
C - Cardiovascular system	C01 - Cardiac therapy	C01C - Cardiac stimulants excl. cardiac glycosides	C01CA - Adrenergic and dopaminergic agents	C01CA12	Dimetofrine	31513
C - Cardiovascular system	C01 - Cardiac therapy	C01C - Cardiac stimulants excl. cardiac glycosides	C01CA - Adrenergic and dopaminergic agents	C01CA13	Prenalterol	42396
C - Cardiovascular system	C01 - Cardiac therapy	C01C - Cardiac stimulants excl. cardiac glycosides	C01CA - Adrenergic and dopaminergic agents	C01CA14	Dopexamine	55483
C - Cardiovascular system	C01 - Cardiac therapy	C01C - Cardiac stimulants excl. cardiac glycosides	C01CA - Adrenergic and dopaminergic agents	C01CA15	Gepefrine	219105
C - Cardiovascular system	C01 - Cardiac therapy	C01C - Cardiac stimulants excl. cardiac glycosides	C01CA - Adrenergic and dopaminergic agents	C01CA16	Ibopamine	68555
C - Cardiovascular system	C01 - Cardiac therapy	C01C - Cardiac stimulants excl. cardiac glycosides	C01CA - Adrenergic and dopaminergic agents	C01CA17	Midodrine	4195
C - Cardiovascular system	C01 - Cardiac therapy	C01C - Cardiac stimulants excl. cardiac glycosides	C01CA - Adrenergic and dopaminergic agents	C01CA18	Octopamine	4581
C - Cardiovascular system	C01 - Cardiac therapy	C01C - Cardiac stimulants excl. cardiac glycosides	C01CA - Adrenergic and dopaminergic agents	C01CA19	Fenoldopam	3341
C - Cardiovascular system	C01 - Cardiac therapy	C01C - Cardiac stimulants excl. cardiac glycosides	C01CA - Adrenergic and dopaminergic agents	C01CA21	Cafedrine	71740
C - Cardiovascular system	C01 - Cardiac therapy	C01C - Cardiac stimulants excl. cardiac glycosides	C01CA - Adrenergic and dopaminergic agents	C01CA22	Arbutamine	60789
C - Cardiovascular system	C01 - Cardiac therapy	C01C - Cardiac stimulants excl. cardiac glycosides	C01CA - Adrenergic and dopaminergic agents	C01CA23	Theodrenaline	71857
C - Cardiovascular system	C01 - Cardiac therapy	C01C - Cardiac stimulants excl. cardiac glycosides	C01CA - Adrenergic and dopaminergic agents	C01CA24	Epinephrine	5816
C - Cardiovascular system	C01 - Cardiac therapy	C01C - Cardiac stimulants excl. cardiac glycosides	C01CA - Adrenergic and dopaminergic agents	C01CA25	Amezinium metilsulfate	71926
C - Cardiovascular system	C01 - Cardiac therapy	C01C - Cardiac stimulants excl. cardiac glycosides	C01CA - Adrenergic and dopaminergic agents	C01CA26	Ephedrine	9294
C - Cardiovascular system	C01 - Cardiac therapy	C01C - Cardiac stimulants excl. cardiac glycosides	C01CA - Adrenergic and dopaminergic agents	C01CA27	Droxidopa	92974
C - Cardiovascular system	C01 - Cardiac therapy	C01C - Cardiac stimulants excl. cardiac glycosides	C01CA - Adrenergic and dopaminergic agents	C01CA28	Centhaquine	162163
C - Cardiovascular system	C01 - Cardiac therapy	C01C - Cardiac stimulants excl. cardiac glycosides	C01CA - Adrenergic and dopaminergic agents	C01CA30	Combinations	-1
C - Cardiovascular system	C01 - Cardiac therapy	C01C - Cardiac stimulants excl. cardiac glycosides	C01CA - Adrenergic and dopaminergic agents	C01CA51	Etilefrine, combinations	-1
C - Cardiovascular system	C01 - Cardiac therapy	C01C - Cardiac stimulants excl. cardiac glycosides	C01CE - Phosphodiesterase inhibitors	C01CE01	Amrinone	3698
C - Cardiovascular system	C01 - Cardiac therapy	C01C - Cardiac stimulants excl. cardiac glycosides	C01CE - Phosphodiesterase inhibitors	C01CE02	Milrinone	4197
C - Cardiovascular system	C01 - Cardiac therapy	C01C - Cardiac stimulants excl. cardiac glycosides	C01CE - Phosphodiesterase inhibitors	C01CE03	Enoximone	53708
C - Cardiovascular system	C01 - Cardiac therapy	C01C - Cardiac stimulants excl. cardiac glycosides	C01CE - Phosphodiesterase inhibitors	C01CE04	Bucladesine	9687
C - Cardiovascular system	C01 - Cardiac therapy	C01C - Cardiac stimulants excl. cardiac glycosides	C01CX - Other cardiac stimulants	C01CX06	Angiotensinamide	10351092
C - Cardiovascular system	C01 - Cardiac therapy	C01C - Cardiac stimulants excl. cardiac glycosides	C01CX - Other cardiac stimulants	C01CX07	Xamoterol	155774
C - Cardiovascular system	C01 - Cardiac therapy	C01C - Cardiac stimulants excl. cardiac glycosides	C01CX - Other cardiac stimulants	C01CX08	Levosimendan	3033825
C - Cardiovascular system	C01 - Cardiac therapy	C01C - Cardiac stimulants excl. cardiac glycosides	C01CX - Other cardiac stimulants	C01CX09	Angiotensin II	172198
C - Cardiovascular system	C01 - Cardiac therapy	C01C - Cardiac stimulants excl. cardiac glycosides	C01CX - Other cardiac stimulants	C01CX10	Omecamtiv mecarbil	11689883
C - Cardiovascular system	C01 - Cardiac therapy	C01D - Vasodilators used in cardiac diseases	C01DA - Organic nitrates	C01DA02	Glyceryl trinitrate	4510
C - Cardiovascular system	C01 - Cardiac therapy	C01D - Vasodilators used in cardiac diseases	C01DA - Organic nitrates	C01DA04	Methylpropylpropanediol dinitrate	25430
C - Cardiovascular system	C01 - Cardiac therapy	C01D - Vasodilators used in cardiac diseases	C01DA - Organic nitrates	C01DA05	Pentaerithrityl tetranitrate	6518
C - Cardiovascular system	C01 - Cardiac therapy	C01D - Vasodilators used in cardiac diseases	C01DA - Organic nitrates	C01DA07	Propatylnitrate	66261
C - Cardiovascular system	C01 - Cardiac therapy	C01D - Vasodilators used in cardiac diseases	C01DA - Organic nitrates	C01DA08	Isosorbide dinitrate	6883
C - Cardiovascular system	C01 - Cardiac therapy	C01D - Vasodilators used in cardiac diseases	C01DA - Organic nitrates	C01DA09	Trolnitrate	11499
C - Cardiovascular system	C01 - Cardiac therapy	C01D - Vasodilators used in cardiac diseases	C01DA - Organic nitrates	C01DA13	Eritrityl tetranitrate	5284553
C - Cardiovascular system	C01 - Cardiac therapy	C01D - Vasodilators used in cardiac diseases	C01DA - Organic nitrates	C01DA14	Isosorbide mononitrate	27661
C - Cardiovascular system	C01 - Cardiac therapy	C01D - Vasodilators used in cardiac diseases	C01DA - Organic nitrates	C01DA20	Organic nitrates in combination	-1
C - Cardiovascular system	C01 - Cardiac therapy	C01D - Vasodilators used in cardiac diseases	C01DA - Organic nitrates	C01DA38	Tenitramine	168009
C - Cardiovascular system	C01 - Cardiac therapy	C01D - Vasodilators used in cardiac diseases	C01DA - Organic nitrates	C01DA52	Glyceryl trinitrate, combinations	-1
C - Cardiovascular system	C01 - Cardiac therapy	C01D - Vasodilators used in cardiac diseases	C01DA - Organic nitrates	C01DA54	Methylpropylpropanediol dinitrate, combinations	-1
C - Cardiovascular system	C01 - Cardiac therapy	C01D - Vasodilators used in cardiac diseases	C01DA - Organic nitrates	C01DA55	Pentaerithrityl tetranitrate, combinations	-1
C - Cardiovascular system	C01 - Cardiac therapy	C01D - Vasodilators used in cardiac diseases	C01DA - Organic nitrates	C01DA57	Propatylnitrate, combinations	-1
C - Cardiovascular system	C01 - Cardiac therapy	C01D - Vasodilators used in cardiac diseases	C01DA - Organic nitrates	C01DA58	Isosorbide dinitrate, combinations	-1
C - Cardiovascular system	C01 - Cardiac therapy	C01D - Vasodilators used in cardiac diseases	C01DA - Organic nitrates	C01DA59	Trolnitrate, combinations	-1
C - Cardiovascular system	C01 - Cardiac therapy	C01D - Vasodilators used in cardiac diseases	C01DA - Organic nitrates	C01DA63	Eritrityl tetranitrate, combinations	-1
C - Cardiovascular system	C01 - Cardiac therapy	C01D - Vasodilators used in cardiac diseases	C01DA - Organic nitrates	C01DA70	Organic nitrates in combination with psycholeptics	-1
C - Cardiovascular system	C01 - Cardiac therapy	C01D - Vasodilators used in cardiac diseases	C01DB - Quinolone vasodilators	C01DB01	Flosequinan	4474062
C - Cardiovascular system	C01 - Cardiac therapy	C01D - Vasodilators used in cardiac diseases	C01DX - Other vasodilators used in cardiac diseases	C01DX01	Itramin tosilate	26000
C - Cardiovascular system	C01 - Cardiac therapy	C01D - Vasodilators used in cardiac diseases	C01DX - Other vasodilators used in cardiac diseases	C01DX02	Prenylamine	9801
C - Cardiovascular system	C01 - Cardiac therapy	C01D - Vasodilators used in cardiac diseases	C01DX - Other vasodilators used in cardiac diseases	C01DX03	Oxyfedrine	5489013
C - Cardiovascular system	C01 - Cardiac therapy	C01D - Vasodilators used in cardiac diseases	C01DX - Other vasodilators used in cardiac diseases	C01DX04	Benziodarone	6237
C - Cardiovascular system	C01 - Cardiac therapy	C01D - Vasodilators used in cardiac diseases	C01DX - Other vasodilators used in cardiac diseases	C01DX05	Carbocromen	12604
C - Cardiovascular system	C01 - Cardiac therapy	C01D - Vasodilators used in cardiac diseases	C01DX - Other vasodilators used in cardiac diseases	C01DX06	Hexobendine	5777
C - Cardiovascular system	C01 - Cardiac therapy	C01D - Vasodilators used in cardiac diseases	C01DX - Other vasodilators used in cardiac diseases	C01DX07	Etafenone	3275
C - Cardiovascular system	C01 - Cardiac therapy	C01D - Vasodilators used in cardiac diseases	C01DX - Other vasodilators used in cardiac diseases	C01DX08	Heptaminol	3590
C - Cardiovascular system	C01 - Cardiac therapy	C01D - Vasodilators used in cardiac diseases	C01DX - Other vasodilators used in cardiac diseases	C01DX09	Imolamine	27501
C - Cardiovascular system	C01 - Cardiac therapy	C01D - Vasodilators used in cardiac diseases	C01DX - Other vasodilators used in cardiac diseases	C01DX10	Dilazep	3074
C - Cardiovascular system	C01 - Cardiac therapy	C01D - Vasodilators used in cardiac diseases	C01DX - Other vasodilators used in cardiac diseases	C01DX11	Trapidil	5531
C - Cardiovascular system	C01 - Cardiac therapy	C01D - Vasodilators used in cardiac diseases	C01DX - Other vasodilators used in cardiac diseases	C01DX12	Molsidomine	5353788
C - Cardiovascular system	C01 - Cardiac therapy	C01D - Vasodilators used in cardiac diseases	C01DX - Other vasodilators used in cardiac diseases	C01DX13	Efloxate	8395
C - Cardiovascular system	C01 - Cardiac therapy	C01D - Vasodilators used in cardiac diseases	C01DX - Other vasodilators used in cardiac diseases	C01DX14	Cinepazet	6434395
C - Cardiovascular system	C01 - Cardiac therapy	C01D - Vasodilators used in cardiac diseases	C01DX - Other vasodilators used in cardiac diseases	C01DX15	Cloridarol	71132
C - Cardiovascular system	C01 - Cardiac therapy	C01D - Vasodilators used in cardiac diseases	C01DX - Other vasodilators used in cardiac diseases	C01DX16	Nicorandil	47528
C - Cardiovascular system	C01 - Cardiac therapy	C01D - Vasodilators used in cardiac diseases	C01DX - Other vasodilators used in cardiac diseases	C01DX18	Linsidomine	5219
C - Cardiovascular system	C01 - Cardiac therapy	C01D - Vasodilators used in cardiac diseases	C01DX - Other vasodilators used in cardiac diseases	C01DX19	Nesiritide	53395955
C - Cardiovascular system	C01 - Cardiac therapy	C01D - Vasodilators used in cardiac diseases	C01DX - Other vasodilators used in cardiac diseases	C01DX21	Serelaxin	71300755
C - Cardiovascular system	C01 - Cardiac therapy	C01D - Vasodilators used in cardiac diseases	C01DX - Other vasodilators used in cardiac diseases	C01DX22	Vericiguat	54674461
C - Cardiovascular system	C01 - Cardiac therapy	C01D - Vasodilators used in cardiac diseases	C01DX - Other vasodilators used in cardiac diseases	C01DX51	Itramin tosilate, combinations	-1
C - Cardiovascular system	C01 - Cardiac therapy	C01D - Vasodilators used in cardiac diseases	C01DX - Other vasodilators used in cardiac diseases	C01DX52	Prenylamine, combinations	-1
C - Cardiovascular system	C01 - Cardiac therapy	C01D - Vasodilators used in cardiac diseases	C01DX - Other vasodilators used in cardiac diseases	C01DX53	Oxyfedrine, combinations	-1
C - Cardiovascular system	C01 - Cardiac therapy	C01D - Vasodilators used in cardiac diseases	C01DX - Other vasodilators used in cardiac diseases	C01DX54	Benziodarone, combinations	-1
C - Cardiovascular system	C01 - Cardiac therapy	C01E - Other cardiac preparations	C01EA - Prostaglandins	C01EA01	Alprostadil	5280723
C - Cardiovascular system	C01 - Cardiac therapy	C01E - Other cardiac preparations	C01EB - Other cardiac preparations	C01EB02	Camphora	159055
C - Cardiovascular system	C01 - Cardiac therapy	C01E - Other cardiac preparations	C01EB - Other cardiac preparations	C01EB03	Indometacin	3715
C - Cardiovascular system	C01 - Cardiac therapy	C01E - Other cardiac preparations	C01EB - Other cardiac preparations	C01EB04	Crataegus glycosides	-1
C - Cardiovascular system	C01 - Cardiac therapy	C01E - Other cardiac preparations	C01EB - Other cardiac preparations	C01EB05	Creatinolfosfate	23342
C - Cardiovascular system	C01 - Cardiac therapy	C01E - Other cardiac preparations	C01EB - Other cardiac preparations	C01EB06	Fosfocreatine	9548602
C - Cardiovascular system	C01 - Cardiac therapy	C01E - Other cardiac preparations	C01EB - Other cardiac preparations	C01EB07	Fructose 1,6-diphosphate	718
C - Cardiovascular system	C01 - Cardiac therapy	C01E - Other cardiac preparations	C01EB - Other cardiac preparations	C01EB09	Ubidecarenone	5281915
C - Cardiovascular system	C01 - Cardiac therapy	C01E - Other cardiac preparations	C01EB - Other cardiac preparations	C01EB10	Adenosine	60961
C - Cardiovascular system	C01 - Cardiac therapy	C01E - Other cardiac preparations	C01EB - Other cardiac preparations	C01EB11	Tiracizine	71264
C - Cardiovascular system	C01 - Cardiac therapy	C01E - Other cardiac preparations	C01EB - Other cardiac preparations	C01EB13	Acadesine	17513
C - Cardiovascular system	C01 - Cardiac therapy	C01E - Other cardiac preparations	C01EB - Other cardiac preparations	C01EB15	Trimetazidine	21109
C - Cardiovascular system	C01 - Cardiac therapy	C01E - Other cardiac preparations	C01EB - Other cardiac preparations	C01EB16	Ibuprofen	3672
C - Cardiovascular system	C01 - Cardiac therapy	C01E - Other cardiac preparations	C01EB - Other cardiac preparations	C01EB17	Ivabradine	132999
C - Cardiovascular system	C01 - Cardiac therapy	C01E - Other cardiac preparations	C01EB - Other cardiac preparations	C01EB18	Ranolazine	56959
C - Cardiovascular system	C01 - Cardiac therapy	C01E - Other cardiac preparations	C01EB - Other cardiac preparations	C01EB21	Regadenoson	219024
C - Cardiovascular system	C01 - Cardiac therapy	C01E - Other cardiac preparations	C01EB - Other cardiac preparations	C01EB22	Meldonium	123868
C - Cardiovascular system	C01 - Cardiac therapy	C01E - Other cardiac preparations	C01EB - Other cardiac preparations	C01EB23	Tiazotic acid	254566
C - Cardiovascular system	C01 - Cardiac therapy	C01E - Other cardiac preparations	C01EB - Other cardiac preparations	C01EB24	Mavacamten	117761397
C - Cardiovascular system	C02 - Antihypertensives	C02A - Antiadrenergic agents, centrally acting	C02AA - Rauwolfia alkaloids	C02AA01	Rescinnamine	5280954
C - Cardiovascular system	C02 - Antihypertensives	C02A - Antiadrenergic agents, centrally acting	C02AA - Rauwolfia alkaloids	C02AA02	Reserpine	5770
C - Cardiovascular system	C02 - Antihypertensives	C02A - Antiadrenergic agents, centrally acting	C02AA - Rauwolfia alkaloids	C02AA03	Combinations of rauwolfia alkaloids	-1
C - Cardiovascular system	C02 - Antihypertensives	C02A - Antiadrenergic agents, centrally acting	C02AA - Rauwolfia alkaloids	C02AA04	Rauwolfia alkaloids, whole root	-1
C - Cardiovascular system	C02 - Antihypertensives	C02A - Antiadrenergic agents, centrally acting	C02AA - Rauwolfia alkaloids	C02AA05	Deserpidine	8550
C - Cardiovascular system	C02 - Antihypertensives	C02A - Antiadrenergic agents, centrally acting	C02AA - Rauwolfia alkaloids	C02AA06	Methoserpidine	71798
C - Cardiovascular system	C02 - Antihypertensives	C02A - Antiadrenergic agents, centrally acting	C02AA - Rauwolfia alkaloids	C02AA07	Bietaserpine	20054848
C - Cardiovascular system	C02 - Antihypertensives	C02A - Antiadrenergic agents, centrally acting	C02AA - Rauwolfia alkaloids	C02AA52	Reserpine, combinations	-1
C - Cardiovascular system	C02 - Antihypertensives	C02A - Antiadrenergic agents, centrally acting	C02AA - Rauwolfia alkaloids	C02AA53	Combinations of rauwolfia alkoloids, combinations	-1
C - Cardiovascular system	C02 - Antihypertensives	C02A - Antiadrenergic agents, centrally acting	C02AA - Rauwolfia alkaloids	C02AA57	Bietaserpine, combinations	-1
C - Cardiovascular system	C02 - Antihypertensives	C02A - Antiadrenergic agents, centrally acting	C02AB - Methyldopa	C02AB01	Methyldopa (levorotatory)	38853
C - Cardiovascular system	C02 - Antihypertensives	C02A - Antiadrenergic agents, centrally acting	C02AB - Methyldopa	C02AB02	Methyldopa (racemic)	4138
C - Cardiovascular system	C02 - Antihypertensives	C02A - Antiadrenergic agents, centrally acting	C02AC - Imidazoline receptor agonists	C02AC01	Clonidine	2803
C - Cardiovascular system	C02 - Antihypertensives	C02A - Antiadrenergic agents, centrally acting	C02AC - Imidazoline receptor agonists	C02AC02	Guanfacine	3519
C - Cardiovascular system	C02 - Antihypertensives	C02A - Antiadrenergic agents, centrally acting	C02AC - Imidazoline receptor agonists	C02AC04	Tolonidine	72138
C - Cardiovascular system	C02 - Antihypertensives	C02A - Antiadrenergic agents, centrally acting	C02AC - Imidazoline receptor agonists	C02AC05	Moxonidine	4810
C - Cardiovascular system	C02 - Antihypertensives	C02A - Antiadrenergic agents, centrally acting	C02AC - Imidazoline receptor agonists	C02AC06	Rilmenidine	68712
C - Cardiovascular system	C02 - Antihypertensives	C02B - Antiadrenergic agents, ganglion-blocking	C02BA - Sulfonium derivatives	C02BA01	Trimetaphan	23576
C - Cardiovascular system	C02 - Antihypertensives	C03B - Antiadrenergic agents, ganglion-blocking	C02BB - Secondary and tertiary amines	C02BB01	Mecamylamine	4032
C - Cardiovascular system	C02 - Antihypertensives	C02C - Antiadrenergic agents, peripherally acting	C02CA - Alpha-adrenoreceptor antagonists	C02CA01	Prazosin	4893
C - Cardiovascular system	C02 - Antihypertensives	C02C - Antiadrenergic agents, peripherally acting	C02CA - Alpha-adrenoreceptor antagonists	C02CA02	Indoramin	33625
C - Cardiovascular system	C02 - Antihypertensives	C02C - Antiadrenergic agents, peripherally acting	C02CA - Alpha-adrenoreceptor antagonists	C02CA03	Trimazosin	37264
C - Cardiovascular system	C02 - Antihypertensives	C02C - Antiadrenergic agents, peripherally acting	C02CA - Alpha-adrenoreceptor antagonists	C02CA04	Doxazosin	3157
C - Cardiovascular system	C02 - Antihypertensives	C02C - Antiadrenergic agents, peripherally acting	C02CA - Alpha-adrenoreceptor antagonists	C02CA06	Urapidil	5639
C - Cardiovascular system	C02 - Antihypertensives	C02C - Antiadrenergic agents, peripherally acting	C02CC - Guanidine derivatives	C02CC01	Betanidine	2368
C - Cardiovascular system	C02 - Antihypertensives	C02C - Antiadrenergic agents, peripherally acting	C02CC - Guanidine derivatives	C02CC02	Guanethidine	3518
C - Cardiovascular system	C02 - Antihypertensives	C02C - Antiadrenergic agents, peripherally acting	C02CC - Guanidine derivatives	C02CC03	Guanoxan	16564
C - Cardiovascular system	C02 - Antihypertensives	C02C - Antiadrenergic agents, peripherally acting	C02CC - Guanidine derivatives	C02CC04	Debrisoquine	2966
C - Cardiovascular system	C02 - Antihypertensives	C02C - Antiadrenergic agents, peripherally acting	C02CC - Guanidine derivatives	C02CC05	Guanoclor	71835
C - Cardiovascular system	C02 - Antihypertensives	C02C - Antiadrenergic agents, peripherally acting	C02CC - Guanidine derivatives	C02CC06	Guanazodine	36054
C - Cardiovascular system	C02 - Antihypertensives	C02C - Antiadrenergic agents, peripherally acting	C02CC - Guanidine derivatives	C02CC07	Guanoxabenz	9567831
C - Cardiovascular system	C02 - Antihypertensives	C02D - Arteriolar smooth muscle, agents acting on	C02DA - Thiazide derivatives	C02DA01	Diazoxide	3019
C - Cardiovascular system	C02 - Antihypertensives	C02D - Arteriolar smooth muscle, agents acting on	C02DB - Hydrazinophthalazine derivatives	C02DB01	Dihydralazine	10230
C - Cardiovascular system	C02 - Antihypertensives	C02D - Arteriolar smooth muscle, agents acting on	C02DB - Hydrazinophthalazine derivatives	C02DB02	Hydralazine	3637
C - Cardiovascular system	C02 - Antihypertensives	C02D - Arteriolar smooth muscle, agents acting on	C02DB - Hydrazinophthalazine derivatives	C02DB03	Endralazine	47608
C - Cardiovascular system	C02 - Antihypertensives	C02D - Arteriolar smooth muscle, agents acting on	C02DB - Hydrazinophthalazine derivatives	C02DB04	Cadralazine	2515
C - Cardiovascular system	C02 - Antihypertensives	C02D - Arteriolar smooth muscle, agents acting on	C02DC - Pyrimidine derivatives	C02DC01	Minoxidil	4201
C - Cardiovascular system	C02 - Antihypertensives	C02D - Arteriolar smooth muscle, agents acting on	C02DD - Nitroferricyanide derivatives	C02DD01	Nitroprusside	124081848
C - Cardiovascular system	C02 - Antihypertensives	C02D - Arteriolar smooth muscle, agents acting on	C02DG - Guanidine derivatives	C02DG01	Pinacidil	4826
C - Cardiovascular system	C02 - Antihypertensives	C02K - Other antihypertensives	C02KA - Alkaloids, excl. rauwolfia	C02KA01	Veratrum	-1
C - Cardiovascular system	C02 - Antihypertensives	C02K - Other antihypertensives	C02KB - Tyrosine hydroxylase inhibitors	C02KB01	Metirosine	441350
C - Cardiovascular system	C02 - Antihypertensives	C02K - Other antihypertensives	C02KC - Mao inhibitors	C02KC01	Pargyline	4688
C - Cardiovascular system	C02 - Antihypertensives	C02K - Other antihypertensives	C02KD - Serotonin antagonists	C02KD01	Ketanserin	3822
C - Cardiovascular system	C02 - Antihypertensives	C02K - Other antihypertensives	C02KN - Other antihypertensives	C02KN01	Aprocitentan	25099191
C - Cardiovascular system	C02 - Antihypertensives	C02K - Other antihypertensives	C02KX - Antihypertensives for pulmonary arterial hypertension	C02KX01	Bosentan	104865
C - Cardiovascular system	C02 - Antihypertensives	C02K - Other antihypertensives	C02KX - Antihypertensives for pulmonary arterial hypertension	C02KX02	Ambrisentan	6918493
C - Cardiovascular system	C02 - Antihypertensives	C02K - Other antihypertensives	C02KX - Antihypertensives for pulmonary arterial hypertension	C02KX03	Sitaxentan	216235
C - Cardiovascular system	C02 - Antihypertensives	C02K - Other antihypertensives	C02KX - Antihypertensives for pulmonary arterial hypertension	C02KX04	Macitentan	16004692
C - Cardiovascular system	C02 - Antihypertensives	C02K - Other antihypertensives	C02KX - Antihypertensives for pulmonary arterial hypertension	C02KX05	Riociguat	11304743
C - Cardiovascular system	C02 - Antihypertensives	C02K - Other antihypertensives	C02KX - Antihypertensives for pulmonary arterial hypertension	C02KX52	Ambrisentan and tadalafil	-1
C - Cardiovascular system	C02 - Antihypertensives	C02K - Other antihypertensives	C02KX - Antihypertensives for pulmonary arterial hypertension	C02KX54	Macitentan and tadalafil	-1
C - Cardiovascular system	C02 - Antihypertensives	C02L - Antihypertensives and diuretics in combination	C02LA - Rauwolfia alkaloids and diuretics in combination	C02LA01	Reserpine and diuretics	-1
C - Cardiovascular system	C02 - Antihypertensives	C02L - Antihypertensives and diuretics in combination	C02LA - Rauwolfia alkaloids and diuretics in combination	C02LA02	Rescinnamine and diuretics	-1
C - Cardiovascular system	C02 - Antihypertensives	C02L - Antihypertensives and diuretics in combination	C02LA - Rauwolfia alkaloids and diuretics in combination	C02LA03	Deserpidine and diuretics	-1
C - Cardiovascular system	C02 - Antihypertensives	C02L - Antihypertensives and diuretics in combination	C02LA - Rauwolfia alkaloids and diuretics in combination	C02LA04	Methoserpidine and diuretics	-1
C - Cardiovascular system	C02 - Antihypertensives	C02L - Antihypertensives and diuretics in combination	C02LA - Rauwolfia alkaloids and diuretics in combination	C02LA07	Bietaserpine and diuretics	-1
C - Cardiovascular system	C02 - Antihypertensives	C02L - Antihypertensives and diuretics in combination	C02LA - Rauwolfia alkaloids and diuretics in combination	C02LA08	Rauwolfia alkaloids, whole root and diuretics	-1
C - Cardiovascular system	C02 - Antihypertensives	C02L - Antihypertensives and diuretics in combination	C02LA - Rauwolfia alkaloids and diuretics in combination	C02LA09	Syrosingopine and diuretics	-1
C - Cardiovascular system	C02 - Antihypertensives	C02L - Antihypertensives and diuretics in combination	C02LA - Rauwolfia alkaloids and diuretics in combination	C02LA50	Combination of rauwolfia alkaloids and diuretics incl. other combinations	-1
C - Cardiovascular system	C02 - Antihypertensives	C02L - Antihypertensives and diuretics in combination	C02LA - Rauwolfia alkaloids and diuretics in combination	C02LA51	Reserpine and diuretics, combinations with other drugs	-1
C - Cardiovascular system	C02 - Antihypertensives	C02L - Antihypertensives and diuretics in combination	C02LA - Rauwolfia alkaloids and diuretics in combination	C02LA52	Rescinnamine and diuretics, combinations with other drugs	-1
C - Cardiovascular system	C02 - Antihypertensives	C02L - Antihypertensives and diuretics in combination	C02LA - Rauwolfia alkaloids and diuretics in combination	C02LA71	Reserpine and diuretics, combinations with psycholeptics	-1
C - Cardiovascular system	C02 - Antihypertensives	C02L - Antihypertensives and diuretics in combination	C02LB - Methyldopa and diuretics in combination	C02LB01	Methyldopa (levorotatory) and diuretics	-1
C - Cardiovascular system	C02 - Antihypertensives	C02L - Antihypertensives and diuretics in combination	C02LC - Imidazoline receptor agonists in combination with diuretics	C02LC01	Clonidine and diuretics	-1
C - Cardiovascular system	C02 - Antihypertensives	C02L - Antihypertensives and diuretics in combination	C02LC - Imidazoline receptor agonists in combination with diuretics	C02LC05	Moxonidine and diuretics	-1
C - Cardiovascular system	C02 - Antihypertensives	C02L - Antihypertensives and diuretics in combination	C02LC - Imidazoline receptor agonists in combination with diuretics	C02LC51	Clonidine and diuretics, combinations with other drugs	-1
C - Cardiovascular system	C02 - Antihypertensives	C02L - Antihypertensives and diuretics in combination	C02LE - Alpha-adrenoreceptor antagonists and diuretics	C02LE01	Prazosin and diuretics	-1
C - Cardiovascular system	C02 - Antihypertensives	C02L - Antihypertensives and diuretics in combination	C02LF - Guanidine derivatives and diuretics	C02LF01	Guanethidine and diuretics	-1
C - Cardiovascular system	C02 - Antihypertensives	C02L - Antihypertensives and diuretics in combination	C02LG - Hydrazinophthalazine derivatives and diuretics	C02LG01	Dihydralazine and diuretics	-1
C - Cardiovascular system	C02 - Antihypertensives	C02L - Antihypertensives and diuretics in combination	C02LG - Hydrazinophthalazine derivatives and diuretics	C02LG02	Hydralazine and diuretics	-1
C - Cardiovascular system	C02 - Antihypertensives	C02L - Antihypertensives and diuretics in combination	C02LG - Hydrazinophthalazine derivatives and diuretics	C02LG03	Picodralazine and diuretics	-1
C - Cardiovascular system	C02 - Antihypertensives	C02L - Antihypertensives and diuretics in combination	C02LG - Hydrazinophthalazine derivatives and diuretics	C02LG51	Dihydralazine and diuretics, combinations with other drugs	-1
C - Cardiovascular system	C02 - Antihypertensives	C02L - Antihypertensives and diuretics in combination	C02LG - Hydrazinophthalazine derivatives and diuretics	C02LG73	Picodralazine and diuretics, combinations with psycholeptics	-1
C - Cardiovascular system	C02 - Antihypertensives	C02L - Antihypertensives and diuretics in combination	C02LK - Alkaloids, excl. rauwolfia, in combination with diuretics	C02LK01	Veratrum and diuretics	-1
C - Cardiovascular system	C02 - Antihypertensives	C02L - Antihypertensives and diuretics in combination	C02LL - Mao inhibitors and diuretics	C02LL01	Pargyline and diuretics	-1
C - Cardiovascular system	C02 - Antihypertensives	C02L - Antihypertensives and diuretics in combination	C02LX - Other antihypertensives and diuretics	C02LX01	Pinacidil and diuretics	-1
C - Cardiovascular system	C03 - Diuretics	C03A - Low-ceiling diuretics, thiazides	C03AA - Thiazides, plain	C03AA01	Bendroflumethiazide	2315
C - Cardiovascular system	C03 - Diuretics	C03A - Low-ceiling diuretics, thiazides	C03AA - Thiazides, plain	C03AA02	Hydroflumethiazide	3647
C - Cardiovascular system	C03 - Diuretics	C03A - Low-ceiling diuretics, thiazides	C03AA - Thiazides, plain	C03AA03	Hydrochlorothiazide	3639
C - Cardiovascular system	C03 - Diuretics	C03A - Low-ceiling diuretics, thiazides	C03AA - Thiazides, plain	C03AA04	Chlorothiazide	2720
C - Cardiovascular system	C03 - Diuretics	C03A - Low-ceiling diuretics, thiazides	C03AA - Thiazides, plain	C03AA05	Polythiazide	-1
C - Cardiovascular system	C03 - Diuretics	C03A - Low-ceiling diuretics, thiazides	C03AA - Thiazides, plain	C03AA06	Trichlormethiazide	5560
C - Cardiovascular system	C03 - Diuretics	C03A - Low-ceiling diuretics, thiazides	C03AA - Thiazides, plain	C03AA07	Cyclopenthiazide	2904
C - Cardiovascular system	C03 - Diuretics	C03A - Low-ceiling diuretics, thiazides	C03AA - Thiazides, plain	C03AA08	Methyclothiazide	4121
C - Cardiovascular system	C03 - Diuretics	C03A - Low-ceiling diuretics, thiazides	C03AA - Thiazides, plain	C03AA09	Cyclothiazide	2910
C - Cardiovascular system	C03 - Diuretics	C03A - Low-ceiling diuretics, thiazides	C03AA - Thiazides, plain	C03AA13	Mebutizide	71652
C - Cardiovascular system	C03 - Diuretics	C03A - Low-ceiling diuretics, thiazides	C03AB - Thiazides and potassium in combination	C03AB01	Bendroflumethiazide and potassium	-1
C - Cardiovascular system	C03 - Diuretics	C03A - Low-ceiling diuretics, thiazides	C03AB - Thiazides and potassium in combination	C03AB02	Hydroflumethiazide and potassium	-1
C - Cardiovascular system	C03 - Diuretics	C03A - Low-ceiling diuretics, thiazides	C03AB - Thiazides and potassium in combination	C03AB03	Hydrochlorothiazide and potassium	-1
C - Cardiovascular system	C03 - Diuretics	C03A - Low-ceiling diuretics, thiazides	C03AB - Thiazides and potassium in combination	C03AB04	Chlorothiazide and potassium	-1
C - Cardiovascular system	C03 - Diuretics	C03A - Low-ceiling diuretics, thiazides	C03AB - Thiazides and potassium in combination	C03AB05	Polythiazide and potassium	-1
C - Cardiovascular system	C03 - Diuretics	C03A - Low-ceiling diuretics, thiazides	C03AB - Thiazides and potassium in combination	C03AB06	Trichlormethiazide and potassium	-1
C - Cardiovascular system	C03 - Diuretics	C03A - Low-ceiling diuretics, thiazides	C03AB - Thiazides and potassium in combination	C03AB07	Cyclopenthiazide and potassium	-1
C - Cardiovascular system	C03 - Diuretics	C03A - Low-ceiling diuretics, thiazides	C03AB - Thiazides and potassium in combination	C03AB08	Methyclothiazide and potassium	-1
C - Cardiovascular system	C03 - Diuretics	C03A - Low-ceiling diuretics, thiazides	C03AB - Thiazides and potassium in combination	C03AB09	Cyclothiazide and potassium	-1
C - Cardiovascular system	C03 - Diuretics	C03A - Low-ceiling diuretics, thiazides	C03AH - Thiazides, combinations with psycholeptics and/or analgesics	C03AH01	Chlorothiazide, combinations	-1
C - Cardiovascular system	C03 - Diuretics	C03A - Low-ceiling diuretics, thiazides	C03AH - Thiazides, combinations with psycholeptics and/or analgesics	C03AH02	Hydroflumethiazide, combinations	-1
C - Cardiovascular system	C03 - Diuretics	C03A - Low-ceiling diuretics, thiazides	C03AX - Thiazides, combinations with other drugs	C03AX01	Hydrochlorothiazide, combinations	-1
C - Cardiovascular system	C03 - Diuretics	C03B - Low-ceiling diuretics, excl. thiazides	C03BA - Sulfonamides, plain	C03BA02	Quinethazone	6307
C - Cardiovascular system	C03 - Diuretics	C03B - Low-ceiling diuretics, excl. thiazides	C03BA - Sulfonamides, plain	C03BA03	Clopamide	12492
C - Cardiovascular system	C03 - Diuretics	C03B - Low-ceiling diuretics, excl. thiazides	C03BA - Sulfonamides, plain	C03BA04	Chlortalidone	2732
C - Cardiovascular system	C03 - Diuretics	C03B - Low-ceiling diuretics, excl. thiazides	C03BA - Sulfonamides, plain	C03BA05	Mefruside	4047
C - Cardiovascular system	C03 - Diuretics	C03B - Low-ceiling diuretics, excl. thiazides	C03BA - Sulfonamides, plain	C03BA07	Clofenamide	69594
C - Cardiovascular system	C03 - Diuretics	C03B - Low-ceiling diuretics, excl. thiazides	C03BA - Sulfonamides, plain	C03BA08	Metolazone	4170
C - Cardiovascular system	C03 - Diuretics	C03B - Low-ceiling diuretics, excl. thiazides	C03BA - Sulfonamides, plain	C03BA09	Meticrane	4165
C - Cardiovascular system	C03 - Diuretics	C03B - Low-ceiling diuretics, excl. thiazides	C03BA - Sulfonamides, plain	C03BA10	Xipamide	26618
C - Cardiovascular system	C03 - Diuretics	C03B - Low-ceiling diuretics, excl. thiazides	C03BA - Sulfonamides, plain	C03BA11	Indapamide	3702
C - Cardiovascular system	C03 - Diuretics	C03B - Low-ceiling diuretics, excl. thiazides	C03BA - Sulfonamides, plain	C03BA12	Clorexolone	16473
C - Cardiovascular system	C03 - Diuretics	C03B - Low-ceiling diuretics, excl. thiazides	C03BA - Sulfonamides, plain	C03BA13	Fenquizone	68548
C - Cardiovascular system	C03 - Diuretics	C03B - Low-ceiling diuretics, excl. thiazides	C03BA - Sulfonamides, plain	C03BA82	Clorexolone, combinations with psycholeptics	-1
C - Cardiovascular system	C03 - Diuretics	C03B - Low-ceiling diuretics, excl. thiazides	C03BB - Sulfonamides and potassium in combination	C03BB02	Quinethazone and potassium	-1
C - Cardiovascular system	C03 - Diuretics	C03B - Low-ceiling diuretics, excl. thiazides	C03BB - Sulfonamides and potassium in combination	C03BB03	Clopamide and potassium	-1
C - Cardiovascular system	C03 - Diuretics	C03B - Low-ceiling diuretics, excl. thiazides	C03BB - Sulfonamides and potassium in combination	C03BB04	Chlortalidone and potassium	-1
C - Cardiovascular system	C03 - Diuretics	C03B - Low-ceiling diuretics, excl. thiazides	C03BB - Sulfonamides and potassium in combination	C03BB05	Mefruside and potassium	-1
C - Cardiovascular system	C03 - Diuretics	C03B - Low-ceiling diuretics, excl. thiazides	C03BB - Sulfonamides and potassium in combination	C03BB07	Clofenamide and potassium	-1
C - Cardiovascular system	C03 - Diuretics	C03B - Low-ceiling diuretics, excl. thiazides	C03BC - Mercurial diuretics	C03BC01	Mersalyl	23690449
C - Cardiovascular system	C03 - Diuretics	C03B - Low-ceiling diuretics, excl. thiazides	C03BD - Xanthine derivatives	C03BD01	Theobromine	5429
C - Cardiovascular system	C03 - Diuretics	C03B - Low-ceiling diuretics, excl. thiazides	C03BX - Other low-ceiling diuretics	C03BX03	Cicletanine	54910
C - Cardiovascular system	C03 - Diuretics	C03C - High-ceiling diuretics	C03CA - Sulfonamides, plain	C03CA01	Furosemide	3440
C - Cardiovascular system	C03 - Diuretics	C03C - High-ceiling diuretics	C03CA - Sulfonamides, plain	C03CA02	Bumetanide	2471
C - Cardiovascular system	C03 - Diuretics	C03C - High-ceiling diuretics	C03CA - Sulfonamides, plain	C03CA03	Piretanide	4849
C - Cardiovascular system	C03 - Diuretics	C03C - High-ceiling diuretics	C03CA - Sulfonamides, plain	C03CA04	Torasemide	41781
C - Cardiovascular system	C03 - Diuretics	C03C - High-ceiling diuretics	C03CB - Sulfonamides and potassium in combination	C03CB01	Furosemide and potassium	-1
C - Cardiovascular system	C03 - Diuretics	C03C - High-ceiling diuretics	C03CB - Sulfonamides and potassium in combination	C03CB02	Bumetanide and potassium	-1
C - Cardiovascular system	C03 - Diuretics	C03C - High-ceiling diuretics	C03CC - Aryloxyacetic acid derivatives	C03CC01	Etacrynic acid	3278
C - Cardiovascular system	C03 - Diuretics	C03C - High-ceiling diuretics	C03CC - Aryloxyacetic acid derivatives	C03CC02	Tienilic acid	38409
C - Cardiovascular system	C03 - Diuretics	C03C - High-ceiling diuretics	C03CD - Pyrazolone derivatives	C03CD01	Muzolimine	41386
C - Cardiovascular system	C03 - Diuretics	C03C - High-ceiling diuretics	C03CX - Other high-ceiling diuretics	C03CX01	Etozolin	5743585
C - Cardiovascular system	C03 - Diuretics	C03D - Aldosterone antagonists and other potassium-sparing agents	C03DA - Aldosterone antagonists	C03DA01	Spironolactone	5833
C - Cardiovascular system	C03 - Diuretics	C03D - Aldosterone antagonists and other potassium-sparing agents	C03DA - Aldosterone antagonists	C03DA02	Potassium canrenoate	23671691
C - Cardiovascular system	C03 - Diuretics	C03D - Aldosterone antagonists and other potassium-sparing agents	C03DA - Aldosterone antagonists	C03DA03	Canrenone	13789
C - Cardiovascular system	C03 - Diuretics	C03D - Aldosterone antagonists and other potassium-sparing agents	C03DA - Aldosterone antagonists	C03DA04	Eplerenone	443872
C - Cardiovascular system	C03 - Diuretics	C03D - Aldosterone antagonists and other potassium-sparing agents	C03DA - Aldosterone antagonists	C03DA05	Finerenone	60150535
C - Cardiovascular system	C03 - Diuretics	C03D - Aldosterone antagonists and other potassium-sparing agents	C03DB - Other potassium-sparing agents	C03DB01	Amiloride	16231
C - Cardiovascular system	C03 - Diuretics	C03D - Aldosterone antagonists and other potassium-sparing agents	C03DB - Other potassium-sparing agents	C03DB02	Triamterene	5546
C - Cardiovascular system	C03 - Diuretics	C03E - Diuretics and potassium-sparing agents in combination	C03EA - Low-ceiling diuretics and potassium-sparing agents	C03EA01	Hydrochlorothiazide and potassium-sparing agents	-1
C - Cardiovascular system	C03 - Diuretics	C03E - Diuretics and potassium-sparing agents in combination	C03EA - Low-ceiling diuretics and potassium-sparing agents	C03EA02	Trichlormethiazide and potassium-sparing agents	-1
C - Cardiovascular system	C03 - Diuretics	C03E - Diuretics and potassium-sparing agents in combination	C03EA - Low-ceiling diuretics and potassium-sparing agents	C03EA03	Epitizide and potassium-sparing agents	-1
C - Cardiovascular system	C03 - Diuretics	C03E - Diuretics and potassium-sparing agents in combination	C03EA - Low-ceiling diuretics and potassium-sparing agents	C03EA04	Altizide and potassium-sparing agents	-1
C - Cardiovascular system	C03 - Diuretics	C03E - Diuretics and potassium-sparing agents in combination	C03EA - Low-ceiling diuretics and potassium-sparing agents	C03EA05	Mebutizide and potassium-sparing agents	-1
C - Cardiovascular system	C03 - Diuretics	C03E - Diuretics and potassium-sparing agents in combination	C03EA - Low-ceiling diuretics and potassium-sparing agents	C03EA06	Chlortalidone and potassium-sparing agents	-1
C - Cardiovascular system	C03 - Diuretics	C03E - Diuretics and potassium-sparing agents in combination	C03EA - Low-ceiling diuretics and potassium-sparing agents	C03EA07	Cyclopenthiazide and potassium-sparing agents	-1
C - Cardiovascular system	C03 - Diuretics	C03E - Diuretics and potassium-sparing agents in combination	C03EA - Low-ceiling diuretics and potassium-sparing agents	C03EA12	Metolazone and potassium-sparing agents	-1
C - Cardiovascular system	C03 - Diuretics	C03E - Diuretics and potassium-sparing agents in combination	C03EA - Low-ceiling diuretics and potassium-sparing agents	C03EA13	Bendroflumethiazide and potassium-sparing agents	-1
C - Cardiovascular system	C03 - Diuretics	C03E - Diuretics and potassium-sparing agents in combination	C03EA - Low-ceiling diuretics and potassium-sparing agents	C03EA14	Butizide and potassium-sparing agents	-1
C - Cardiovascular system	C03 - Diuretics	C03E - Diuretics and potassium-sparing agents in combination	C03EB - High-ceiling diuretics and potassium-sparing agents	C03EB01	Furosemide and potassium-sparing agents	-1
C - Cardiovascular system	C03 - Diuretics	C03E - Diuretics and potassium-sparing agents in combination	C03EB - High-ceiling diuretics and potassium-sparing agents	C03EB02	Bumetanide and potassium-sparing agents	-1
C - Cardiovascular system	C03 - Diuretics	C03X - Other diuretics	C03XA - Vasopressin antagonists	C03XA01	Tolvaptan	216237
C - Cardiovascular system	C03 - Diuretics	C03X - Other diuretics	C03XA - Vasopressin antagonists	C03XA02	Conivaptan	151171
C - Cardiovascular system	C04 - Peripheral vasodilators	C04A - Peripheral vasodilators	C04AA - 2-amino-1-phenylethanol derivatives	C04AA01	Isoxsuprine	3783
C - Cardiovascular system	C04 - Peripheral vasodilators	C04A - Peripheral vasodilators	C04AA - 2-amino-1-phenylethanol derivatives	C04AA02	Buphenine	4567
C - Cardiovascular system	C04 - Peripheral vasodilators	C04A - Peripheral vasodilators	C04AA - 2-amino-1-phenylethanol derivatives	C04AA31	Bamethan	2292
C - Cardiovascular system	C04 - Peripheral vasodilators	C04A - Peripheral vasodilators	C04AB - Imidazoline derivatives	C04AB01	Phentolamine	5775
C - Cardiovascular system	C04 - Peripheral vasodilators	C04A - Peripheral vasodilators	C05AB - Imidazoline derivatives	C04AB02	Tolazoline	5504
C - Cardiovascular system	C04 - Peripheral vasodilators	C04A - Peripheral vasodilators	C04AC - Nicotinic acid and derivatives	C04AC01	Nicotinic acid	938
C - Cardiovascular system	C04 - Peripheral vasodilators	C04A - Peripheral vasodilators	C05AC - Nicotinic acid and derivatives	C04AC02	Nicotinyl alcohol (pyridylcarbinol)	7510
C - Cardiovascular system	C04 - Peripheral vasodilators	C04A - Peripheral vasodilators	C06AC - Nicotinic acid and derivatives	C04AC03	Inositol nicotinate	3720
C - Cardiovascular system	C04 - Peripheral vasodilators	C04A - Peripheral vasodilators	C07AC - Nicotinic acid and derivatives	C04AC07	Ciclonicate	10444661
C - Cardiovascular system	C04 - Peripheral vasodilators	C04A - Peripheral vasodilators	C04AD - Purine derivatives	C04AD01	Pentifylline	70569
C - Cardiovascular system	C04 - Peripheral vasodilators	C04A - Peripheral vasodilators	C04AD - Purine derivatives	C04AD02	Xantinol nicotinate	9912
C - Cardiovascular system	C04 - Peripheral vasodilators	C04A - Peripheral vasodilators	C04AD - Purine derivatives	C04AD03	Pentoxifylline	4740
C - Cardiovascular system	C04 - Peripheral vasodilators	C04A - Peripheral vasodilators	C04AD - Purine derivatives	C04AD04	Etofylline nicotinate	83435
C - Cardiovascular system	C04 - Peripheral vasodilators	C04A - Peripheral vasodilators	C04AE - Ergot alkaloids	C04AE01	Ergoloid mesylates	592735
C - Cardiovascular system	C04 - Peripheral vasodilators	C04A - Peripheral vasodilators	C04AE - Ergot alkaloids	C04AE02	Nicergoline	34040
C - Cardiovascular system	C04 - Peripheral vasodilators	C04A - Peripheral vasodilators	C04AE - Ergot alkaloids	C04AE04	Dihydroergocristine	107715
C - Cardiovascular system	C04 - Peripheral vasodilators	C04A - Peripheral vasodilators	C04AE - Ergot alkaloids	C04AE51	Ergoloid mesylates, combinations	-1
C - Cardiovascular system	C04 - Peripheral vasodilators	C04A - Peripheral vasodilators	C04AE - Ergot alkaloids	C04AE54	Dihydroergocristine, combinations	-1
C - Cardiovascular system	C04 - Peripheral vasodilators	C04A - Peripheral vasodilators	C04AF - Enzymes	C04AF01	Kallidinogenase	-1
C - Cardiovascular system	C04 - Peripheral vasodilators	C04A - Peripheral vasodilators	C04AX - Other peripheral vasodilators	C04AX01	Cyclandelate	2893
C - Cardiovascular system	C04 - Peripheral vasodilators	C04A - Peripheral vasodilators	C04AX - Other peripheral vasodilators	C04AX02	Phenoxybenzamine	4768
C - Cardiovascular system	C04 - Peripheral vasodilators	C04A - Peripheral vasodilators	C04AX - Other peripheral vasodilators	C04AX07	Vincamine	15376
C - Cardiovascular system	C04 - Peripheral vasodilators	C04A - Peripheral vasodilators	C04AX - Other peripheral vasodilators	C04AX10	Moxisylyte	4260
C - Cardiovascular system	C04 - Peripheral vasodilators	C04A - Peripheral vasodilators	C04AX - Other peripheral vasodilators	C04AX11	Bencyclane	2312
C - Cardiovascular system	C04 - Peripheral vasodilators	C04A - Peripheral vasodilators	C04AX - Other peripheral vasodilators	C04AX17	Vinburnine	71203
C - Cardiovascular system	C04 - Peripheral vasodilators	C04A - Peripheral vasodilators	C04AX - Other peripheral vasodilators	C04AX19	Suloctidil	657255
C - Cardiovascular system	C04 - Peripheral vasodilators	C04A - Peripheral vasodilators	C04AX - Other peripheral vasodilators	C04AX20	Buflomedil	2467
C - Cardiovascular system	C04 - Peripheral vasodilators	C04A - Peripheral vasodilators	C04AX - Other peripheral vasodilators	C04AX21	Naftidrofuryl	4417
C - Cardiovascular system	C04 - Peripheral vasodilators	C04A - Peripheral vasodilators	C04AX - Other peripheral vasodilators	C04AX23	Butalamine	30949
C - Cardiovascular system	C04 - Peripheral vasodilators	C04A - Peripheral vasodilators	C04AX - Other peripheral vasodilators	C04AX24	Visnadine	442151
C - Cardiovascular system	C04 - Peripheral vasodilators	C04A - Peripheral vasodilators	C04AX - Other peripheral vasodilators	C04AX26	Cetiedil	66384
C - Cardiovascular system	C04 - Peripheral vasodilators	C04A - Peripheral vasodilators	C04AX - Other peripheral vasodilators	C04AX27	Cinepazide	5282459
C - Cardiovascular system	C04 - Peripheral vasodilators	C04A - Peripheral vasodilators	C04AX - Other peripheral vasodilators	C04AX28	Ifenprodil	3689
C - Cardiovascular system	C04 - Peripheral vasodilators	C04A - Peripheral vasodilators	C04AX - Other peripheral vasodilators	C04AX30	Azapetine	8966
C - Cardiovascular system	C04 - Peripheral vasodilators	C04A - Peripheral vasodilators	C04AX - Other peripheral vasodilators	C04AX32	Fasudil	3547
C - Cardiovascular system	C04 - Peripheral vasodilators	C04A - Peripheral vasodilators	C04AX - Other peripheral vasodilators	C04AX33	Clazosentan	6433095
C - Cardiovascular system	C05 - Vasoprotectives	C05A - Agents for treatment of hemorrhoids and anal fissures for topical use	C05AA - Corticosteroids	C05AA01	Hydrocortisone	5754
C - Cardiovascular system	C05 - Vasoprotectives	C05A - Agents for treatment of hemorrhoids and anal fissures for topical use	C05AA - Corticosteroids	C05AA04	Prednisolone	5755
C - Cardiovascular system	C05 - Vasoprotectives	C05A - Agents for treatment of hemorrhoids and anal fissures for topical use	C05AA - Corticosteroids	C05AA05	Betamethasone	9782
C - Cardiovascular system	C05 - Vasoprotectives	C05A - Agents for treatment of hemorrhoids and anal fissures for topical use	C05AA - Corticosteroids	C05AA06	Fluorometholone	9878
C - Cardiovascular system	C05 - Vasoprotectives	C05A - Agents for treatment of hemorrhoids and anal fissures for topical use	C05AA - Corticosteroids	C05AA08	Fluocortolone	9053
C - Cardiovascular system	C05 - Vasoprotectives	C05A - Agents for treatment of hemorrhoids and anal fissures for topical use	C05AA - Corticosteroids	C05AA09	Dexamethasone	5743
C - Cardiovascular system	C05 - Vasoprotectives	C05A - Agents for treatment of hemorrhoids and anal fissures for topical use	C05AA - Corticosteroids	C05AA10	Fluocinolone acetonide	6215
C - Cardiovascular system	C05 - Vasoprotectives	C05A - Agents for treatment of hemorrhoids and anal fissures for topical use	C05AA - Corticosteroids	C05AA11	Fluocinonide	9642
C - Cardiovascular system	C05 - Vasoprotectives	C05A - Agents for treatment of hemorrhoids and anal fissures for topical use	C05AA - Corticosteroids	C05AA12	Triamcinolone	31307
C - Cardiovascular system	C05 - Vasoprotectives	C05A - Agents for treatment of hemorrhoids and anal fissures for topical use	C05AD - Local anesthetics	C05AD01	Lidocaine	3676
C - Cardiovascular system	C05 - Vasoprotectives	C05A - Agents for treatment of hemorrhoids and anal fissures for topical use	C05AD - Local anesthetics	C05AD02	Tetracaine	5411
C - Cardiovascular system	C05 - Vasoprotectives	C05A - Agents for treatment of hemorrhoids and anal fissures for topical use	C05AD - Local anesthetics	C05AD03	Benzocaine	2337
C - Cardiovascular system	C05 - Vasoprotectives	C05A - Agents for treatment of hemorrhoids and anal fissures for topical use	C05AD - Local anesthetics	C05AD04	Cinchocaine	3025
C - Cardiovascular system	C05 - Vasoprotectives	C05A - Agents for treatment of hemorrhoids and anal fissures for topical use	C05AD - Local anesthetics	C05AD05	Procaine	4914
C - Cardiovascular system	C05 - Vasoprotectives	C05A - Agents for treatment of hemorrhoids and anal fissures for topical use	C05AD - Local anesthetics	C05AD06	Oxetacaine	4621
C - Cardiovascular system	C05 - Vasoprotectives	C05A - Agents for treatment of hemorrhoids and anal fissures for topical use	C05AD - Local anesthetics	C05AD07	Pramocaine	4886
C - Cardiovascular system	C05 - Vasoprotectives	C05A - Agents for treatment of hemorrhoids and anal fissures for topical use	C05AE - Muscle relaxants	C05AE01	Glyceryl trinitrate	4510
C - Cardiovascular system	C05 - Vasoprotectives	C05A - Agents for treatment of hemorrhoids and anal fissures for topical use	C05AE - Muscle relaxants	C05AE02	Isosorbide dinitrate	6883
C - Cardiovascular system	C05 - Vasoprotectives	C05A - Agents for treatment of hemorrhoids and anal fissures for topical use	C05AE - Muscle relaxants	C05AE03	Diltiazem	39186
C - Cardiovascular system	C05 - Vasoprotectives	C05A - Agents for treatment of hemorrhoids and anal fissures for topical use	C05AX - Other agents for treatment of hemorrhoids and anal fissures for topical use	C05AX01	Aluminium preparations	-1
C - Cardiovascular system	C05 - Vasoprotectives	C05A - Agents for treatment of hemorrhoids and anal fissures for topical use	C05AX - Other agents for treatment of hemorrhoids and anal fissures for topical use	C05AX02	Bismuth preparations, combinations	-1
C - Cardiovascular system	C05 - Vasoprotectives	C05A - Agents for treatment of hemorrhoids and anal fissures for topical use	C05AX - Other agents for treatment of hemorrhoids and anal fissures for topical use	C05AX03	Other preparations, combinations	-1
C - Cardiovascular system	C05 - Vasoprotectives	C05A - Agents for treatment of hemorrhoids and anal fissures for topical use	C05AX - Other agents for treatment of hemorrhoids and anal fissures for topical use	C05AX04	Zinc preparations	-1
C - Cardiovascular system	C05 - Vasoprotectives	C05A - Agents for treatment of hemorrhoids and anal fissures for topical use	C05AX - Other agents for treatment of hemorrhoids and anal fissures for topical use	C05AX05	Tribenoside	196122
C - Cardiovascular system	C05 - Vasoprotectives	C05A - Agents for treatment of hemorrhoids and anal fissures for topical use	C05AX - Other agents for treatment of hemorrhoids and anal fissures for topical use	C05AX06	Phenylephrine	6041
C - Cardiovascular system	C05 - Vasoprotectives	C05B - Antivaricose therapy	C05BA - Heparins or heparinoids for topical use	C05BA01	Organo-heparinoid	-1
C - Cardiovascular system	C05 - Vasoprotectives	C05B - Antivaricose therapy	C05BA - Heparins or heparinoids for topical use	C05BA02	Sodium apolate	3270262
C - Cardiovascular system	C05 - Vasoprotectives	C05B - Antivaricose therapy	C05BA - Heparins or heparinoids for topical use	C05BA03	Heparin	-1
C - Cardiovascular system	C05 - Vasoprotectives	C05B - Antivaricose therapy	C05BA - Heparins or heparinoids for topical use	C05BA04	Pentosan polysulfate sodium	-1
C - Cardiovascular system	C05 - Vasoprotectives	C05B - Antivaricose therapy	C05BA - Heparins or heparinoids for topical use	C05BA51	Heparinoid, combinations	-1
C - Cardiovascular system	C05 - Vasoprotectives	C05B - Antivaricose therapy	C05BA - Heparins or heparinoids for topical use	C05BA53	Heparin, combinations	-1
C - Cardiovascular system	C05 - Vasoprotectives	C05B - Antivaricose therapy	C05BB - Sclerosing agents for local injection	C05BB01	Monoethanolamine oleate	5282489
C - Cardiovascular system	C05 - Vasoprotectives	C05B - Antivaricose therapy	C05BB - Sclerosing agents for local injection	C05BB02	Polidocanol	656641
C - Cardiovascular system	C05 - Vasoprotectives	C05B - Antivaricose therapy	C05BB - Sclerosing agents for local injection	C05BB03	Invert sugar	21924868
C - Cardiovascular system	C05 - Vasoprotectives	C05B - Antivaricose therapy	C05BB - Sclerosing agents for local injection	C05BB04	Sodium tetradecyl sulfate	23665770
C - Cardiovascular system	C05 - Vasoprotectives	C05B - Antivaricose therapy	C05BB - Sclerosing agents for local injection	C05BB05	Phenol	996
C - Cardiovascular system	C05 - Vasoprotectives	C05B - Antivaricose therapy	C05BB - Sclerosing agents for local injection	C05BB56	Glucose, combinations	-1
C - Cardiovascular system	C05 - Vasoprotectives	C05B - Antivaricose therapy	C05BX - Other sclerosing agents	C05BX01	Calcium dobesilate	29963
C - Cardiovascular system	C05 - Vasoprotectives	C05B - Antivaricose therapy	C05BX - Other sclerosing agents	C05BX51	Calcium dobesilate, combinations	-1
C - Cardiovascular system	C05 - Vasoprotectives	C05C - Capillary stabilizing agents	C05CA - Bioflavonoids	C05CA01	Rutoside	5280805
C - Cardiovascular system	C05 - Vasoprotectives	C05C - Capillary stabilizing agents	C05CA - Bioflavonoids	C05CA02	Monoxerutin	9852585
C - Cardiovascular system	C05 - Vasoprotectives	C05C - Capillary stabilizing agents	C05CA - Bioflavonoids	C05CA03	Diosmin	5281613
C - Cardiovascular system	C05 - Vasoprotectives	C05C - Capillary stabilizing agents	C05CA - Bioflavonoids	C05CA04	Troxerutin	5486699
C - Cardiovascular system	C05 - Vasoprotectives	C05C - Capillary stabilizing agents	C05CA - Bioflavonoids	C05CA05	Hidrosmin	3087722
C - Cardiovascular system	C05 - Vasoprotectives	C05C - Capillary stabilizing agents	C05CA - Bioflavonoids	C05CA51	Rutoside, combinations	-1
C - Cardiovascular system	C05 - Vasoprotectives	C05C - Capillary stabilizing agents	C05CA - Bioflavonoids	C05CA53	Diosmin, combinations	-1
C - Cardiovascular system	C05 - Vasoprotectives	C05C - Capillary stabilizing agents	C05CA - Bioflavonoids	C05CA54	Troxerutin, combinations	-1
C - Cardiovascular system	C05 - Vasoprotectives	C05C - Capillary stabilizing agents	C05CX - Other capillary stabilizing agents	C05CX01	Tribenoside	196122
C - Cardiovascular system	C05 - Vasoprotectives	C05C - Capillary stabilizing agents	C05CX - Other capillary stabilizing agents	C05CX02	Naftazone	71688
C - Cardiovascular system	C05 - Vasoprotectives	C05C - Capillary stabilizing agents	C05CX - Other capillary stabilizing agents	C05CX03	Hippocastani semen	-1
C - Cardiovascular system	C05 - Vasoprotectives	C05X - Other vasoprotectives	C05XX - Other vasoprotectives	C05XX01	Beperminogene perplasmid	-1
C - Cardiovascular system	C07 - Beta blocking agents	C07A - Beta blocking agents	C07AA - Beta blocking agents, non-selective	C07AA01	Alprenolol	2119
C - Cardiovascular system	C07 - Beta blocking agents	C07A - Beta blocking agents	C07AA - Beta blocking agents, non-selective	C07AA02	Oxprenolol	4631
C - Cardiovascular system	C07 - Beta blocking agents	C07A - Beta blocking agents	C07AA - Beta blocking agents, non-selective	C07AA03	Pindolol	4828
C - Cardiovascular system	C07 - Beta blocking agents	C07A - Beta blocking agents	C07AA - Beta blocking agents, non-selective	C07AA05	Propranolol	4946
C - Cardiovascular system	C07 - Beta blocking agents	C07A - Beta blocking agents	C07AA - Beta blocking agents, non-selective	C07AA06	Timolol	33624
C - Cardiovascular system	C07 - Beta blocking agents	C07A - Beta blocking agents	C07AA - Beta blocking agents, non-selective	C07AA07	Sotalol	5253
C - Cardiovascular system	C07 - Beta blocking agents	C07A - Beta blocking agents	C07AA - Beta blocking agents, non-selective	C07AA12	Nadolol	39147
C - Cardiovascular system	C07 - Beta blocking agents	C07A - Beta blocking agents	C07AA - Beta blocking agents, non-selective	C07AA14	Mepindolol	71698
C - Cardiovascular system	C07 - Beta blocking agents	C07A - Beta blocking agents	C07AA - Beta blocking agents, non-selective	C07AA15	Carteolol	2583
C - Cardiovascular system	C07 - Beta blocking agents	C07A - Beta blocking agents	C07AA - Beta blocking agents, non-selective	C07AA16	Tertatolol	36920
C - Cardiovascular system	C07 - Beta blocking agents	C07A - Beta blocking agents	C07AA - Beta blocking agents, non-selective	C07AA17	Bopindolol	44112
C - Cardiovascular system	C07 - Beta blocking agents	C07A - Beta blocking agents	C07AA - Beta blocking agents, non-selective	C07AA19	Bupranolol	2475
C - Cardiovascular system	C07 - Beta blocking agents	C07A - Beta blocking agents	C07AA - Beta blocking agents, non-selective	C07AA23	Penbutolol	37464
C - Cardiovascular system	C07 - Beta blocking agents	C07A - Beta blocking agents	C07AA - Beta blocking agents, non-selective	C07AA27	Cloranolol	65814
C - Cardiovascular system	C07 - Beta blocking agents	C07A - Beta blocking agents	C07AB - Beta blocking agents, selective	C07AB01	Practolol	4883
C - Cardiovascular system	C07 - Beta blocking agents	C07A - Beta blocking agents	C07AB - Beta blocking agents, selective	C07AB02	Metoprolol	4171
C - Cardiovascular system	C07 - Beta blocking agents	C07A - Beta blocking agents	C07AB - Beta blocking agents, selective	C07AB03	Atenolol	2249
C - Cardiovascular system	C07 - Beta blocking agents	C07A - Beta blocking agents	C07AB - Beta blocking agents, selective	C07AB04	Acebutolol	1978
C - Cardiovascular system	C07 - Beta blocking agents	C07A - Beta blocking agents	C07AB - Beta blocking agents, selective	C07AB05	Betaxolol	2369
C - Cardiovascular system	C07 - Beta blocking agents	C07A - Beta blocking agents	C07AB - Beta blocking agents, selective	C07AB06	Bevantolol	2372
C - Cardiovascular system	C07 - Beta blocking agents	C07A - Beta blocking agents	C07AB - Beta blocking agents, selective	C07AB07	Bisoprolol	2405
C - Cardiovascular system	C07 - Beta blocking agents	C07A - Beta blocking agents	C07AB - Beta blocking agents, selective	C07AB08	Celiprolol	2663
C - Cardiovascular system	C07 - Beta blocking agents	C07A - Beta blocking agents	C07AB - Beta blocking agents, selective	C07AB09	Esmolol	59768
C - Cardiovascular system	C07 - Beta blocking agents	C07A - Beta blocking agents	C07AB - Beta blocking agents, selective	C07AB10	Epanolol	72014
C - Cardiovascular system	C07 - Beta blocking agents	C07A - Beta blocking agents	C07AB - Beta blocking agents, selective	C07AB11	S-atenolol	175540
C - Cardiovascular system	C07 - Beta blocking agents	C07A - Beta blocking agents	C07AB - Beta blocking agents, selective	C07AB12	Nebivolol	71301
C - Cardiovascular system	C07 - Beta blocking agents	C07A - Beta blocking agents	C07AB - Beta blocking agents, selective	C07AB13	Talinolol	68770
C - Cardiovascular system	C07 - Beta blocking agents	C07A - Beta blocking agents	C07AB - Beta blocking agents, selective	C07AB14	Landiolol	114905
C - Cardiovascular system	C07 - Beta blocking agents	C07A - Beta blocking agents	C07AG - Alpha and beta blocking agents	C07AG01	Labetalol	3869
C - Cardiovascular system	C07 - Beta blocking agents	C07A - Beta blocking agents	C07AG - Alpha and beta blocking agents	C07AG02	Carvedilol	2585
C - Cardiovascular system	C07 - Beta blocking agents	C07B - Beta blocking agents and thiazides	C07BA - Beta blocking agents, non-selective, and thiazides	C07BA02	Oxprenolol and thiazides	-1
C - Cardiovascular system	C07 - Beta blocking agents	C07B - Beta blocking agents and thiazides	C07BA - Beta blocking agents, non-selective, and thiazides	C07BA05	Propranolol and thiazides	-1
C - Cardiovascular system	C07 - Beta blocking agents	C07B - Beta blocking agents and thiazides	C07BA - Beta blocking agents, non-selective, and thiazides	C07BA06	Timolol and thiazides	-1
C - Cardiovascular system	C07 - Beta blocking agents	C07B - Beta blocking agents and thiazides	C07BA - Beta blocking agents, non-selective, and thiazides	C07BA07	Sotalol and thiazides	-1
C - Cardiovascular system	C07 - Beta blocking agents	C07B - Beta blocking agents and thiazides	C07BA - Beta blocking agents, non-selective, and thiazides	C07BA12	Nadolol and thiazides	-1
C - Cardiovascular system	C07 - Beta blocking agents	C07B - Beta blocking agents and thiazides	C07BA - Beta blocking agents, non-selective, and thiazides	C07BA68	Metipranolol and thiazides, combinations	-1
C - Cardiovascular system	C07 - Beta blocking agents	C07B - Beta blocking agents and thiazides	C07BB - Beta blocking agents, selective, and thiazides	C07BB02	Metoprolol and thiazides	-1
C - Cardiovascular system	C07 - Beta blocking agents	C07B - Beta blocking agents and thiazides	C07BB - Beta blocking agents, selective, and thiazides	C07BB03	Atenolol and thiazides	-1
C - Cardiovascular system	C07 - Beta blocking agents	C07B - Beta blocking agents and thiazides	C07BB - Beta blocking agents, selective, and thiazides	C07BB04	Acebutolol and thiazides	-1
C - Cardiovascular system	C07 - Beta blocking agents	C07B - Beta blocking agents and thiazides	C07BB - Beta blocking agents, selective, and thiazides	C07BB06	Bevantolol and thiazides	-1
C - Cardiovascular system	C07 - Beta blocking agents	C07B - Beta blocking agents and thiazides	C07BB - Beta blocking agents, selective, and thiazides	C07BB07	Bisoprolol and thiazides	-1
C - Cardiovascular system	C07 - Beta blocking agents	C07B - Beta blocking agents and thiazides	C07BB - Beta blocking agents, selective, and thiazides	C07BB12	Nebivolol and thiazides	-1
C - Cardiovascular system	C07 - Beta blocking agents	C07B - Beta blocking agents and thiazides	C07BB - Beta blocking agents, selective, and thiazides	C07BB52	Metoprolol and thiazides, combinations	-1
C - Cardiovascular system	C07 - Beta blocking agents	C07B - Beta blocking agents and thiazides	C07BG - Alpha and beta blocking agents and thiazides	C07BG01	Labetalol and thiazides	-1
C - Cardiovascular system	C07 - Beta blocking agents	C07C - Beta blocking agents and other diuretics	C07CA - Beta blocking agents, non-selective, and other diuretics	C07CA02	Oxprenolol and other diuretics	-1
C - Cardiovascular system	C07 - Beta blocking agents	C07C - Beta blocking agents and other diuretics	C07CA - Beta blocking agents, non-selective, and other diuretics	C07CA03	Pindolol and other diuretics	-1
C - Cardiovascular system	C07 - Beta blocking agents	C07C - Beta blocking agents and other diuretics	C07CA - Beta blocking agents, non-selective, and other diuretics	C07CA17	Bopindolol and other diuretics	-1
C - Cardiovascular system	C07 - Beta blocking agents	C07C - Beta blocking agents and other diuretics	C07CA - Beta blocking agents, non-selective, and other diuretics	C07CA23	Penbutolol and other diuretics	-1
C - Cardiovascular system	C07 - Beta blocking agents	C07C - Beta blocking agents and other diuretics	C07CB - Beta blocking agents, selective, and other diuretics	C07CB02	Metoprolol and other diuretics	-1
C - Cardiovascular system	C07 - Beta blocking agents	C07C - Beta blocking agents and other diuretics	C07CB - Beta blocking agents, selective, and other diuretics	C07CB03	Atenolol and other diuretics	-1
C - Cardiovascular system	C07 - Beta blocking agents	C07C - Beta blocking agents and other diuretics	C07CB - Beta blocking agents, selective, and other diuretics	C07CB53	Atenolol and other diuretics, combinations	-1
C - Cardiovascular system	C07 - Beta blocking agents	C07C - Beta blocking agents and other diuretics	C07CG - Alpha and beta blocking agents and other diuretics	C07CG01	Labetalol and other diuretics	-1
C - Cardiovascular system	C07 - Beta blocking agents	C07D - Beta blocking agents, thiazides and other diuretics	C07DA - Beta blocking agents, non-selective, thiazides and other diuretics	C07DA06	Timolol, thiazides and other diuretics	-1
C - Cardiovascular system	C07 - Beta blocking agents	C07D - Beta blocking agents, thiazides and other diuretics	C07DB - Beta blocking agents, selective, thiazides and other diuretics	C07DB01	Atenolol, thiazides and other diuretics	-1
C - Cardiovascular system	C07 - Beta blocking agents	C07F - Beta blocking agents, other combinations	C07FB - Beta blocking agents and calcium channel blockers	C07FB02	Metoprolol and felodipine	-1
C - Cardiovascular system	C07 - Beta blocking agents	C07F - Beta blocking agents, other combinations	C07FB - Beta blocking agents and calcium channel blockers	C07FB03	Atenolol and nifedipine	-1
C - Cardiovascular system	C07 - Beta blocking agents	C07F - Beta blocking agents, other combinations	C07FB - Beta blocking agents and calcium channel blockers	C07FB07	Bisoprolol and amlodipine	-1
C - Cardiovascular system	C07 - Beta blocking agents	C07F - Beta blocking agents, other combinations	C07FB - Beta blocking agents and calcium channel blockers	C07FB12	Nebivolol and amlodipine	-1
C - Cardiovascular system	C07 - Beta blocking agents	C07F - Beta blocking agents, other combinations	C07FB - Beta blocking agents and calcium channel blockers	C07FB13	Metoprolol and amlodipine	-1
C - Cardiovascular system	C07 - Beta blocking agents	C07F - Beta blocking agents, other combinations	C07FX - Beta blocking agents, other combinations	C07FX01	Propranolol and other combinations	-1
C - Cardiovascular system	C07 - Beta blocking agents	C07F - Beta blocking agents, other combinations	C07FX - Beta blocking agents, other combinations	C07FX02	Sotalol and acetylsalicylic acid	-1
C - Cardiovascular system	C07 - Beta blocking agents	C07F - Beta blocking agents, other combinations	C07FX - Beta blocking agents, other combinations	C07FX03	Metoprolol and acetylsalicylic acid	-1
C - Cardiovascular system	C07 - Beta blocking agents	C07F - Beta blocking agents, other combinations	C07FX - Beta blocking agents, other combinations	C07FX04	Bisoprolol and acetylsalicylic acid	-1
C - Cardiovascular system	C07 - Beta blocking agents	C07F - Beta blocking agents, other combinations	C07FX - Beta blocking agents, other combinations	C07FX05	Metoprolol and ivabradine	-1
C - Cardiovascular system	C07 - Beta blocking agents	C07F - Beta blocking agents, other combinations	C07FX - Beta blocking agents, other combinations	C07FX06	Carvedilol and ivabradine	-1
C - Cardiovascular system	C08 - Calcium channel blockers	C08C - Selective calcium channel blockers with mainly vascular effects	C08CA - Dihydropyridine derivatives	C08CA01	Amlodipine	2162
C - Cardiovascular system	C08 - Calcium channel blockers	C08C - Selective calcium channel blockers with mainly vascular effects	C08CA - Dihydropyridine derivatives	C08CA02	Felodipine	3333
C - Cardiovascular system	C08 - Calcium channel blockers	C08C - Selective calcium channel blockers with mainly vascular effects	C08CA - Dihydropyridine derivatives	C08CA03	Isradipine	3784
C - Cardiovascular system	C08 - Calcium channel blockers	C08C - Selective calcium channel blockers with mainly vascular effects	C08CA - Dihydropyridine derivatives	C08CA04	Nicardipine	4474
C - Cardiovascular system	C08 - Calcium channel blockers	C08C - Selective calcium channel blockers with mainly vascular effects	C08CA - Dihydropyridine derivatives	C08CA05	Nifedipine	4485
C - Cardiovascular system	C08 - Calcium channel blockers	C08C - Selective calcium channel blockers with mainly vascular effects	C08CA - Dihydropyridine derivatives	C08CA06	Nimodipine	4497
C - Cardiovascular system	C08 - Calcium channel blockers	C08C - Selective calcium channel blockers with mainly vascular effects	C08CA - Dihydropyridine derivatives	C08CA07	Nisoldipine	4499
C - Cardiovascular system	C08 - Calcium channel blockers	C08C - Selective calcium channel blockers with mainly vascular effects	C08CA - Dihydropyridine derivatives	C08CA08	Nitrendipine	4507
C - Cardiovascular system	C08 - Calcium channel blockers	C08C - Selective calcium channel blockers with mainly vascular effects	C08CA - Dihydropyridine derivatives	C08CA09	Lacidipine	5311217
C - Cardiovascular system	C08 - Calcium channel blockers	C08C - Selective calcium channel blockers with mainly vascular effects	C08CA - Dihydropyridine derivatives	C08CA10	Nilvadipine	4494
C - Cardiovascular system	C08 - Calcium channel blockers	C08C - Selective calcium channel blockers with mainly vascular effects	C08CA - Dihydropyridine derivatives	C08CA11	Manidipine	4008
C - Cardiovascular system	C08 - Calcium channel blockers	C08C - Selective calcium channel blockers with mainly vascular effects	C08CA - Dihydropyridine derivatives	C08CA12	Barnidipine	443869
C - Cardiovascular system	C08 - Calcium channel blockers	C08C - Selective calcium channel blockers with mainly vascular effects	C08CA - Dihydropyridine derivatives	C08CA13	Lercanidipine	65866
C - Cardiovascular system	C08 - Calcium channel blockers	C08C - Selective calcium channel blockers with mainly vascular effects	C08CA - Dihydropyridine derivatives	C08CA14	Cilnidipine	5282138
C - Cardiovascular system	C08 - Calcium channel blockers	C08C - Selective calcium channel blockers with mainly vascular effects	C08CA - Dihydropyridine derivatives	C08CA15	Benidipine	656668
C - Cardiovascular system	C08 - Calcium channel blockers	C08C - Selective calcium channel blockers with mainly vascular effects	C08CA - Dihydropyridine derivatives	C08CA16	Clevidipine	153994
C - Cardiovascular system	C08 - Calcium channel blockers	C08C - Selective calcium channel blockers with mainly vascular effects	C08CA - Dihydropyridine derivatives	C08CA17	Levamlodipine	9822750
C - Cardiovascular system	C08 - Calcium channel blockers	C08C - Selective calcium channel blockers with mainly vascular effects	C08CA - Dihydropyridine derivatives	C08CA51	Amlodipine and celecoxib	-1
C - Cardiovascular system	C08 - Calcium channel blockers	C08C - Selective calcium channel blockers with mainly vascular effects	C08CA - Dihydropyridine derivatives	C08CA55	Nifedipine, combinations	-1
C - Cardiovascular system	C08 - Calcium channel blockers	C08C - Selective calcium channel blockers with mainly vascular effects	C08CX - Other selective calcium channel blockers with mainly vascular effects	C08CX01	Mibefradil	60663
C - Cardiovascular system	C08 - Calcium channel blockers	C08D - Selective calcium channel blockers with direct cardiac effects	C08DA - Phenylalkylamine derivatives	C08DA01	Verapamil	2520
C - Cardiovascular system	C08 - Calcium channel blockers	C08D - Selective calcium channel blockers with direct cardiac effects	C08DA - Phenylalkylamine derivatives	C08DA02	Gallopamil	1234
C - Cardiovascular system	C08 - Calcium channel blockers	C08D - Selective calcium channel blockers with direct cardiac effects	C08DA - Phenylalkylamine derivatives	C08DA51	Verapamil, combinations	-1
C - Cardiovascular system	C08 - Calcium channel blockers	C08D - Selective calcium channel blockers with direct cardiac effects	C08DB - Benzothiazepine derivatives	C08DB01	Diltiazem	39186
C - Cardiovascular system	C08 - Calcium channel blockers	C08E - Non-selective calcium channel blockers	C08EA - Phenylalkylamine derivatives	C08EA01	Fendiline	3336
C - Cardiovascular system	C08 - Calcium channel blockers	C08E - Non-selective calcium channel blockers	C08EA - Phenylalkylamine derivatives	C08EA02	Bepridil	2351
C - Cardiovascular system	C08 - Calcium channel blockers	C08E - Non-selective calcium channel blockers	C08EX - Other non-selective calcium channel blockers	C08EX01	Lidoflazine	3926
C - Cardiovascular system	C08 - Calcium channel blockers	C08E - Non-selective calcium channel blockers	C08EX - Other non-selective calcium channel blockers	C08EX02	Perhexiline	4746
C - Cardiovascular system	C08 - Calcium channel blockers	C08G - Calcium channel blockers and diuretics	C08GA - Calcium channel blockers and diuretics	C08GA01	Nifedipine and diuretics	-1
C - Cardiovascular system	C08 - Calcium channel blockers	C08G - Calcium channel blockers and diuretics	C08GA - Calcium channel blockers and diuretics	C08GA02	Amlodipine and diuretics	-1
C - Cardiovascular system	C09 - Agents acting on the renin-angiotensin system	C09A - Ace inhibitors, plain	C09AA - Ace inhibitors, plain	C09AA01	Captopril	44093
C - Cardiovascular system	C09 - Agents acting on the renin-angiotensin system	C09A - Ace inhibitors, plain	C09AA - Ace inhibitors, plain	C09AA02	Enalapril	5388962
C - Cardiovascular system	C09 - Agents acting on the renin-angiotensin system	C09A - Ace inhibitors, plain	C09AA - Ace inhibitors, plain	C09AA03	Lisinopril	5362119
C - Cardiovascular system	C09 - Agents acting on the renin-angiotensin system	C09A - Ace inhibitors, plain	C09AA - Ace inhibitors, plain	C09AA04	Perindopril	107807
C - Cardiovascular system	C09 - Agents acting on the renin-angiotensin system	C09A - Ace inhibitors, plain	C09AA - Ace inhibitors, plain	C09AA05	Ramipril	5362129
C - Cardiovascular system	C09 - Agents acting on the renin-angiotensin system	C09A - Ace inhibitors, plain	C09AA - Ace inhibitors, plain	C09AA06	Quinapril	54892
C - Cardiovascular system	C09 - Agents acting on the renin-angiotensin system	C09A - Ace inhibitors, plain	C09AA - Ace inhibitors, plain	C09AA07	Benazepril	5362124
C - Cardiovascular system	C09 - Agents acting on the renin-angiotensin system	C09A - Ace inhibitors, plain	C09AA - Ace inhibitors, plain	C09AA08	Cilazapril	56330
C - Cardiovascular system	C09 - Agents acting on the renin-angiotensin system	C09A - Ace inhibitors, plain	C09AA - Ace inhibitors, plain	C09AA09	Fosinopril	55891
C - Cardiovascular system	C09 - Agents acting on the renin-angiotensin system	C09A - Ace inhibitors, plain	C09AA - Ace inhibitors, plain	C09AA10	Trandolapril	5484727
C - Cardiovascular system	C09 - Agents acting on the renin-angiotensin system	C09A - Ace inhibitors, plain	C09AA - Ace inhibitors, plain	C09AA11	Spirapril	5311447
C - Cardiovascular system	C09 - Agents acting on the renin-angiotensin system	C09A - Ace inhibitors, plain	C09AA - Ace inhibitors, plain	C09AA12	Delapril	5362116
C - Cardiovascular system	C09 - Agents acting on the renin-angiotensin system	C09A - Ace inhibitors, plain	C09AA - Ace inhibitors, plain	C09AA13	Moexipril	91270
C - Cardiovascular system	C09 - Agents acting on the renin-angiotensin system	C09A - Ace inhibitors, plain	C09AA - Ace inhibitors, plain	C09AA14	Temocapril	443874
C - Cardiovascular system	C09 - Agents acting on the renin-angiotensin system	C09A - Ace inhibitors, plain	C09AA - Ace inhibitors, plain	C09AA15	Zofenopril	92400
C - Cardiovascular system	C09 - Agents acting on the renin-angiotensin system	C09A - Ace inhibitors, plain	C09AA - Ace inhibitors, plain	C09AA16	Imidapril	5464343
C - Cardiovascular system	C09 - Agents acting on the renin-angiotensin system	C09B - Ace inhibitors, combinations	C09BA - Ace inhibitors and diuretics	C09BA01	Captopril and diuretics	-1
C - Cardiovascular system	C09 - Agents acting on the renin-angiotensin system	C09B - Ace inhibitors, combinations	C09BA - Ace inhibitors and diuretics	C09BA02	Enalapril and diuretics	-1
C - Cardiovascular system	C09 - Agents acting on the renin-angiotensin system	C09B - Ace inhibitors, combinations	C09BA - Ace inhibitors and diuretics	C09BA03	Lisinopril and diuretics	-1
C - Cardiovascular system	C09 - Agents acting on the renin-angiotensin system	C09B - Ace inhibitors, combinations	C09BA - Ace inhibitors and diuretics	C09BA04	Perindopril and diuretics	-1
C - Cardiovascular system	C09 - Agents acting on the renin-angiotensin system	C09B - Ace inhibitors, combinations	C09BA - Ace inhibitors and diuretics	C09BA05	Ramipril and diuretics	-1
C - Cardiovascular system	C09 - Agents acting on the renin-angiotensin system	C09B - Ace inhibitors, combinations	C09BA - Ace inhibitors and diuretics	C09BA06	Quinapril and diuretics	-1
C - Cardiovascular system	C09 - Agents acting on the renin-angiotensin system	C09B - Ace inhibitors, combinations	C09BA - Ace inhibitors and diuretics	C09BA07	Benazepril and diuretics	-1
C - Cardiovascular system	C09 - Agents acting on the renin-angiotensin system	C09B - Ace inhibitors, combinations	C09BA - Ace inhibitors and diuretics	C09BA08	Cilazapril and diuretics	-1
C - Cardiovascular system	C09 - Agents acting on the renin-angiotensin system	C09B - Ace inhibitors, combinations	C09BA - Ace inhibitors and diuretics	C09BA09	Fosinopril and diuretics	-1
C - Cardiovascular system	C09 - Agents acting on the renin-angiotensin system	C09B - Ace inhibitors, combinations	C09BA - Ace inhibitors and diuretics	C09BA12	Delapril and diuretics	-1
C - Cardiovascular system	C09 - Agents acting on the renin-angiotensin system	C09B - Ace inhibitors, combinations	C09BA - Ace inhibitors and diuretics	C09BA13	Moexipril and diuretics	-1
C - Cardiovascular system	C09 - Agents acting on the renin-angiotensin system	C09B - Ace inhibitors, combinations	C09BA - Ace inhibitors and diuretics	C09BA15	Zofenopril and diuretics	-1
C - Cardiovascular system	C09 - Agents acting on the renin-angiotensin system	C09B - Ace inhibitors, combinations	C09BB - Ace inhibitors and calcium channel blockers	C09BB02	Enalapril and lercanidipine	-1
C - Cardiovascular system	C09 - Agents acting on the renin-angiotensin system	C09B - Ace inhibitors, combinations	C09BB - Ace inhibitors and calcium channel blockers	C09BB03	Lisinopril and amlodipine	-1
C - Cardiovascular system	C09 - Agents acting on the renin-angiotensin system	C09B - Ace inhibitors, combinations	C09BB - Ace inhibitors and calcium channel blockers	C09BB04	Perindopril and amlodipine	-1
C - Cardiovascular system	C09 - Agents acting on the renin-angiotensin system	C09B - Ace inhibitors, combinations	C09BB - Ace inhibitors and calcium channel blockers	C09BB05	Ramipril and felodipine	-1
C - Cardiovascular system	C09 - Agents acting on the renin-angiotensin system	C09B - Ace inhibitors, combinations	C09BB - Ace inhibitors and calcium channel blockers	C09BB06	Enalapril and nitrendipine	-1
C - Cardiovascular system	C09 - Agents acting on the renin-angiotensin system	C09B - Ace inhibitors, combinations	C09BB - Ace inhibitors and calcium channel blockers	C09BB07	Ramipril and amlodipine	-1
C - Cardiovascular system	C09 - Agents acting on the renin-angiotensin system	C09B - Ace inhibitors, combinations	C09BB - Ace inhibitors and calcium channel blockers	C09BB10	Trandolapril and verapamil	-1
C - Cardiovascular system	C09 - Agents acting on the renin-angiotensin system	C09B - Ace inhibitors, combinations	C09BB - Ace inhibitors and calcium channel blockers	C09BB12	Delapril and manidipine	-1
C - Cardiovascular system	C09 - Agents acting on the renin-angiotensin system	C09B - Ace inhibitors, combinations	C09BB - Ace inhibitors and calcium channel blockers	C09BB13	Benazepril and amlodipine	-1
C - Cardiovascular system	C09 - Agents acting on the renin-angiotensin system	C09B - Ace inhibitors, combinations	C09BX - Ace inhibitors, other combinations	C09BX01	Perindopril, amlodipine and indapamide	-1
C - Cardiovascular system	C09 - Agents acting on the renin-angiotensin system	C09B - Ace inhibitors, combinations	C09BX - Ace inhibitors, other combinations	C09BX02	Perindopril and bisoprolol	-1
C - Cardiovascular system	C09 - Agents acting on the renin-angiotensin system	C09B - Ace inhibitors, combinations	C09BX - Ace inhibitors, other combinations	C09BX03	Ramipril, amlodipine and hydrochlorothiazide	-1
C - Cardiovascular system	C09 - Agents acting on the renin-angiotensin system	C09B - Ace inhibitors, combinations	C09BX - Ace inhibitors, other combinations	C09BX04	Perindopril, bisoprolol and amlodipine	-1
C - Cardiovascular system	C09 - Agents acting on the renin-angiotensin system	C09B - Ace inhibitors, combinations	C09BX - Ace inhibitors, other combinations	C09BX05	Ramipril and bisoprolol	-1
C - Cardiovascular system	C09 - Agents acting on the renin-angiotensin system	C09B - Ace inhibitors, combinations	C09BX - Ace inhibitors, other combinations	C09BX06	Perindopril, bisoprolol, amlodipine and indapamide	-1
C - Cardiovascular system	C09 - Agents acting on the renin-angiotensin system	C09B - Ace inhibitors, combinations	C09BX - Ace inhibitors, other combinations	C09BX07	Zofenopril and nebivolol	-1
C - Cardiovascular system	C09 - Agents acting on the renin-angiotensin system	C09C - Angiotensin ii receptor blockers (arbs), plain	C09CA - Angiotensin ii receptor blockers (arbs), plain	C09CA01	Losartan	3961
C - Cardiovascular system	C09 - Agents acting on the renin-angiotensin system	C09C - Angiotensin ii receptor blockers (arbs), plain	C09CA - Angiotensin ii receptor blockers (arbs), plain	C09CA02	Eprosartan	5281037
C - Cardiovascular system	C09 - Agents acting on the renin-angiotensin system	C09C - Angiotensin ii receptor blockers (arbs), plain	C09CA - Angiotensin ii receptor blockers (arbs), plain	C09CA03	Valsartan	60846
C - Cardiovascular system	C09 - Agents acting on the renin-angiotensin system	C09C - Angiotensin ii receptor blockers (arbs), plain	C09CA - Angiotensin ii receptor blockers (arbs), plain	C09CA04	Irbesartan	3749
C - Cardiovascular system	C09 - Agents acting on the renin-angiotensin system	C09C - Angiotensin ii receptor blockers (arbs), plain	C09CA - Angiotensin ii receptor blockers (arbs), plain	C09CA05	Tasosartan	60919
C - Cardiovascular system	C09 - Agents acting on the renin-angiotensin system	C09C - Angiotensin ii receptor blockers (arbs), plain	C09CA - Angiotensin ii receptor blockers (arbs), plain	C09CA06	Candesartan	2541
C - Cardiovascular system	C09 - Agents acting on the renin-angiotensin system	C09C - Angiotensin ii receptor blockers (arbs), plain	C09CA - Angiotensin ii receptor blockers (arbs), plain	C09CA07	Telmisartan	65999
C - Cardiovascular system	C09 - Agents acting on the renin-angiotensin system	C09C - Angiotensin ii receptor blockers (arbs), plain	C09CA - Angiotensin ii receptor blockers (arbs), plain	C09CA08	Olmesartan medoxomil	130881
C - Cardiovascular system	C09 - Agents acting on the renin-angiotensin system	C09C - Angiotensin ii receptor blockers (arbs), plain	C09CA - Angiotensin ii receptor blockers (arbs), plain	C09CA09	Azilsartan medoxomil	135409642
C - Cardiovascular system	C09 - Agents acting on the renin-angiotensin system	C09C - Angiotensin ii receptor blockers (arbs), plain	C09CA - Angiotensin ii receptor blockers (arbs), plain	C09CA10	Fimasartan	9870652
C - Cardiovascular system	C09 - Agents acting on the renin-angiotensin system	C09D - Angiotensin ii receptor blockers (arbs), combinations	C09DA - Angiotensin ii receptor blockers (arbs) and diuretics	C09DA01	Losartan and diuretics	-1
C - Cardiovascular system	C09 - Agents acting on the renin-angiotensin system	C09D - Angiotensin ii receptor blockers (arbs), combinations	C09DA - Angiotensin ii receptor blockers (arbs) and diuretics	C09DA02	Eprosartan and diuretics	-1
C - Cardiovascular system	C09 - Agents acting on the renin-angiotensin system	C09D - Angiotensin ii receptor blockers (arbs), combinations	C09DA - Angiotensin ii receptor blockers (arbs) and diuretics	C09DA03	Valsartan and diuretics	-1
C - Cardiovascular system	C09 - Agents acting on the renin-angiotensin system	C09D - Angiotensin ii receptor blockers (arbs), combinations	C09DA - Angiotensin ii receptor blockers (arbs) and diuretics	C09DA04	Irbesartan and diuretics	-1
C - Cardiovascular system	C09 - Agents acting on the renin-angiotensin system	C09D - Angiotensin ii receptor blockers (arbs), combinations	C09DA - Angiotensin ii receptor blockers (arbs) and diuretics	C09DA06	Candesartan and diuretics	-1
C - Cardiovascular system	C09 - Agents acting on the renin-angiotensin system	C09D - Angiotensin ii receptor blockers (arbs), combinations	C09DA - Angiotensin ii receptor blockers (arbs) and diuretics	C09DA07	Telmisartan and diuretics	-1
C - Cardiovascular system	C09 - Agents acting on the renin-angiotensin system	C09D - Angiotensin ii receptor blockers (arbs), combinations	C09DA - Angiotensin ii receptor blockers (arbs) and diuretics	C09DA08	Olmesartan medoxomil and diuretics	-1
C - Cardiovascular system	C09 - Agents acting on the renin-angiotensin system	C09D - Angiotensin ii receptor blockers (arbs), combinations	C09DA - Angiotensin ii receptor blockers (arbs) and diuretics	C09DA09	Azilsartan medoxomil and diuretics	-1
C - Cardiovascular system	C09 - Agents acting on the renin-angiotensin system	C09D - Angiotensin ii receptor blockers (arbs), combinations	C09DA - Angiotensin ii receptor blockers (arbs) and diuretics	C09DA10	Fimasartan and diuretics	-1
C - Cardiovascular system	C09 - Agents acting on the renin-angiotensin system	C09D - Angiotensin ii receptor blockers (arbs), combinations	C09DB - Angiotensin ii receptor blockers (arbs) and calcium channel blockers	C09DB01	Valsartan and amlodipine	-1
C - Cardiovascular system	C09 - Agents acting on the renin-angiotensin system	C09D - Angiotensin ii receptor blockers (arbs), combinations	C09DB - Angiotensin ii receptor blockers (arbs) and calcium channel blockers	C09DB02	Olmesartan medoxomil and amlodipine	-1
C - Cardiovascular system	C09 - Agents acting on the renin-angiotensin system	C09D - Angiotensin ii receptor blockers (arbs), combinations	C09DB - Angiotensin ii receptor blockers (arbs) and calcium channel blockers	C09DB04	Telmisartan and amlodipine	11672431
C - Cardiovascular system	C09 - Agents acting on the renin-angiotensin system	C09D - Angiotensin ii receptor blockers (arbs), combinations	C09DB - Angiotensin ii receptor blockers (arbs) and calcium channel blockers	C09DB05	Irbesartan and amlodipine	-1
C - Cardiovascular system	C09 - Agents acting on the renin-angiotensin system	C09D - Angiotensin ii receptor blockers (arbs), combinations	C09DB - Angiotensin ii receptor blockers (arbs) and calcium channel blockers	C09DB06	Losartan and amlodipine	-1
C - Cardiovascular system	C09 - Agents acting on the renin-angiotensin system	C09D - Angiotensin ii receptor blockers (arbs), combinations	C09DB - Angiotensin ii receptor blockers (arbs) and calcium channel blockers	C09DB07	Candesartan and amlodipine	-1
C - Cardiovascular system	C09 - Agents acting on the renin-angiotensin system	C09D - Angiotensin ii receptor blockers (arbs), combinations	C09DB - Angiotensin ii receptor blockers (arbs) and calcium channel blockers	C09DB08	Valsartan and lercanidipine	-1
C - Cardiovascular system	C09 - Agents acting on the renin-angiotensin system	C09D - Angiotensin ii receptor blockers (arbs), combinations	C09DB - Angiotensin ii receptor blockers (arbs) and calcium channel blockers	C09DB09	Fimasartan and amlodipine	-1
C - Cardiovascular system	C09 - Agents acting on the renin-angiotensin system	C09D - Angiotensin ii receptor blockers (arbs), combinations	C09DX - Angiotensin ii receptor blockers (arbs), other combinations	C09DX01	Valsartan, amlodipine and hydrochlorothiazide	-1
C - Cardiovascular system	C09 - Agents acting on the renin-angiotensin system	C09D - Angiotensin ii receptor blockers (arbs), combinations	C09DX - Angiotensin ii receptor blockers (arbs), other combinations	C09DX02	Valsartan and aliskiren	-1
C - Cardiovascular system	C09 - Agents acting on the renin-angiotensin system	C09D - Angiotensin ii receptor blockers (arbs), combinations	C09DX - Angiotensin ii receptor blockers (arbs), other combinations	C09DX03	Olmesartan medoxomil, amlodipine and hydrochlorothiazide	-1
C - Cardiovascular system	C09 - Agents acting on the renin-angiotensin system	C09D - Angiotensin ii receptor blockers (arbs), combinations	C09DX - Angiotensin ii receptor blockers (arbs), other combinations	C09DX04	Valsartan and sacubitril	-1
C - Cardiovascular system	C09 - Agents acting on the renin-angiotensin system	C09D - Angiotensin ii receptor blockers (arbs), combinations	C09DX - Angiotensin ii receptor blockers (arbs), other combinations	C09DX05	Valsartan and nebivolol	-1
C - Cardiovascular system	C09 - Agents acting on the renin-angiotensin system	C09D - Angiotensin ii receptor blockers (arbs), combinations	C09DX - Angiotensin ii receptor blockers (arbs), other combinations	C09DX06	Candesartan, amlodipine and hydrochlorothiazide	-1
C - Cardiovascular system	C09 - Agents acting on the renin-angiotensin system	C09D - Angiotensin ii receptor blockers (arbs), combinations	C09DX - Angiotensin ii receptor blockers (arbs), other combinations	C09DX07	Irbesartan, amlodipine and hydrochlorothiazide	-1
C - Cardiovascular system	C09 - Agents acting on the renin-angiotensin system	C09D - Angiotensin ii receptor blockers (arbs), combinations	C09DX - Angiotensin ii receptor blockers (arbs), other combinations	C09DX08	Telmisartan, amlodipine and hydrochlorothiazide	-1
C - Cardiovascular system	C09 - Agents acting on the renin-angiotensin system	C09X - Other agents acting on the renin-angiotensin system	C09XA - Renin-inhibitors	C09XA01	Remikiren	6324659
C - Cardiovascular system	C09 - Agents acting on the renin-angiotensin system	C09X - Other agents acting on the renin-angiotensin system	C09XA - Renin-inhibitors	C09XA02	Aliskiren	5493444
C - Cardiovascular system	C09 - Agents acting on the renin-angiotensin system	C09X - Other agents acting on the renin-angiotensin system	C09XA - Renin-inhibitors	C09XA52	Aliskiren and hydrochlorothiazide	-1
C - Cardiovascular system	C09 - Agents acting on the renin-angiotensin system	C09X - Other agents acting on the renin-angiotensin system	C09XA - Renin-inhibitors	C09XA53	Aliskiren and amlodipine	-1
C - Cardiovascular system	C09 - Agents acting on the renin-angiotensin system	C09X - Other agents acting on the renin-angiotensin system	C09XA - Renin-inhibitors	C09XA54	Aliskiren, amlodipine and hydrochlorothiazide	-1
C - Cardiovascular system	C10 - Lipid modifying agents	C10A - Lipid modifying agents, plain	C10AA - Hmg coa reductase inhibitors	C10AA01	Simvastatin	54454
C - Cardiovascular system	C10 - Lipid modifying agents	C10A - Lipid modifying agents, plain	C10AA - Hmg coa reductase inhibitors	C10AA02	Lovastatin	53232
C - Cardiovascular system	C10 - Lipid modifying agents	C10A - Lipid modifying agents, plain	C10AA - Hmg coa reductase inhibitors	C10AA03	Pravastatin	54687
C - Cardiovascular system	C10 - Lipid modifying agents	C10A - Lipid modifying agents, plain	C10AA - Hmg coa reductase inhibitors	C10AA04	Fluvastatin	446155
C - Cardiovascular system	C10 - Lipid modifying agents	C10A - Lipid modifying agents, plain	C10AA - Hmg coa reductase inhibitors	C10AA05	Atorvastatin	60823
C - Cardiovascular system	C10 - Lipid modifying agents	C10A - Lipid modifying agents, plain	C10AA - Hmg coa reductase inhibitors	C10AA06	Cerivastatin	446156
C - Cardiovascular system	C10 - Lipid modifying agents	C10A - Lipid modifying agents, plain	C10AA - Hmg coa reductase inhibitors	C10AA07	Rosuvastatin	446157
C - Cardiovascular system	C10 - Lipid modifying agents	C10A - Lipid modifying agents, plain	C10AA - Hmg coa reductase inhibitors	C10AA08	Pitavastatin	5282452
C - Cardiovascular system	C10 - Lipid modifying agents	C10A - Lipid modifying agents, plain	C10AB - Fibrates	C10AB01	Clofibrate	2796
C - Cardiovascular system	C10 - Lipid modifying agents	C10A - Lipid modifying agents, plain	C10AB - Fibrates	C10AB02	Bezafibrate	39042
C - Cardiovascular system	C10 - Lipid modifying agents	C10A - Lipid modifying agents, plain	C10AB - Fibrates	C10AB03	Aluminium clofibrate	-1
C - Cardiovascular system	C10 - Lipid modifying agents	C10A - Lipid modifying agents, plain	C10AB - Fibrates	C10AB04	Gemfibrozil	3463
C - Cardiovascular system	C10 - Lipid modifying agents	C10A - Lipid modifying agents, plain	C10AB - Fibrates	C10AB05	Fenofibrate	3339
C - Cardiovascular system	C10 - Lipid modifying agents	C10A - Lipid modifying agents, plain	C10AB - Fibrates	C10AB06	Simfibrate	5217
C - Cardiovascular system	C10 - Lipid modifying agents	C10A - Lipid modifying agents, plain	C10AB - Fibrates	C10AB07	Ronifibrate	68671
C - Cardiovascular system	C10 - Lipid modifying agents	C10A - Lipid modifying agents, plain	C10AB - Fibrates	C10AB08	Ciprofibrate	2763
C - Cardiovascular system	C10 - Lipid modifying agents	C10A - Lipid modifying agents, plain	C10AB - Fibrates	C10AB09	Etofibrate	65777
C - Cardiovascular system	C10 - Lipid modifying agents	C10A - Lipid modifying agents, plain	C10AB - Fibrates	C10AB10	Clofibride	160134
C - Cardiovascular system	C10 - Lipid modifying agents	C10A - Lipid modifying agents, plain	C10AB - Fibrates	C10AB11	Choline fenofibrate	11350701
C - Cardiovascular system	C10 - Lipid modifying agents	C10A - Lipid modifying agents, plain	C10AB - Fibrates	C10AB12	Pemafibrate	11526038
C - Cardiovascular system	C10 - Lipid modifying agents	C10A - Lipid modifying agents, plain	C10AC - Bile acid sequestrants	C10AC01	Colestyramine	70695640
C - Cardiovascular system	C10 - Lipid modifying agents	C10A - Lipid modifying agents, plain	C10AC - Bile acid sequestrants	C10AC02	Colestipol	62816
C - Cardiovascular system	C10 - Lipid modifying agents	C10A - Lipid modifying agents, plain	C10AC - Bile acid sequestrants	C10AC03	Colextran	230181
C - Cardiovascular system	C10 - Lipid modifying agents	C10A - Lipid modifying agents, plain	C10AC - Bile acid sequestrants	C10AC04	Colesevelam	160051
C - Cardiovascular system	C10 - Lipid modifying agents	C10A - Lipid modifying agents, plain	C10AD - Nicotinic acid and derivatives	C10AD01	Niceritrol	4476
C - Cardiovascular system	C10 - Lipid modifying agents	C10A - Lipid modifying agents, plain	C10AD - Nicotinic acid and derivatives	C10AD02	Nicotinic acid	938
C - Cardiovascular system	C10 - Lipid modifying agents	C10A - Lipid modifying agents, plain	C10AD - Nicotinic acid and derivatives	C10AD03	Nicofuranose	25495
C - Cardiovascular system	C10 - Lipid modifying agents	C10A - Lipid modifying agents, plain	C10AD - Nicotinic acid and derivatives	C10AD04	Aluminium nicotinate	16098
C - Cardiovascular system	C10 - Lipid modifying agents	C10A - Lipid modifying agents, plain	C10AD - Nicotinic acid and derivatives	C10AD05	Nicotinyl alcohol (pyridylcarbinol)	7510
C - Cardiovascular system	C10 - Lipid modifying agents	C10A - Lipid modifying agents, plain	C10AD - Nicotinic acid and derivatives	C10AD06	Acipimox	5310993
C - Cardiovascular system	C10 - Lipid modifying agents	C10A - Lipid modifying agents, plain	C10AD - Nicotinic acid and derivatives	C10AD52	Nicotinic acid, combinations	-1
C - Cardiovascular system	C10 - Lipid modifying agents	C10A - Lipid modifying agents, plain	C10AX - Other lipid modifying agents	C10AX01	Dextrothyroxine	8730
C - Cardiovascular system	C10 - Lipid modifying agents	C10A - Lipid modifying agents, plain	C10AX - Other lipid modifying agents	C10AX02	Probucol	4912
C - Cardiovascular system	C10 - Lipid modifying agents	C10A - Lipid modifying agents, plain	C10AX - Other lipid modifying agents	C10AX03	Tiadenol	23403
C - Cardiovascular system	C10 - Lipid modifying agents	C10A - Lipid modifying agents, plain	C10AX - Other lipid modifying agents	C10AX05	Meglutol	1662
C - Cardiovascular system	C10 - Lipid modifying agents	C10A - Lipid modifying agents, plain	C10AX - Other lipid modifying agents	C10AX06	Omega-3-triglycerides incl. other esters and acids	-1
C - Cardiovascular system	C10 - Lipid modifying agents	C10A - Lipid modifying agents, plain	C10AX - Other lipid modifying agents	C10AX07	Magnesium pyridoxal 5-phosphate glutamate	15391180
C - Cardiovascular system	C10 - Lipid modifying agents	C10A - Lipid modifying agents, plain	C10AX - Other lipid modifying agents	C10AX08	Policosanol	1031
C - Cardiovascular system	C10 - Lipid modifying agents	C10A - Lipid modifying agents, plain	C10AX - Other lipid modifying agents	C10AX09	Ezetimibe	150311
C - Cardiovascular system	C10 - Lipid modifying agents	C10A - Lipid modifying agents, plain	C10AX - Other lipid modifying agents	C10AX10	Alipogene tiparvovec	-1
C - Cardiovascular system	C10 - Lipid modifying agents	C10A - Lipid modifying agents, plain	C10AX - Other lipid modifying agents	C10AX11	Mipomersen	71301230
C - Cardiovascular system	C10 - Lipid modifying agents	C10A - Lipid modifying agents, plain	C10AX - Other lipid modifying agents	C10AX12	Lomitapide	9853053
C - Cardiovascular system	C10 - Lipid modifying agents	C10A - Lipid modifying agents, plain	C10AX - Other lipid modifying agents	C10AX13	Evolocumab	-1
C - Cardiovascular system	C10 - Lipid modifying agents	C10A - Lipid modifying agents, plain	C10AX - Other lipid modifying agents	C10AX14	Alirocumab	-1
C - Cardiovascular system	C10 - Lipid modifying agents	C10A - Lipid modifying agents, plain	C10AX - Other lipid modifying agents	C10AX15	Bempedoic acid	10472693
C - Cardiovascular system	C10 - Lipid modifying agents	C10A - Lipid modifying agents, plain	C10AX - Other lipid modifying agents	C10AX16	Inclisiran	126480325
C - Cardiovascular system	C10 - Lipid modifying agents	C10A - Lipid modifying agents, plain	C10AX - Other lipid modifying agents	C10AX17	Evinacumab	-1
C - Cardiovascular system	C10 - Lipid modifying agents	C10A - Lipid modifying agents, plain	C10AX - Other lipid modifying agents	C10AX18	Volanesorsen	121494123
C - Cardiovascular system	C10 - Lipid modifying agents	C10B - Lipid modifying agents, combinations	C10BA - Combinations of various lipid modifying agents	C10BA01	Lovastatin and nicotinic acid	-1
C - Cardiovascular system	C10 - Lipid modifying agents	C10B - Lipid modifying agents, combinations	C10BA - Combinations of various lipid modifying agents	C10BA02	Simvastatin and ezetimibe	9832423
C - Cardiovascular system	C10 - Lipid modifying agents	C10B - Lipid modifying agents, combinations	C10BA - Combinations of various lipid modifying agents	C10BA03	Pravastatin and fenofibrate	-1
C - Cardiovascular system	C10 - Lipid modifying agents	C10B - Lipid modifying agents, combinations	C10BA - Combinations of various lipid modifying agents	C10BA04	Simvastatin and fenofibrate	-1
C - Cardiovascular system	C10 - Lipid modifying agents	C10B - Lipid modifying agents, combinations	C10BA - Combinations of various lipid modifying agents	C10BA05	Atorvastatin and ezetimibe	-1
C - Cardiovascular system	C10 - Lipid modifying agents	C10B - Lipid modifying agents, combinations	C10BA - Combinations of various lipid modifying agents	C10BA06	Rosuvastatin and ezetimibe	-1
C - Cardiovascular system	C10 - Lipid modifying agents	C10B - Lipid modifying agents, combinations	C10BA - Combinations of various lipid modifying agents	C10BA07	Rosuvastatin and omega-3 fatty acids	-1
C - Cardiovascular system	C10 - Lipid modifying agents	C10B - Lipid modifying agents, combinations	C10BA - Combinations of various lipid modifying agents	C10BA08	Atorvastatin and omega-3 fatty acids	-1
C - Cardiovascular system	C10 - Lipid modifying agents	C10B - Lipid modifying agents, combinations	C10BA - Combinations of various lipid modifying agents	C10BA09	Rosuvastatin and fenofibrate	-1
C - Cardiovascular system	C10 - Lipid modifying agents	C10B - Lipid modifying agents, combinations	C10BA - Combinations of various lipid modifying agents	C10BA10	Bempedoic acid and ezetimibe	-1
C - Cardiovascular system	C10 - Lipid modifying agents	C10B - Lipid modifying agents, combinations	C10BA - Combinations of various lipid modifying agents	C10BA11	Pravastatin and ezetimibe	-1
C - Cardiovascular system	C10 - Lipid modifying agents	C10B - Lipid modifying agents, combinations	C10BA - Combinations of various lipid modifying agents	C10BA12	Pravastatin, ezetimibe and fenofibrate	-1
C - Cardiovascular system	C10 - Lipid modifying agents	C10B - Lipid modifying agents, combinations	C10BX - Lipid modifying agents in combination with other drugs	C10BX01	Simvastatin and acetylsalicylic acid	-1
C - Cardiovascular system	C10 - Lipid modifying agents	C10B - Lipid modifying agents, combinations	C10BX - Lipid modifying agents in combination with other drugs	C10BX02	Pravastatin and acetylsalicylic acid	-1
C - Cardiovascular system	C10 - Lipid modifying agents	C10B - Lipid modifying agents, combinations	C10BX - Lipid modifying agents in combination with other drugs	C10BX03	Atorvastatin and amlodipine	-1
C - Cardiovascular system	C10 - Lipid modifying agents	C10B - Lipid modifying agents, combinations	C10BX - Lipid modifying agents in combination with other drugs	C10BX04	Simvastatin, acetylsalicylic acid and ramipril	-1
C - Cardiovascular system	C10 - Lipid modifying agents	C10B - Lipid modifying agents, combinations	C10BX - Lipid modifying agents in combination with other drugs	C10BX05	Rosuvastatin and acetylsalicylic acid	-1
C - Cardiovascular system	C10 - Lipid modifying agents	C10B - Lipid modifying agents, combinations	C10BX - Lipid modifying agents in combination with other drugs	C10BX06	Atorvastatin, acetylsalicylic acid and ramipril	-1
C - Cardiovascular system	C10 - Lipid modifying agents	C10B - Lipid modifying agents, combinations	C10BX - Lipid modifying agents in combination with other drugs	C10BX07	Rosuvastatin, amlodipine and lisinopril	-1
C - Cardiovascular system	C10 - Lipid modifying agents	C10B - Lipid modifying agents, combinations	C10BX - Lipid modifying agents in combination with other drugs	C10BX08	Atorvastatin and acetylsalicylic acid	-1
C - Cardiovascular system	C10 - Lipid modifying agents	C10B - Lipid modifying agents, combinations	C10BX - Lipid modifying agents in combination with other drugs	C10BX09	Rosuvastatin and amlodipine	-1
C - Cardiovascular system	C10 - Lipid modifying agents	C10B - Lipid modifying agents, combinations	C10BX - Lipid modifying agents in combination with other drugs	C10BX10	Rosuvastatin and valsartan	-1
C - Cardiovascular system	C10 - Lipid modifying agents	C10B - Lipid modifying agents, combinations	C10BX - Lipid modifying agents in combination with other drugs	C10BX11	Atorvastatin, amlodipine and perindopril	-1
C - Cardiovascular system	C10 - Lipid modifying agents	C10B - Lipid modifying agents, combinations	C10BX - Lipid modifying agents in combination with other drugs	C10BX12	Atorvastatin, acetylsalicylic acid and perindopril	-1
C - Cardiovascular system	C10 - Lipid modifying agents	C10B - Lipid modifying agents, combinations	C10BX - Lipid modifying agents in combination with other drugs	C10BX13	Rosuvastatin, perindopril and indapamide	-1
C - Cardiovascular system	C10 - Lipid modifying agents	C10B - Lipid modifying agents, combinations	C10BX - Lipid modifying agents in combination with other drugs	C10BX14	Rosuvastatin, amlodipine and perindopril	-1
C - Cardiovascular system	C10 - Lipid modifying agents	C10B - Lipid modifying agents, combinations	C10BX - Lipid modifying agents in combination with other drugs	C10BX15	Atorvastatin and perindopril	-1
C - Cardiovascular system	C10 - Lipid modifying agents	C10B - Lipid modifying agents, combinations	C10BX - Lipid modifying agents in combination with other drugs	C10BX16	Rosuvastatin and fimasartan	-1
C - Cardiovascular system	C10 - Lipid modifying agents	C10B - Lipid modifying agents, combinations	C10BX - Lipid modifying agents in combination with other drugs	C10BX17	Rosuvastatin and ramipril	-1
C - Cardiovascular system	C10 - Lipid modifying agents	C10B - Lipid modifying agents, combinations	C10BX - Lipid modifying agents in combination with other drugs	C10BX18	Atorvastatin, amlodipine and ramipril	-1
C - Cardiovascular system	C10 - Lipid modifying agents	C10B - Lipid modifying agents, combinations	C10BX - Lipid modifying agents in combination with other drugs	C10BX19	Atorvastatin, amlodipine and candesartan	-1
C - Cardiovascular system	C10 - Lipid modifying agents	C10B - Lipid modifying agents, combinations	C10BX - Lipid modifying agents in combination with other drugs	C10BX20	Rosuvastatin and telmisartan	-1
C - Cardiovascular system	C10 - Lipid modifying agents	C10B - Lipid modifying agents, combinations	C10BX - Lipid modifying agents in combination with other drugs	C10BX21	Rosuvastatin and perindopril	-1
D - Dermatologicals	D01 - Antifungals for dermatological use	D01A - Antifungals for topical use	D01AA - Antibiotics	D01AA01	Nystatin	6433272
D - Dermatologicals	D01 - Antifungals for dermatological use	D01A - Antifungals for topical use	D01AA - Antibiotics	D01AA02	Natamycin	5284447
D - Dermatologicals	D01 - Antifungals for dermatological use	D01A - Antifungals for topical use	D01AA - Antibiotics	D01AA03	Hachimycin	24883860
D - Dermatologicals	D01 - Antifungals for dermatological use	D01A - Antifungals for topical use	D01AA - Antibiotics	D01AA04	Pecilocin	5282176
D - Dermatologicals	D01 - Antifungals for dermatological use	D01A - Antifungals for topical use	D01AA - Antibiotics	D01AA06	Mepartricin	-1
D - Dermatologicals	D01 - Antifungals for dermatological use	D01A - Antifungals for topical use	D01AA - Antibiotics	D01AA07	Pyrrolnitrin	13916
D - Dermatologicals	D01 - Antifungals for dermatological use	D01A - Antifungals for topical use	D01AA - Antibiotics	D01AA08	Griseofulvin	441140
D - Dermatologicals	D01 - Antifungals for dermatological use	D01A - Antifungals for topical use	D01AA - Antibiotics	D01AA20	Combinations	-1
D - Dermatologicals	D01 - Antifungals for dermatological use	D01A - Antifungals for topical use	D01AC - Imidazole and triazole derivatives	D01AC01	Clotrimazole	2812
D - Dermatologicals	D01 - Antifungals for dermatological use	D01A - Antifungals for topical use	D01AC - Imidazole and triazole derivatives	D01AC02	Miconazole	4189
D - Dermatologicals	D01 - Antifungals for dermatological use	D01A - Antifungals for topical use	D01AC - Imidazole and triazole derivatives	D01AC03	Econazole	3198
D - Dermatologicals	D01 - Antifungals for dermatological use	D01A - Antifungals for topical use	D01AC - Imidazole and triazole derivatives	D01AC04	Chlormidazole	71821
D - Dermatologicals	D01 - Antifungals for dermatological use	D01A - Antifungals for topical use	D01AC - Imidazole and triazole derivatives	D01AC05	Isoconazole	3760
D - Dermatologicals	D01 - Antifungals for dermatological use	D01A - Antifungals for topical use	D01AC - Imidazole and triazole derivatives	D01AC06	Tiabendazole	5430
D - Dermatologicals	D01 - Antifungals for dermatological use	D01A - Antifungals for topical use	D01AC - Imidazole and triazole derivatives	D01AC07	Tioconazole	5482
D - Dermatologicals	D01 - Antifungals for dermatological use	D01A - Antifungals for topical use	D01AC - Imidazole and triazole derivatives	D01AC08	Ketoconazole	456201
D - Dermatologicals	D01 - Antifungals for dermatological use	D01A - Antifungals for topical use	D01AC - Imidazole and triazole derivatives	D01AC09	Sulconazole	5318
D - Dermatologicals	D01 - Antifungals for dermatological use	D01A - Antifungals for topical use	D01AC - Imidazole and triazole derivatives	D01AC10	Bifonazole	2378
D - Dermatologicals	D01 - Antifungals for dermatological use	D01A - Antifungals for topical use	D01AC - Imidazole and triazole derivatives	D01AC11	Oxiconazole	5353853
D - Dermatologicals	D01 - Antifungals for dermatological use	D01A - Antifungals for topical use	D01AC - Imidazole and triazole derivatives	D01AC12	Fenticonazole	51755
D - Dermatologicals	D01 - Antifungals for dermatological use	D01A - Antifungals for topical use	D01AC - Imidazole and triazole derivatives	D01AC13	Omoconazole	3033988
D - Dermatologicals	D01 - Antifungals for dermatological use	D01A - Antifungals for topical use	D01AC - Imidazole and triazole derivatives	D01AC14	Sertaconazole	65863
D - Dermatologicals	D01 - Antifungals for dermatological use	D01A - Antifungals for topical use	D01AC - Imidazole and triazole derivatives	D01AC15	Fluconazole	3365
D - Dermatologicals	D01 - Antifungals for dermatological use	D01A - Antifungals for topical use	D01AC - Imidazole and triazole derivatives	D01AC16	Flutrimazole	3401
D - Dermatologicals	D01 - Antifungals for dermatological use	D01A - Antifungals for topical use	D01AC - Imidazole and triazole derivatives	D01AC17	Eberconazole	72051
D - Dermatologicals	D01 - Antifungals for dermatological use	D01A - Antifungals for topical use	D01AC - Imidazole and triazole derivatives	D01AC18	Luliconazole	3003141
D - Dermatologicals	D01 - Antifungals for dermatological use	D01A - Antifungals for topical use	D01AC - Imidazole and triazole derivatives	D01AC19	Efinaconazole	489181
D - Dermatologicals	D01 - Antifungals for dermatological use	D01A - Antifungals for topical use	D01AC - Imidazole and triazole derivatives	D01AC20	Imidazoles/triazoles in combination with corticosteroids	-1
D - Dermatologicals	D01 - Antifungals for dermatological use	D01A - Antifungals for topical use	D01AC - Imidazole and triazole derivatives	D01AC21	Neticonazole	5282433
D - Dermatologicals	D01 - Antifungals for dermatological use	D01A - Antifungals for topical use	D01AC - Imidazole and triazole derivatives	D01AC22	Lanoconazole	3002820
D - Dermatologicals	D01 - Antifungals for dermatological use	D01A - Antifungals for topical use	D01AC - Imidazole and triazole derivatives	D01AC52	Miconazole, combinations	-1
D - Dermatologicals	D01 - Antifungals for dermatological use	D01A - Antifungals for topical use	D01AC - Imidazole and triazole derivatives	D01AC60	Bifonazole, combinations	-1
D - Dermatologicals	D01 - Antifungals for dermatological use	D01A - Antifungals for topical use	D01AE - Other antifungals for topical use	D01AE01	Bromochlorosalicylanilide	77254
D - Dermatologicals	D01 - Antifungals for dermatological use	D01A - Antifungals for topical use	D01AE - Other antifungals for topical use	D01AE02	Methylrosaniline	68050
D - Dermatologicals	D01 - Antifungals for dermatological use	D01A - Antifungals for topical use	D01AE - Other antifungals for topical use	D01AE03	Tribromometacresol	20737
D - Dermatologicals	D01 - Antifungals for dermatological use	D01A - Antifungals for topical use	D01AE - Other antifungals for topical use	D01AE04	Undecylenic acid	5634
D - Dermatologicals	D01 - Antifungals for dermatological use	D01A - Antifungals for topical use	D01AE - Other antifungals for topical use	D01AE05	Polynoxylin	-1
D - Dermatologicals	D01 - Antifungals for dermatological use	D01A - Antifungals for topical use	D01AE - Other antifungals for topical use	D01AE06	2-(4-chlorphenoxy)-ethanol	15907
D - Dermatologicals	D01 - Antifungals for dermatological use	D01A - Antifungals for topical use	D01AE - Other antifungals for topical use	D01AE07	Chlorphenesin	7697
D - Dermatologicals	D01 - Antifungals for dermatological use	D01A - Antifungals for topical use	D01AE - Other antifungals for topical use	D01AE08	Ticlatone	6258
D - Dermatologicals	D01 - Antifungals for dermatological use	D01A - Antifungals for topical use	D01AE - Other antifungals for topical use	D01AE09	Sulbentine	67686
D - Dermatologicals	D01 - Antifungals for dermatological use	D01A - Antifungals for topical use	D01AE - Other antifungals for topical use	D01AE10	Ethyl hydroxybenzoate	-1
D - Dermatologicals	D01 - Antifungals for dermatological use	D01A - Antifungals for topical use	D01AE - Other antifungals for topical use	D01AE11	Haloprogin	3561
D - Dermatologicals	D01 - Antifungals for dermatological use	D01A - Antifungals for topical use	D01AE - Other antifungals for topical use	D01AE12	Salicylic acid	338
D - Dermatologicals	D01 - Antifungals for dermatological use	D01A - Antifungals for topical use	D01AE - Other antifungals for topical use	D01AE13	Selenium sulfide	24011
D - Dermatologicals	D01 - Antifungals for dermatological use	D01A - Antifungals for topical use	D01AE - Other antifungals for topical use	D01AE14	Ciclopirox	2749
D - Dermatologicals	D01 - Antifungals for dermatological use	D01A - Antifungals for topical use	D01AE - Other antifungals for topical use	D01AE15	Terbinafine	1549008
D - Dermatologicals	D01 - Antifungals for dermatological use	D01A - Antifungals for topical use	D01AE - Other antifungals for topical use	D01AE16	Amorolfine	54260
D - Dermatologicals	D01 - Antifungals for dermatological use	D01A - Antifungals for topical use	D01AE - Other antifungals for topical use	D01AE17	Dimazole	8708
D - Dermatologicals	D01 - Antifungals for dermatological use	D01A - Antifungals for topical use	D01AE - Other antifungals for topical use	D01AE18	Tolnaftate	5510
D - Dermatologicals	D01 - Antifungals for dermatological use	D01A - Antifungals for topical use	D01AE - Other antifungals for topical use	D01AE19	Tolciclate	5506
D - Dermatologicals	D01 - Antifungals for dermatological use	D01A - Antifungals for topical use	D01AE - Other antifungals for topical use	D01AE20	Combinations	-1
D - Dermatologicals	D01 - Antifungals for dermatological use	D01A - Antifungals for topical use	D01AE - Other antifungals for topical use	D01AE21	Flucytosine	3366
D - Dermatologicals	D01 - Antifungals for dermatological use	D01A - Antifungals for topical use	D01AE - Other antifungals for topical use	D01AE22	Naftifine	47641
D - Dermatologicals	D01 - Antifungals for dermatological use	D01A - Antifungals for topical use	D01AE - Other antifungals for topical use	D01AE23	Butenafine	2484
D - Dermatologicals	D01 - Antifungals for dermatological use	D01A - Antifungals for topical use	D01AE - Other antifungals for topical use	D01AE24	Tavaborole	11499245
D - Dermatologicals	D01 - Antifungals for dermatological use	D01A - Antifungals for topical use	D01AE - Other antifungals for topical use	D01AE25	Liranaftate	3936
D - Dermatologicals	D01 - Antifungals for dermatological use	D01A - Antifungals for topical use	D01AE - Other antifungals for topical use	D01AE54	Undecylenic acid, combinations	-1
D - Dermatologicals	D01 - Antifungals for dermatological use	D01B - Antifungals for systemic use	D01BA - Antifungals for systemic use	D01BA01	Griseofulvin	441140
D - Dermatologicals	D01 - Antifungals for dermatological use	D01B - Antifungals for systemic use	D01BA - Antifungals for systemic use	D01BA02	Terbinafine	1549008
D - Dermatologicals	D01 - Antifungals for dermatological use	D01B - Antifungals for systemic use	D01BA - Antifungals for systemic use	D01BA03	Fosravuconazole	9807507
D - Dermatologicals	D02 - Emollients and protectives	D02A - Emollients and protectives	D02AE - Carbamide products	D02AE01	Carbamide	1176
D - Dermatologicals	D02 - Emollients and protectives	D02A - Emollients and protectives	D02AE - Carbamide products	D02AE51	Carbamide, combinations	-1
D - Dermatologicals	D02 - Emollients and protectives	D02B - Protectives against uv-radiation	D02BA - Protectives against uv-radiation for topical use	D02BA01	Aminobenzoic acid	978
D - Dermatologicals	D02 - Emollients and protectives	D02B - Protectives against uv-radiation	D02BA - Protectives against uv-radiation for topical use	D02BA02	Octinoxate	5355130
D - Dermatologicals	D02 - Emollients and protectives	D02B - Protectives against uv-radiation	D02BB - Protectives against uv-radiation for systemic use	D02BB01	Betacarotene	5280489
D - Dermatologicals	D02 - Emollients and protectives	D02B - Protectives against uv-radiation	D02BB - Protectives against uv-radiation for systemic use	D02BB02	Afamelanotide	16197727
D - Dermatologicals	D03 - Preparations for treatment of wounds and ulcers	D03A - Cicatrizants	D03AX - Other cicatrizants	D03AX01	Cadexomer iodine	-1
D - Dermatologicals	D03 - Preparations for treatment of wounds and ulcers	D03A - Cicatrizants	D03AX - Other cicatrizants	D03AX02	Dextranomer	-1
D - Dermatologicals	D03 - Preparations for treatment of wounds and ulcers	D03A - Cicatrizants	D03AX - Other cicatrizants	D03AX03	Dexpanthenol	131204
D - Dermatologicals	D03 - Preparations for treatment of wounds and ulcers	D03A - Cicatrizants	D03AX - Other cicatrizants	D03AX04	Calcium pantothenate	443753
D - Dermatologicals	D03 - Preparations for treatment of wounds and ulcers	D03A - Cicatrizants	D03AX - Other cicatrizants	D03AX05	Hyaluronic acid	-1
D - Dermatologicals	D03 - Preparations for treatment of wounds and ulcers	D03A - Cicatrizants	D03AX - Other cicatrizants	D03AX06	Becaplermin	-1
D - Dermatologicals	D03 - Preparations for treatment of wounds and ulcers	D03A - Cicatrizants	D03AX - Other cicatrizants	D03AX09	Crilanomer	-1
D - Dermatologicals	D03 - Preparations for treatment of wounds and ulcers	D03A - Cicatrizants	D03AX - Other cicatrizants	D03AX10	Enoxolone	10114
D - Dermatologicals	D03 - Preparations for treatment of wounds and ulcers	D03A - Cicatrizants	D03AX - Other cicatrizants	D03AX11	Sodium chlorite	23668197
D - Dermatologicals	D03 - Preparations for treatment of wounds and ulcers	D03A - Cicatrizants	D03AX - Other cicatrizants	D03AX12	Trolamine	7618
D - Dermatologicals	D03 - Preparations for treatment of wounds and ulcers	D03A - Cicatrizants	D03AX - Other cicatrizants	D03AX13	Betulae cortex	-1
D - Dermatologicals	D03 - Preparations for treatment of wounds and ulcers	D03A - Cicatrizants	D03AX - Other cicatrizants	D03AX14	Centella asiatica herba, incl. combinations	-1
D - Dermatologicals	D03 - Preparations for treatment of wounds and ulcers	D03A - Cicatrizants	D03AX - Other cicatrizants	D03AX15	Trafermin	-1
D - Dermatologicals	D03 - Preparations for treatment of wounds and ulcers	D03A - Cicatrizants	D03AX - Other cicatrizants	D03AX16	Beremagene geperpavec	-1
D - Dermatologicals	D03 - Preparations for treatment of wounds and ulcers	D03B - Enzymes	D03BA - Proteolytic enzymes	D03BA01	Trypsin	-1
D - Dermatologicals	D03 - Preparations for treatment of wounds and ulcers	D03B - Enzymes	D03BA - Proteolytic enzymes	D03BA02	Collagenase	75007581
D - Dermatologicals	D03 - Preparations for treatment of wounds and ulcers	D03B - Enzymes	D03BA - Proteolytic enzymes	D03BA03	Bromelains	-1
D - Dermatologicals	D03 - Preparations for treatment of wounds and ulcers	D03B - Enzymes	D03BA - Proteolytic enzymes	D03BA52	Collagenase, combinations	-1
D - Dermatologicals	D04 - Antipruritics, incl. antihistamines, anesthetics, etc.	D04A - Antipruritics, incl. antihistamines, anesthetics, etc.	D04AA - Antihistamines for topical use	D04AA01	Thonzylamine	5457
D - Dermatologicals	D04 - Antipruritics, incl. antihistamines, anesthetics, etc.	D04A - Antipruritics, incl. antihistamines, anesthetics, etc.	D04AA - Antihistamines for topical use	D04AA02	Mepyramine	4992
D - Dermatologicals	D04 - Antipruritics, incl. antihistamines, anesthetics, etc.	D04A - Antipruritics, incl. antihistamines, anesthetics, etc.	D04AA - Antihistamines for topical use	D04AA03	Thenalidine	27901
D - Dermatologicals	D04 - Antipruritics, incl. antihistamines, anesthetics, etc.	D04A - Antipruritics, incl. antihistamines, anesthetics, etc.	D04AA - Antihistamines for topical use	D04AA04	Tripelennamine	5587
D - Dermatologicals	D04 - Antipruritics, incl. antihistamines, anesthetics, etc.	D04A - Antipruritics, incl. antihistamines, anesthetics, etc.	D04AA - Antihistamines for topical use	D04AA09	Chloropyramine	25295
D - Dermatologicals	D04 - Antipruritics, incl. antihistamines, anesthetics, etc.	D04A - Antipruritics, incl. antihistamines, anesthetics, etc.	D04AA - Antihistamines for topical use	D04AA10	Promethazine	4927
D - Dermatologicals	D04 - Antipruritics, incl. antihistamines, anesthetics, etc.	D04A - Antipruritics, incl. antihistamines, anesthetics, etc.	D04AA - Antihistamines for topical use	D04AA12	Tolpropamine	72141
D - Dermatologicals	D04 - Antipruritics, incl. antihistamines, anesthetics, etc.	D04A - Antipruritics, incl. antihistamines, anesthetics, etc.	D04AA - Antihistamines for topical use	D04AA13	Dimetindene	21855
D - Dermatologicals	D04 - Antipruritics, incl. antihistamines, anesthetics, etc.	D04A - Antipruritics, incl. antihistamines, anesthetics, etc.	D04AA - Antihistamines for topical use	D04AA14	Clemastine	26987
D - Dermatologicals	D04 - Antipruritics, incl. antihistamines, anesthetics, etc.	D04A - Antipruritics, incl. antihistamines, anesthetics, etc.	D04AA - Antihistamines for topical use	D04AA15	Bamipine	72075
D - Dermatologicals	D04 - Antipruritics, incl. antihistamines, anesthetics, etc.	D04A - Antipruritics, incl. antihistamines, anesthetics, etc.	D04AA - Antihistamines for topical use	D04AA16	Pheniramine	4761
D - Dermatologicals	D04 - Antipruritics, incl. antihistamines, anesthetics, etc.	D04A - Antipruritics, incl. antihistamines, anesthetics, etc.	D04AA - Antihistamines for topical use	D04AA22	Isothipendyl	3781
D - Dermatologicals	D04 - Antipruritics, incl. antihistamines, anesthetics, etc.	D04A - Antipruritics, incl. antihistamines, anesthetics, etc.	D04AA - Antihistamines for topical use	D04AA32	Diphenhydramine	3100
D - Dermatologicals	D04 - Antipruritics, incl. antihistamines, anesthetics, etc.	D04A - Antipruritics, incl. antihistamines, anesthetics, etc.	D04AA - Antihistamines for topical use	D04AA33	Diphenhydramine methylbromide	-1
D - Dermatologicals	D04 - Antipruritics, incl. antihistamines, anesthetics, etc.	D04A - Antipruritics, incl. antihistamines, anesthetics, etc.	D04AA - Antihistamines for topical use	D04AA34	Chlorphenoxamine	6475
D - Dermatologicals	D04 - Antipruritics, incl. antihistamines, anesthetics, etc.	D04A - Antipruritics, incl. antihistamines, anesthetics, etc.	D04AB - Anesthetics for topical use	D04AB01	Lidocaine	3676
D - Dermatologicals	D04 - Antipruritics, incl. antihistamines, anesthetics, etc.	D04A - Antipruritics, incl. antihistamines, anesthetics, etc.	D04AB - Anesthetics for topical use	D04AB02	Cinchocaine	3025
D - Dermatologicals	D04 - Antipruritics, incl. antihistamines, anesthetics, etc.	D04A - Antipruritics, incl. antihistamines, anesthetics, etc.	D04AB - Anesthetics for topical use	D04AB03	Oxybuprocaine	4633
D - Dermatologicals	D04 - Antipruritics, incl. antihistamines, anesthetics, etc.	D04A - Antipruritics, incl. antihistamines, anesthetics, etc.	D04AB - Anesthetics for topical use	D04AB04	Benzocaine	2337
D - Dermatologicals	D04 - Antipruritics, incl. antihistamines, anesthetics, etc.	D04A - Antipruritics, incl. antihistamines, anesthetics, etc.	D04AB - Anesthetics for topical use	D04AB05	Quinisocaine	6857
D - Dermatologicals	D04 - Antipruritics, incl. antihistamines, anesthetics, etc.	D04A - Antipruritics, incl. antihistamines, anesthetics, etc.	D04AB - Anesthetics for topical use	D04AB06	Tetracaine	5411
D - Dermatologicals	D04 - Antipruritics, incl. antihistamines, anesthetics, etc.	D04A - Antipruritics, incl. antihistamines, anesthetics, etc.	D04AB - Anesthetics for topical use	D04AB07	Pramocaine	4886
D - Dermatologicals	D04 - Antipruritics, incl. antihistamines, anesthetics, etc.	D04A - Antipruritics, incl. antihistamines, anesthetics, etc.	D04AX - Other antipruritics	D04AX01	Doxepin	667477
D - Dermatologicals	D05 - Antipsoriatics	D05A - Antipsoriatics for topical use	D05AC - Antracen derivatives	D05AC01	Dithranol	2202
D - Dermatologicals	D05 - Antipsoriatics	D05A - Antipsoriatics for topical use	D05AC - Antracen derivatives	D05AC51	Dithranol, combinations	-1
D - Dermatologicals	D05 - Antipsoriatics	D05A - Antipsoriatics for topical use	D05AD - Psoralens for topical use	D05AD01	Trioxysalen	5585
D - Dermatologicals	D05 - Antipsoriatics	D05A - Antipsoriatics for topical use	D05AD - Psoralens for topical use	D05AD02	Methoxsalen	4114
D - Dermatologicals	D05 - Antipsoriatics	D05A - Antipsoriatics for topical use	D05AX - Other antipsoriatics for topical use	D05AX01	Fumaric acid	444972
D - Dermatologicals	D05 - Antipsoriatics	D05A - Antipsoriatics for topical use	D05AX - Other antipsoriatics for topical use	D05AX02	Calcipotriol	5288783
D - Dermatologicals	D05 - Antipsoriatics	D05A - Antipsoriatics for topical use	D05AX - Other antipsoriatics for topical use	D05AX03	Calcitriol	5280453
D - Dermatologicals	D05 - Antipsoriatics	D05A - Antipsoriatics for topical use	D05AX - Other antipsoriatics for topical use	D05AX04	Tacalcitol	5283734
D - Dermatologicals	D05 - Antipsoriatics	D05A - Antipsoriatics for topical use	D05AX - Other antipsoriatics for topical use	D05AX05	Tazarotene	5381
D - Dermatologicals	D05 - Antipsoriatics	D05A - Antipsoriatics for topical use	D05AX - Other antipsoriatics for topical use	D05AX06	Roflumilast	449193
D - Dermatologicals	D05 - Antipsoriatics	D05A - Antipsoriatics for topical use	D05AX - Other antipsoriatics for topical use	D05AX07	Tapinarof	6439522
D - Dermatologicals	D05 - Antipsoriatics	D05A - Antipsoriatics for topical use	D05AX - Other antipsoriatics for topical use	D05AX52	Calcipotriol, combinations	-1
D - Dermatologicals	D05 - Antipsoriatics	D05A - Antipsoriatics for topical use	D05AX - Other antipsoriatics for topical use	D05AX55	Tazarotene and ulobetasol	-1
D - Dermatologicals	D05 - Antipsoriatics	D05B - Antipsoriatics for systemic use	D05BA - Psoralens for systemic use	D05BA01	Trioxysalen	5585
D - Dermatologicals	D05 - Antipsoriatics	D05B - Antipsoriatics for systemic use	D05BA - Psoralens for systemic use	D05BA02	Methoxsalen	4114
D - Dermatologicals	D05 - Antipsoriatics	D05B - Antipsoriatics for systemic use	D05BA - Psoralens for systemic use	D05BA03	Bergapten	2355
D - Dermatologicals	D05 - Antipsoriatics	D05B - Antipsoriatics for systemic use	D05BB - Retinoids for treatment of psoriasis	D05BB01	Etretinate	5282375
D - Dermatologicals	D05 - Antipsoriatics	D05B - Antipsoriatics for systemic use	D05BB - Retinoids for treatment of psoriasis	D05BB02	Acitretin	5284513
D - Dermatologicals	D05 - Antipsoriatics	D05B - Antipsoriatics for systemic use	D05BX - Other antipsoriatics for systemic use	D05BX51	Fumaric acid derivatives, combinations	-1
D - Dermatologicals	D06 - Antibiotics and chemotherapeutics for dermatological use	D06A - Antibiotics for topical use	D06AA - Tetracycline and derivatives	D06AA01	Demeclocycline	54680690
D - Dermatologicals	D06 - Antibiotics and chemotherapeutics for dermatological use	D06A - Antibiotics for topical use	D06AA - Tetracycline and derivatives	D06AA02	Chlortetracycline	54675777
D - Dermatologicals	D06 - Antibiotics and chemotherapeutics for dermatological use	D06A - Antibiotics for topical use	D06AA - Tetracycline and derivatives	D06AA03	Oxytetracycline	54675779
D - Dermatologicals	D06 - Antibiotics and chemotherapeutics for dermatological use	D06A - Antibiotics for topical use	D06AA - Tetracycline and derivatives	D06AA04	Tetracycline	54675776
D - Dermatologicals	D06 - Antibiotics and chemotherapeutics for dermatological use	D06A - Antibiotics for topical use	D06AX - Other antibiotics for topical use	D06AX01	Fusidic acid	3000226
D - Dermatologicals	D06 - Antibiotics and chemotherapeutics for dermatological use	D06A - Antibiotics for topical use	D07AX - Other antibiotics for topical use	D06AX02	Chloramphenicol	5959
D - Dermatologicals	D06 - Antibiotics and chemotherapeutics for dermatological use	D06A - Antibiotics for topical use	D08AX - Other antibiotics for topical use	D06AX04	Neomycin	8378
D - Dermatologicals	D06 - Antibiotics and chemotherapeutics for dermatological use	D06A - Antibiotics for topical use	D09AX - Other antibiotics for topical use	D06AX05	Bacitracin	-1
D - Dermatologicals	D06 - Antibiotics and chemotherapeutics for dermatological use	D06A - Antibiotics for topical use	D10AX - Other antibiotics for topical use	D06AX07	Gentamicin	3467
D - Dermatologicals	D06 - Antibiotics and chemotherapeutics for dermatological use	D06A - Antibiotics for topical use	D11AX - Other antibiotics for topical use	D06AX08	Tyrothricin	452550
D - Dermatologicals	D06 - Antibiotics and chemotherapeutics for dermatological use	D06A - Antibiotics for topical use	D12AX - Other antibiotics for topical use	D06AX09	Mupirocin	446596
D - Dermatologicals	D06 - Antibiotics and chemotherapeutics for dermatological use	D06A - Antibiotics for topical use	D13AX - Other antibiotics for topical use	D06AX10	Virginiamycin	11979535
D - Dermatologicals	D06 - Antibiotics and chemotherapeutics for dermatological use	D06A - Antibiotics for topical use	D14AX - Other antibiotics for topical use	D06AX11	Rifaximin	6436173
D - Dermatologicals	D06 - Antibiotics and chemotherapeutics for dermatological use	D06A - Antibiotics for topical use	D15AX - Other antibiotics for topical use	D06AX12	Amikacin	37768
D - Dermatologicals	D06 - Antibiotics and chemotherapeutics for dermatological use	D06A - Antibiotics for topical use	D16AX - Other antibiotics for topical use	D06AX13	Retapamulin	6918462
D - Dermatologicals	D06 - Antibiotics and chemotherapeutics for dermatological use	D06A - Antibiotics for topical use	D17AX - Other antibiotics for topical use	D06AX14	Ozenoxacin	9863827
D - Dermatologicals	D06 - Antibiotics and chemotherapeutics for dermatological use	D06A - Antibiotics for topical use	D18AX - Other antibiotics for topical use	D06AX15	Rifamycin	6324616
D - Dermatologicals	D06 - Antibiotics and chemotherapeutics for dermatological use	D06B - Chemotherapeutics for topical use	D06BA - Sulfonamides	D06BA01	Silver sulfadiazine	441244
D - Dermatologicals	D06 - Antibiotics and chemotherapeutics for dermatological use	D06B - Chemotherapeutics for topical use	D06BA - Sulfonamides	D06BA02	Sulfathiazole	5340
D - Dermatologicals	D06 - Antibiotics and chemotherapeutics for dermatological use	D06B - Chemotherapeutics for topical use	D06BA - Sulfonamides	D06BA03	Mafenide	3998
D - Dermatologicals	D06 - Antibiotics and chemotherapeutics for dermatological use	D06B - Chemotherapeutics for topical use	D06BA - Sulfonamides	D06BA04	Sulfamethizole	5328
D - Dermatologicals	D06 - Antibiotics and chemotherapeutics for dermatological use	D06B - Chemotherapeutics for topical use	D06BA - Sulfonamides	D06BA05	Sulfanilamide	5333
D - Dermatologicals	D06 - Antibiotics and chemotherapeutics for dermatological use	D06B - Chemotherapeutics for topical use	D06BA - Sulfonamides	D06BA06	Sulfamerazine	5325
D - Dermatologicals	D06 - Antibiotics and chemotherapeutics for dermatological use	D06B - Chemotherapeutics for topical use	D06BA - Sulfonamides	D06BA51	Silver sulfadiazine, combinations	-1
D - Dermatologicals	D06 - Antibiotics and chemotherapeutics for dermatological use	D06B - Chemotherapeutics for topical use	D06BB - Antivirals	D06BB01	Idoxuridine	5905
D - Dermatologicals	D06 - Antibiotics and chemotherapeutics for dermatological use	D06B - Chemotherapeutics for topical use	D06BB - Antivirals	D06BB02	Tromantadine	64377
D - Dermatologicals	D06 - Antibiotics and chemotherapeutics for dermatological use	D06B - Chemotherapeutics for topical use	D06BB - Antivirals	D06BB03	Aciclovir	135398513
D - Dermatologicals	D06 - Antibiotics and chemotherapeutics for dermatological use	D06B - Chemotherapeutics for topical use	D06BB - Antivirals	D06BB04	Podophyllotoxin	10607
D - Dermatologicals	D06 - Antibiotics and chemotherapeutics for dermatological use	D06B - Chemotherapeutics for topical use	D06BB - Antivirals	D06BB05	Inosine	135398641
D - Dermatologicals	D06 - Antibiotics and chemotherapeutics for dermatological use	D06B - Chemotherapeutics for topical use	D06BB - Antivirals	D06BB06	Penciclovir	135398748
D - Dermatologicals	D06 - Antibiotics and chemotherapeutics for dermatological use	D06B - Chemotherapeutics for topical use	D06BB - Antivirals	D06BB07	Lysozyme	16129749
D - Dermatologicals	D06 - Antibiotics and chemotherapeutics for dermatological use	D06B - Chemotherapeutics for topical use	D06BB - Antivirals	D06BB08	Ibacitabine	65050
D - Dermatologicals	D06 - Antibiotics and chemotherapeutics for dermatological use	D06B - Chemotherapeutics for topical use	D06BB - Antivirals	D06BB09	Edoxudine	66377
D - Dermatologicals	D06 - Antibiotics and chemotherapeutics for dermatological use	D06B - Chemotherapeutics for topical use	D06BB - Antivirals	D06BB10	Imiquimod	57469
D - Dermatologicals	D06 - Antibiotics and chemotherapeutics for dermatological use	D06B - Chemotherapeutics for topical use	D06BB - Antivirals	D06BB11	Docosanol	12620
D - Dermatologicals	D06 - Antibiotics and chemotherapeutics for dermatological use	D06B - Chemotherapeutics for topical use	D06BB - Antivirals	D06BB12	Sinecatechins	-1
D - Dermatologicals	D06 - Antibiotics and chemotherapeutics for dermatological use	D06B - Chemotherapeutics for topical use	D06BB - Antivirals	D06BB53	Aciclovir, combinations	-1
D - Dermatologicals	D06 - Antibiotics and chemotherapeutics for dermatological use	D06B - Chemotherapeutics for topical use	D06BX - Other chemotherapeutics	D06BX01	Metronidazole	4173
D - Dermatologicals	D06 - Antibiotics and chemotherapeutics for dermatological use	D06B - Chemotherapeutics for topical use	D06BX - Other chemotherapeutics	D06BX02	Ingenol mebutate	6918670
D - Dermatologicals	D06 - Antibiotics and chemotherapeutics for dermatological use	D06B - Chemotherapeutics for topical use	D06BX - Other chemotherapeutics	D06BX03	Tirbanibulin	23635314
D - Dermatologicals	D07 - Corticosteroids, dermatological preparations	D07A - Corticosteroids, plain	D07AA - Corticosteroids, weak (group i)	D07AA01	Methylprednisolone	6741
D - Dermatologicals	D07 - Corticosteroids, dermatological preparations	D07A - Corticosteroids, plain	D07AA - Corticosteroids, weak (group i)	D07AA02	Hydrocortisone	5754
D - Dermatologicals	D07 - Corticosteroids, dermatological preparations	D07A - Corticosteroids, plain	D07AA - Corticosteroids, weak (group i)	D07AA03	Prednisolone	5755
D - Dermatologicals	D07 - Corticosteroids, dermatological preparations	D07A - Corticosteroids, plain	D07AB - Corticosteroids, moderately potent (group ii)	D07AB01	Clobetasone	71387
D - Dermatologicals	D07 - Corticosteroids, dermatological preparations	D07A - Corticosteroids, plain	D07AB - Corticosteroids, moderately potent (group ii)	D07AB02	Hydrocortisone butyrate	26133
D - Dermatologicals	D07 - Corticosteroids, dermatological preparations	D07A - Corticosteroids, plain	D07AB - Corticosteroids, moderately potent (group ii)	D07AB03	Flumetasone	16490
D - Dermatologicals	D07 - Corticosteroids, dermatological preparations	D07A - Corticosteroids, plain	D07AB - Corticosteroids, moderately potent (group ii)	D07AB04	Fluocortin	22875828
D - Dermatologicals	D07 - Corticosteroids, dermatological preparations	D07A - Corticosteroids, plain	D07AB - Corticosteroids, moderately potent (group ii)	D07AB05	Fluperolone	56841872
D - Dermatologicals	D07 - Corticosteroids, dermatological preparations	D07A - Corticosteroids, plain	D07AB - Corticosteroids, moderately potent (group ii)	D07AB06	Fluorometholone	9878
D - Dermatologicals	D07 - Corticosteroids, dermatological preparations	D07A - Corticosteroids, plain	D07AB - Corticosteroids, moderately potent (group ii)	D07AB07	Fluprednidene	11794741
D - Dermatologicals	D07 - Corticosteroids, dermatological preparations	D07A - Corticosteroids, plain	D07AB - Corticosteroids, moderately potent (group ii)	D07AB08	Desonide	5311066
D - Dermatologicals	D07 - Corticosteroids, dermatological preparations	D07A - Corticosteroids, plain	D07AB - Corticosteroids, moderately potent (group ii)	D07AB09	Triamcinolone	31307
D - Dermatologicals	D07 - Corticosteroids, dermatological preparations	D07A - Corticosteroids, plain	D07AB - Corticosteroids, moderately potent (group ii)	D07AB10	Alclometasone	5311000
D - Dermatologicals	D07 - Corticosteroids, dermatological preparations	D07A - Corticosteroids, plain	D07AB - Corticosteroids, moderately potent (group ii)	D07AB11	Hydrocortisone buteprate	636398
D - Dermatologicals	D07 - Corticosteroids, dermatological preparations	D07A - Corticosteroids, plain	D07AB - Corticosteroids, moderately potent (group ii)	D07AB19	Dexamethasone	5743
D - Dermatologicals	D07 - Corticosteroids, dermatological preparations	D07A - Corticosteroids, plain	D07AB - Corticosteroids, moderately potent (group ii)	D07AB21	Clocortolone	5311052
D - Dermatologicals	D07 - Corticosteroids, dermatological preparations	D07A - Corticosteroids, plain	D07AB - Corticosteroids, moderately potent (group ii)	D07AB30	Combinations of corticosteroids	-1
D - Dermatologicals	D07 - Corticosteroids, dermatological preparations	D07A - Corticosteroids, plain	D07AC - Corticosteroids, potent (group iii)	D07AC01	Betamethasone	9782
D - Dermatologicals	D07 - Corticosteroids, dermatological preparations	D07A - Corticosteroids, plain	D07AC - Corticosteroids, potent (group iii)	D07AC02	Fluclorolone	76962649
D - Dermatologicals	D07 - Corticosteroids, dermatological preparations	D07A - Corticosteroids, plain	D07AC - Corticosteroids, potent (group iii)	D07AC03	Desoximetasone	5311067
D - Dermatologicals	D07 - Corticosteroids, dermatological preparations	D07A - Corticosteroids, plain	D07AC - Corticosteroids, potent (group iii)	D07AC04	Fluocinolone acetonide	6215
D - Dermatologicals	D07 - Corticosteroids, dermatological preparations	D07A - Corticosteroids, plain	D07AC - Corticosteroids, potent (group iii)	D07AC05	Fluocortolone	9053
D - Dermatologicals	D07 - Corticosteroids, dermatological preparations	D07A - Corticosteroids, plain	D07AC - Corticosteroids, potent (group iii)	D07AC06	Diflucortolone	11954369
D - Dermatologicals	D07 - Corticosteroids, dermatological preparations	D07A - Corticosteroids, plain	D07AC - Corticosteroids, potent (group iii)	D07AC07	Fludroxycortide	15209
D - Dermatologicals	D07 - Corticosteroids, dermatological preparations	D07A - Corticosteroids, plain	D07AC - Corticosteroids, potent (group iii)	D07AC08	Fluocinonide	9642
D - Dermatologicals	D07 - Corticosteroids, dermatological preparations	D07A - Corticosteroids, plain	D07AC - Corticosteroids, potent (group iii)	D07AC09	Budesonide	5281004
D - Dermatologicals	D07 - Corticosteroids, dermatological preparations	D07A - Corticosteroids, plain	D07AC - Corticosteroids, potent (group iii)	D07AC10	Diflorasone	71415
D - Dermatologicals	D07 - Corticosteroids, dermatological preparations	D07A - Corticosteroids, plain	D07AC - Corticosteroids, potent (group iii)	D07AC11	Amcinonide	443958
D - Dermatologicals	D07 - Corticosteroids, dermatological preparations	D07A - Corticosteroids, plain	D07AC - Corticosteroids, potent (group iii)	D07AC12	Halometasone	9846332
D - Dermatologicals	D07 - Corticosteroids, dermatological preparations	D07A - Corticosteroids, plain	D07AC - Corticosteroids, potent (group iii)	D07AC13	Mometasone	441335
D - Dermatologicals	D07 - Corticosteroids, dermatological preparations	D07A - Corticosteroids, plain	D07AC - Corticosteroids, potent (group iii)	D07AC14	Methylprednisolone aceponate	63019
D - Dermatologicals	D07 - Corticosteroids, dermatological preparations	D07A - Corticosteroids, plain	D07AC - Corticosteroids, potent (group iii)	D07AC15	Beclometasone	20469
D - Dermatologicals	D07 - Corticosteroids, dermatological preparations	D07A - Corticosteroids, plain	D07AC - Corticosteroids, potent (group iii)	D07AC16	Hydrocortisone aceponate	68921
D - Dermatologicals	D07 - Corticosteroids, dermatological preparations	D07A - Corticosteroids, plain	D07AC - Corticosteroids, potent (group iii)	D07AC17	Fluticasone	5311101
D - Dermatologicals	D07 - Corticosteroids, dermatological preparations	D07A - Corticosteroids, plain	D07AC - Corticosteroids, potent (group iii)	D07AC18	Prednicarbate	6714002
D - Dermatologicals	D07 - Corticosteroids, dermatological preparations	D07A - Corticosteroids, plain	D07AC - Corticosteroids, potent (group iii)	D07AC19	Difluprednate	443936
D - Dermatologicals	D07 - Corticosteroids, dermatological preparations	D07A - Corticosteroids, plain	D07AC - Corticosteroids, potent (group iii)	D07AC21	Ulobetasol	5311167
D - Dermatologicals	D07 - Corticosteroids, dermatological preparations	D07A - Corticosteroids, plain	D07AD - Corticosteroids, very potent (group iv)	D07AD01	Clobetasol	5311051
D - Dermatologicals	D07 - Corticosteroids, dermatological preparations	D07A - Corticosteroids, plain	D07AD - Corticosteroids, very potent (group iv)	D07AD02	Halcinonide	443943
D - Dermatologicals	D07 - Corticosteroids, dermatological preparations	D07B - Corticosteroids, combinations with antiseptics	D07BA - Corticosteroids, weak, combinations with antiseptics	D07BA01	Prednisolone and antiseptics	-1
D - Dermatologicals	D07 - Corticosteroids, dermatological preparations	D07B - Corticosteroids, combinations with antiseptics	D07BA - Corticosteroids, weak, combinations with antiseptics	D07BA04	Hydrocortisone and antiseptics	-1
D - Dermatologicals	D07 - Corticosteroids, dermatological preparations	D07B - Corticosteroids, combinations with antiseptics	D07BB - Corticosteroids, moderately potent, combinations with antiseptics	D07BB01	Flumetasone and antiseptics	-1
D - Dermatologicals	D07 - Corticosteroids, dermatological preparations	D07B - Corticosteroids, combinations with antiseptics	D07BB - Corticosteroids, moderately potent, combinations with antiseptics	D07BB02	Desonide and antiseptics	-1
D - Dermatologicals	D07 - Corticosteroids, dermatological preparations	D07B - Corticosteroids, combinations with antiseptics	D07BB - Corticosteroids, moderately potent, combinations with antiseptics	D07BB03	Triamcinolone and antiseptics	-1
D - Dermatologicals	D07 - Corticosteroids, dermatological preparations	D07B - Corticosteroids, combinations with antiseptics	D07BB - Corticosteroids, moderately potent, combinations with antiseptics	D07BB04	Hydrocortisone butyrate and antiseptics	-1
D - Dermatologicals	D07 - Corticosteroids, dermatological preparations	D07B - Corticosteroids, combinations with antiseptics	D07BC - Corticosteroids, potent, combinations with antiseptics	D07BC01	Betamethasone and antiseptics	-1
D - Dermatologicals	D07 - Corticosteroids, dermatological preparations	D07B - Corticosteroids, combinations with antiseptics	D07BC - Corticosteroids, potent, combinations with antiseptics	D07BC02	Fluocinolone acetonide and antiseptics	-1
D - Dermatologicals	D07 - Corticosteroids, dermatological preparations	D07B - Corticosteroids, combinations with antiseptics	D07BC - Corticosteroids, potent, combinations with antiseptics	D07BC03	Fluocortolone and antiseptics	-1
D - Dermatologicals	D07 - Corticosteroids, dermatological preparations	D07B - Corticosteroids, combinations with antiseptics	D07BC - Corticosteroids, potent, combinations with antiseptics	D07BC04	Diflucortolone and antiseptics	-1
D - Dermatologicals	D07 - Corticosteroids, dermatological preparations	D07C - Corticosteroids, combinations with antibiotics	D07CA - Corticosteroids, weak, combinations with antibiotics	D07CA01	Hydrocortisone and antibiotics	-1
D - Dermatologicals	D07 - Corticosteroids, dermatological preparations	D07C - Corticosteroids, combinations with antibiotics	D07CA - Corticosteroids, weak, combinations with antibiotics	D07CA02	Methylprednisolone and antibiotics	-1
D - Dermatologicals	D07 - Corticosteroids, dermatological preparations	D07C - Corticosteroids, combinations with antibiotics	D07CA - Corticosteroids, weak, combinations with antibiotics	D07CA03	Prednisolone and antibiotics	-1
D - Dermatologicals	D07 - Corticosteroids, dermatological preparations	D07C - Corticosteroids, combinations with antibiotics	D07CB - Corticosteroids, moderately potent, combinations with antibiotics	D07CB01	Triamcinolone and antibiotics	-1
D - Dermatologicals	D07 - Corticosteroids, dermatological preparations	D07C - Corticosteroids, combinations with antibiotics	D07CB - Corticosteroids, moderately potent, combinations with antibiotics	D07CB02	Fluprednidene and antibiotics	-1
D - Dermatologicals	D07 - Corticosteroids, dermatological preparations	D07C - Corticosteroids, combinations with antibiotics	D07CB - Corticosteroids, moderately potent, combinations with antibiotics	D07CB03	Fluorometholone and antibiotics	-1
D - Dermatologicals	D07 - Corticosteroids, dermatological preparations	D07C - Corticosteroids, combinations with antibiotics	D07CB - Corticosteroids, moderately potent, combinations with antibiotics	D07CB04	Dexamethasone and antibiotics	-1
D - Dermatologicals	D07 - Corticosteroids, dermatological preparations	D07C - Corticosteroids, combinations with antibiotics	D07CB - Corticosteroids, moderately potent, combinations with antibiotics	D07CB05	Flumetasone and antibiotics	-1
D - Dermatologicals	D07 - Corticosteroids, dermatological preparations	D07C - Corticosteroids, combinations with antibiotics	D07CC - Corticosteroids, potent, combinations with antibiotics	D07CC01	Betamethasone and antibiotics	-1
D - Dermatologicals	D07 - Corticosteroids, dermatological preparations	D07C - Corticosteroids, combinations with antibiotics	D07CC - Corticosteroids, potent, combinations with antibiotics	D07CC02	Fluocinolone acetonide and antibiotics	-1
D - Dermatologicals	D07 - Corticosteroids, dermatological preparations	D07C - Corticosteroids, combinations with antibiotics	D07CC - Corticosteroids, potent, combinations with antibiotics	D07CC03	Fludroxycortide and antibiotics	-1
D - Dermatologicals	D07 - Corticosteroids, dermatological preparations	D07C - Corticosteroids, combinations with antibiotics	D07CC - Corticosteroids, potent, combinations with antibiotics	D07CC04	Beclometasone and antibiotics	-1
D - Dermatologicals	D07 - Corticosteroids, dermatological preparations	D07C - Corticosteroids, combinations with antibiotics	D07CC - Corticosteroids, potent, combinations with antibiotics	D07CC05	Fluocinonide and antibiotics	-1
D - Dermatologicals	D07 - Corticosteroids, dermatological preparations	D07C - Corticosteroids, combinations with antibiotics	D07CC - Corticosteroids, potent, combinations with antibiotics	D07CC06	Fluocortolone and antibiotics	-1
D - Dermatologicals	D07 - Corticosteroids, dermatological preparations	D07C - Corticosteroids, combinations with antibiotics	D07CD - Corticosteroids, very potent, combinations with antibiotics	D07CD01	Clobetasol and antibiotics	-1
D - Dermatologicals	D07 - Corticosteroids, dermatological preparations	D07X - Corticosteroids, other combinations	D07XA - Corticosteroids, weak, other combinations	D07XA01	Hydrocortisone	5754
D - Dermatologicals	D07 - Corticosteroids, dermatological preparations	D07X - Corticosteroids, other combinations	D07XA - Corticosteroids, weak, other combinations	D07XA02	Prednisolone	5755
D - Dermatologicals	D07 - Corticosteroids, dermatological preparations	D07X - Corticosteroids, other combinations	D07XB - Corticosteroids, moderately potent, other combinations	D07XB01	Flumetasone	16490
D - Dermatologicals	D07 - Corticosteroids, dermatological preparations	D07X - Corticosteroids, other combinations	D07XB - Corticosteroids, moderately potent, other combinations	D07XB02	Triamcinolone	31307
D - Dermatologicals	D07 - Corticosteroids, dermatological preparations	D07X - Corticosteroids, other combinations	D07XB - Corticosteroids, moderately potent, other combinations	D07XB03	Fluprednidene	11794741
D - Dermatologicals	D07 - Corticosteroids, dermatological preparations	D07X - Corticosteroids, other combinations	D07XB - Corticosteroids, moderately potent, other combinations	D07XB04	Fluorometholone	9878
D - Dermatologicals	D07 - Corticosteroids, dermatological preparations	D07X - Corticosteroids, other combinations	D07XB - Corticosteroids, moderately potent, other combinations	D07XB05	Dexamethasone	5743
D - Dermatologicals	D07 - Corticosteroids, dermatological preparations	D07X - Corticosteroids, other combinations	D07XB - Corticosteroids, moderately potent, other combinations	D07XB30	Combinations of corticosteroids	-1
D - Dermatologicals	D07 - Corticosteroids, dermatological preparations	D07X - Corticosteroids, other combinations	D07XC - Corticosteroids, potent, other combinations	D07XC01	Betamethasone	9782
D - Dermatologicals	D07 - Corticosteroids, dermatological preparations	D07X - Corticosteroids, other combinations	D07XC - Corticosteroids, potent, other combinations	D07XC02	Desoximetasone	5311067
D - Dermatologicals	D07 - Corticosteroids, dermatological preparations	D07X - Corticosteroids, other combinations	D07XC - Corticosteroids, potent, other combinations	D07XC03	Mometasone	441335
D - Dermatologicals	D07 - Corticosteroids, dermatological preparations	D07X - Corticosteroids, other combinations	D07XC - Corticosteroids, potent, other combinations	D07XC04	Diflucortolone	11954369
D - Dermatologicals	D07 - Corticosteroids, dermatological preparations	D07X - Corticosteroids, other combinations	D07XC - Corticosteroids, potent, other combinations	D07XC05	Fluocortolone	9053
D - Dermatologicals	D08 - Antiseptics and disinfectants	D08A - Antiseptics and disinfectants	D08AA - Acridine derivatives	D08AA01	Ethacridine lactate	15789
D - Dermatologicals	D08 - Antiseptics and disinfectants	D08A - Antiseptics and disinfectants	D08AA - Acridine derivatives	D08AA02	Aminoacridine	7019
D - Dermatologicals	D08 - Antiseptics and disinfectants	D08A - Antiseptics and disinfectants	D08AA - Acridine derivatives	D08AA03	Euflavine	-1
D - Dermatologicals	D08 - Antiseptics and disinfectants	D08A - Antiseptics and disinfectants	D08AC - Biguanides and amidines	D08AC01	Dibrompropamidine	11974
D - Dermatologicals	D08 - Antiseptics and disinfectants	D08A - Antiseptics and disinfectants	D08AC - Biguanides and amidines	D08AC02	Chlorhexidine	9552079
D - Dermatologicals	D08 - Antiseptics and disinfectants	D08A - Antiseptics and disinfectants	D08AC - Biguanides and amidines	D08AC03	Propamidine	64949
D - Dermatologicals	D08 - Antiseptics and disinfectants	D08A - Antiseptics and disinfectants	D08AC - Biguanides and amidines	D08AC04	Hexamidine	65130
D - Dermatologicals	D08 - Antiseptics and disinfectants	D08A - Antiseptics and disinfectants	D08AC - Biguanides and amidines	D08AC05	Polihexanide	20977
D - Dermatologicals	D08 - Antiseptics and disinfectants	D08A - Antiseptics and disinfectants	D08AC - Biguanides and amidines	D08AC52	Chlorhexidine, combinations	-1
D - Dermatologicals	D08 - Antiseptics and disinfectants	D08A - Antiseptics and disinfectants	D08AE - Phenol and derivatives	D08AE01	Hexachlorophene	3598
D - Dermatologicals	D08 - Antiseptics and disinfectants	D08A - Antiseptics and disinfectants	D08AE - Phenol and derivatives	D08AE02	Policresulen	3050404
D - Dermatologicals	D08 - Antiseptics and disinfectants	D08A - Antiseptics and disinfectants	D08AE - Phenol and derivatives	D08AE03	Phenol	996
D - Dermatologicals	D08 - Antiseptics and disinfectants	D08A - Antiseptics and disinfectants	D08AE - Phenol and derivatives	D08AE04	Triclosan	5564
D - Dermatologicals	D08 - Antiseptics and disinfectants	D08A - Antiseptics and disinfectants	D08AE - Phenol and derivatives	D08AE05	Chloroxylenol	2723
D - Dermatologicals	D08 - Antiseptics and disinfectants	D08A - Antiseptics and disinfectants	D08AE - Phenol and derivatives	D08AE06	Biphenylol	7017
D - Dermatologicals	D08 - Antiseptics and disinfectants	D08A - Antiseptics and disinfectants	D08AF - Nitrofuran derivatives	D08AF01	Nitrofural	5447130
D - Dermatologicals	D08 - Antiseptics and disinfectants	D08A - Antiseptics and disinfectants	D08AG - Iodine products	D08AG01	Iodine/octylphenoxypolyglycolether	-1
D - Dermatologicals	D08 - Antiseptics and disinfectants	D08A - Antiseptics and disinfectants	D08AG - Iodine products	D08AG02	Povidone-iodine	410087
D - Dermatologicals	D08 - Antiseptics and disinfectants	D08A - Antiseptics and disinfectants	D08AG - Iodine products	D08AG03	Iodine	807
D - Dermatologicals	D08 - Antiseptics and disinfectants	D08A - Antiseptics and disinfectants	D08AG - Iodine products	D08AG04	Diiodohydroxypropane	68295
D - Dermatologicals	D08 - Antiseptics and disinfectants	D08A - Antiseptics and disinfectants	D08AH - Quinoline derivatives	D08AH01	Dequalinium	2993
D - Dermatologicals	D08 - Antiseptics and disinfectants	D08A - Antiseptics and disinfectants	D08AH - Quinoline derivatives	D08AH02	Chlorquinaldol	6301
D - Dermatologicals	D08 - Antiseptics and disinfectants	D08A - Antiseptics and disinfectants	D08AH - Quinoline derivatives	D08AH03	Oxyquinoline	1923
D - Dermatologicals	D08 - Antiseptics and disinfectants	D08A - Antiseptics and disinfectants	D08AH - Quinoline derivatives	D08AH30	Clioquinol	2788
D - Dermatologicals	D08 - Antiseptics and disinfectants	D08A - Antiseptics and disinfectants	D08AJ - Quaternary ammonium compounds	D08AJ01	Benzalkonium	2330
D - Dermatologicals	D08 - Antiseptics and disinfectants	D08A - Antiseptics and disinfectants	D08AJ - Quaternary ammonium compounds	D08AJ02	Cetrimonium	2681
D - Dermatologicals	D08 - Antiseptics and disinfectants	D08A - Antiseptics and disinfectants	D08AJ - Quaternary ammonium compounds	D08AJ03	Cetylpyridinium	2683
D - Dermatologicals	D08 - Antiseptics and disinfectants	D08A - Antiseptics and disinfectants	D08AJ - Quaternary ammonium compounds	D08AJ04	Cetrimide	14250
D - Dermatologicals	D08 - Antiseptics and disinfectants	D08A - Antiseptics and disinfectants	D08AJ - Quaternary ammonium compounds	D08AJ05	Benzoxonium chloride	29563
D - Dermatologicals	D08 - Antiseptics and disinfectants	D08A - Antiseptics and disinfectants	D08AJ - Quaternary ammonium compounds	D08AJ06	Didecyldimethylammonium chloride	23558
D - Dermatologicals	D08 - Antiseptics and disinfectants	D08A - Antiseptics and disinfectants	D08AJ - Quaternary ammonium compounds	D08AJ08	Benzethonium chloride	8478
D - Dermatologicals	D08 - Antiseptics and disinfectants	D08A - Antiseptics and disinfectants	D08AJ - Quaternary ammonium compounds	D08AJ10	Decamethoxine	162290
D - Dermatologicals	D08 - Antiseptics and disinfectants	D08A - Antiseptics and disinfectants	D08AJ - Quaternary ammonium compounds	D08AJ57	Octenidine, combinations	-1
D - Dermatologicals	D08 - Antiseptics and disinfectants	D08A - Antiseptics and disinfectants	D08AJ - Quaternary ammonium compounds	D08AJ58	Benzethonium chloride, combinations	-1
D - Dermatologicals	D08 - Antiseptics and disinfectants	D08A - Antiseptics and disinfectants	D08AJ - Quaternary ammonium compounds	D08AJ59	Dodeclonium bromide, combinations	-1
D - Dermatologicals	D08 - Antiseptics and disinfectants	D08A - Antiseptics and disinfectants	D08AK - Mercurial products	D08AK01	Mercuric amidochloride	3032553
D - Dermatologicals	D08 - Antiseptics and disinfectants	D08A - Antiseptics and disinfectants	D08AK - Mercurial products	D08AK02	Phenylmercuric borate	16684591
D - Dermatologicals	D08 - Antiseptics and disinfectants	D08A - Antiseptics and disinfectants	D08AK - Mercurial products	D08AK03	Mercuric chloride	24085
D - Dermatologicals	D08 - Antiseptics and disinfectants	D08A - Antiseptics and disinfectants	D08AK - Mercurial products	D08AK04	Merbromin	441373
D - Dermatologicals	D08 - Antiseptics and disinfectants	D08A - Antiseptics and disinfectants	D08AK - Mercurial products	D08AK05	Mercury, metallic	23931
D - Dermatologicals	D08 - Antiseptics and disinfectants	D08A - Antiseptics and disinfectants	D08AK - Mercurial products	D08AK06	Thiomersal	16684434
D - Dermatologicals	D08 - Antiseptics and disinfectants	D08A - Antiseptics and disinfectants	D08AK - Mercurial products	D08AK30	Mercuric iodide	24485
D - Dermatologicals	D08 - Antiseptics and disinfectants	D08A - Antiseptics and disinfectants	D08AL - Silver compounds	D08AL01	Silver nitrate	24470
D - Dermatologicals	D08 - Antiseptics and disinfectants	D08A - Antiseptics and disinfectants	D08AL - Silver compounds	D08AL30	Silver	23954
D - Dermatologicals	D08 - Antiseptics and disinfectants	D08A - Antiseptics and disinfectants	D08AX - Other antiseptics and disinfectants	D08AB	Aluminium agents	-1
D - Dermatologicals	D08 - Antiseptics and disinfectants	D08A - Antiseptics and disinfectants	D08AX - Other antiseptics and disinfectants	D08AD	Boric acid products	-1
D - Dermatologicals	D09 - Medicated dressings	D09A - Medicated dressings	D09AA - Medicated dressings with antiinfectives	D09AA01	Framycetin	8378
D - Dermatologicals	D09 - Medicated dressings	D09A - Medicated dressings	D09AA - Medicated dressings with antiinfectives	D09AA02	Fusidic acid	3000226
D - Dermatologicals	D09 - Medicated dressings	D09A - Medicated dressings	D09AA - Medicated dressings with antiinfectives	D09AA03	Nitrofural	5447130
D - Dermatologicals	D09 - Medicated dressings	D09A - Medicated dressings	D09AA - Medicated dressings with antiinfectives	D09AA04	Phenylmercuric nitrate	-1
D - Dermatologicals	D09 - Medicated dressings	D09A - Medicated dressings	D09AA - Medicated dressings with antiinfectives	D09AA05	Benzododecinium	8754
D - Dermatologicals	D09 - Medicated dressings	D09A - Medicated dressings	D09AA - Medicated dressings with antiinfectives	D09AA06	Triclosan	5564
D - Dermatologicals	D09 - Medicated dressings	D09A - Medicated dressings	D09AA - Medicated dressings with antiinfectives	D09AA07	Cetylpyridinium	2683
D - Dermatologicals	D09 - Medicated dressings	D09A - Medicated dressings	D09AA - Medicated dressings with antiinfectives	D09AA08	Aluminium chlorohydrate	-1
D - Dermatologicals	D09 - Medicated dressings	D09A - Medicated dressings	D09AA - Medicated dressings with antiinfectives	D09AA09	Povidone-iodine	410087
D - Dermatologicals	D09 - Medicated dressings	D09A - Medicated dressings	D09AA - Medicated dressings with antiinfectives	D09AA10	Clioquinol	2788
D - Dermatologicals	D09 - Medicated dressings	D09A - Medicated dressings	D09AA - Medicated dressings with antiinfectives	D09AA11	Benzalkonium	2330
D - Dermatologicals	D09 - Medicated dressings	D09A - Medicated dressings	D09AA - Medicated dressings with antiinfectives	D09AA12	Chlorhexidine	9552079
D - Dermatologicals	D09 - Medicated dressings	D09A - Medicated dressings	D09AA - Medicated dressings with antiinfectives	D09AA13	Iodoform	6374
D - Dermatologicals	D09 - Medicated dressings	D09A - Medicated dressings	D09AB - Zinc bandages	D09AB01	Zinc bandage without supplements	-1
D - Dermatologicals	D09 - Medicated dressings	D09A - Medicated dressings	D09AB - Zinc bandages	D09AB02	Zinc bandage with supplements	-1
D - Dermatologicals	D10 - Anti-acne preparations	D10A - Anti-acne preparations for topical use	D10AA - Corticosteroids, combinations for treatment of acne	D10AA01	Fluorometholone	9878
D - Dermatologicals	D10 - Anti-acne preparations	D10A - Anti-acne preparations for topical use	D10AA - Corticosteroids, combinations for treatment of acne	D10AA02	Methylprednisolone	6741
D - Dermatologicals	D10 - Anti-acne preparations	D10A - Anti-acne preparations for topical use	D10AA - Corticosteroids, combinations for treatment of acne	D10AA03	Dexamethasone	5743
D - Dermatologicals	D10 - Anti-acne preparations	D10A - Anti-acne preparations for topical use	D10AB - Preparations containing sulfur	D10AB01	Bithionol	2406
D - Dermatologicals	D10 - Anti-acne preparations	D10A - Anti-acne preparations for topical use	D10AB - Preparations containing sulfur	D10AB02	Sulfur	5362487
D - Dermatologicals	D10 - Anti-acne preparations	D10A - Anti-acne preparations for topical use	D10AB - Preparations containing sulfur	D10AB03	Tioxolone	72139
D - Dermatologicals	D10 - Anti-acne preparations	D10A - Anti-acne preparations for topical use	D10AB - Preparations containing sulfur	D10AB05	Mesulfen	667491
D - Dermatologicals	D10 - Anti-acne preparations	D10A - Anti-acne preparations for topical use	D10AD - Retinoids for topical use in acne	D10AD01	Tretinoin	444795
D - Dermatologicals	D10 - Anti-acne preparations	D10A - Anti-acne preparations for topical use	D10AD - Retinoids for topical use in acne	D10AD02	Retinol	445354
D - Dermatologicals	D10 - Anti-acne preparations	D10A - Anti-acne preparations for topical use	D10AD - Retinoids for topical use in acne	D10AD03	Adapalene	60164
D - Dermatologicals	D10 - Anti-acne preparations	D10A - Anti-acne preparations for topical use	D10AD - Retinoids for topical use in acne	D10AD04	Isotretinoin	5282379
D - Dermatologicals	D10 - Anti-acne preparations	D10A - Anti-acne preparations for topical use	D10AD - Retinoids for topical use in acne	D10AD05	Motretinide	6314185
D - Dermatologicals	D10 - Anti-acne preparations	D10A - Anti-acne preparations for topical use	D10AD - Retinoids for topical use in acne	D10AD06	Trifarotene	11518241
D - Dermatologicals	D10 - Anti-acne preparations	D10A - Anti-acne preparations for topical use	D10AD - Retinoids for topical use in acne	D10AD51	Tretinoin, combinations	-1
D - Dermatologicals	D10 - Anti-acne preparations	D10A - Anti-acne preparations for topical use	D10AD - Retinoids for topical use in acne	D10AD53	Adapalene, combinations	-1
D - Dermatologicals	D10 - Anti-acne preparations	D10A - Anti-acne preparations for topical use	D10AD - Retinoids for topical use in acne	D10AD54	Isotretinoin, combinations	-1
D - Dermatologicals	D10 - Anti-acne preparations	D10A - Anti-acne preparations for topical use	D10AE - Peroxides	D10AE01	Benzoyl peroxide	7187
D - Dermatologicals	D10 - Anti-acne preparations	D10A - Anti-acne preparations for topical use	D10AE - Peroxides	D10AE51	Benzoyl peroxide, combinations	-1
D - Dermatologicals	D10 - Anti-acne preparations	D10A - Anti-acne preparations for topical use	D10AF - Antiinfectives for treatment of acne	D10AF01	Clindamycin	446598
D - Dermatologicals	D10 - Anti-acne preparations	D10A - Anti-acne preparations for topical use	D10AF - Antiinfectives for treatment of acne	D10AF02	Erythromycin	12560
D - Dermatologicals	D10 - Anti-acne preparations	D10A - Anti-acne preparations for topical use	D10AF - Antiinfectives for treatment of acne	D10AF03	Chloramphenicol	5959
D - Dermatologicals	D10 - Anti-acne preparations	D10A - Anti-acne preparations for topical use	D10AF - Antiinfectives for treatment of acne	D10AF04	Meclocycline	54676539
D - Dermatologicals	D10 - Anti-acne preparations	D10A - Anti-acne preparations for topical use	D10AF - Antiinfectives for treatment of acne	D10AF05	Nadifloxacin	4410
D - Dermatologicals	D10 - Anti-acne preparations	D10A - Anti-acne preparations for topical use	D10AF - Antiinfectives for treatment of acne	D10AF06	Sulfacetamide	5320
D - Dermatologicals	D10 - Anti-acne preparations	D10A - Anti-acne preparations for topical use	D10AF - Antiinfectives for treatment of acne	D10AF07	Minocycline	54675783
D - Dermatologicals	D10 - Anti-acne preparations	D10A - Anti-acne preparations for topical use	D10AF - Antiinfectives for treatment of acne	D10AF51	Clindamycin, combinations	-1
D - Dermatologicals	D10 - Anti-acne preparations	D10A - Anti-acne preparations for topical use	D10AF - Antiinfectives for treatment of acne	D10AF52	Erythromycin, combinations	-1
D - Dermatologicals	D10 - Anti-acne preparations	D10A - Anti-acne preparations for topical use	D10AX - Other anti-acne preparations for topical use	D10AX01	Aluminium chloride	24012
D - Dermatologicals	D10 - Anti-acne preparations	D10A - Anti-acne preparations for topical use	D10AX - Other anti-acne preparations for topical use	D10AX02	Resorcinol	5054
D - Dermatologicals	D10 - Anti-acne preparations	D10A - Anti-acne preparations for topical use	D10AX - Other anti-acne preparations for topical use	D10AX03	Azelaic acid	2266
D - Dermatologicals	D10 - Anti-acne preparations	D10A - Anti-acne preparations for topical use	D10AX - Other anti-acne preparations for topical use	D10AX04	Aluminium oxide	9989226
D - Dermatologicals	D10 - Anti-acne preparations	D10A - Anti-acne preparations for topical use	D10AX - Other anti-acne preparations for topical use	D10AX05	Dapsone	2955
D - Dermatologicals	D10 - Anti-acne preparations	D10A - Anti-acne preparations for topical use	D10AX - Other anti-acne preparations for topical use	D10AX06	Clascoterone	11750009
D - Dermatologicals	D10 - Anti-acne preparations	D10A - Anti-acne preparations for topical use	D10AX - Other anti-acne preparations for topical use	D10AX30	Various combinations	-1
D - Dermatologicals	D10 - Anti-acne preparations	D10B - Anti-acne preparations for systemic use	D10BA - Retinoids for treatment of acne	D10BA01	Isotretinoin	5282379
D - Dermatologicals	D10 - Anti-acne preparations	D10B - Anti-acne preparations for systemic use	D10BX - Other anti-acne preparations for systemic use	D10BX01	Ichtasol	-1
D - Dermatologicals	D11 - Other dermatological preparations	D11A - Other dermatological preparations	D11AA - Antihidrotics	D11AA01	Glycopyrronium	3494
D - Dermatologicals	D11 - Other dermatological preparations	D11A - Other dermatological preparations	D11AC - Medicated shampoos	D11AC01	Cetrimide	14250
D - Dermatologicals	D11 - Other dermatological preparations	D11A - Other dermatological preparations	D11AC - Medicated shampoos	D11AC02	Cadmium compounds	-1
D - Dermatologicals	D11 - Other dermatological preparations	D11A - Other dermatological preparations	D11AC - Medicated shampoos	D11AC03	Selenium compounds	-1
D - Dermatologicals	D11 - Other dermatological preparations	D11A - Other dermatological preparations	D11AC - Medicated shampoos	D11AC06	Povidone-iodine	410087
D - Dermatologicals	D11 - Other dermatological preparations	D11A - Other dermatological preparations	D11AC - Medicated shampoos	D11AC08	Sulfur compounds	5362487
D - Dermatologicals	D11 - Other dermatological preparations	D11A - Other dermatological preparations	D11AC - Medicated shampoos	D11AC09	Xenysalate	21720
D - Dermatologicals	D11 - Other dermatological preparations	D11A - Other dermatological preparations	D11AC - Medicated shampoos	D11AC30	Others	-1
D - Dermatologicals	D11 - Other dermatological preparations	D11A - Other dermatological preparations	D11AE - Androgens for topical use	D11AE01	Metandienone	6300
D - Dermatologicals	D11 - Other dermatological preparations	D11A - Other dermatological preparations	D11AH - Agents for dermatitis, excluding corticosteroids	D11AH01	Tacrolimus	445643
D - Dermatologicals	D11 - Other dermatological preparations	D11A - Other dermatological preparations	D11AH - Agents for dermatitis, excluding corticosteroids	D11AH02	Pimecrolimus	6509979
D - Dermatologicals	D11 - Other dermatological preparations	D11A - Other dermatological preparations	D11AH - Agents for dermatitis, excluding corticosteroids	D11AH03	Cromoglicic acid	2882
D - Dermatologicals	D11 - Other dermatological preparations	D11A - Other dermatological preparations	D11AH - Agents for dermatitis, excluding corticosteroids	D11AH04	Alitretinoin	449171
D - Dermatologicals	D11 - Other dermatological preparations	D11A - Other dermatological preparations	D11AH - Agents for dermatitis, excluding corticosteroids	D11AH05	Dupilumab	-1
D - Dermatologicals	D11 - Other dermatological preparations	D11A - Other dermatological preparations	D11AH - Agents for dermatitis, excluding corticosteroids	D11AH06	Crisaborole	44591583
D - Dermatologicals	D11 - Other dermatological preparations	D11A - Other dermatological preparations	D11AH - Agents for dermatitis, excluding corticosteroids	D11AH07	Tralokinumab	-1
D - Dermatologicals	D11 - Other dermatological preparations	D11A - Other dermatological preparations	D11AH - Agents for dermatitis, excluding corticosteroids	D11AH08	Abrocitinib	78323835
D - Dermatologicals	D11 - Other dermatological preparations	D11A - Other dermatological preparations	D11AH - Agents for dermatitis, excluding corticosteroids	D11AH09	Ruxolitinib	25126798
D - Dermatologicals	D11 - Other dermatological preparations	D11A - Other dermatological preparations	D11AH - Agents for dermatitis, excluding corticosteroids	D11AH10	Lebrikizumab	-1
D - Dermatologicals	D11 - Other dermatological preparations	D11A - Other dermatological preparations	D11AH - Agents for dermatitis, excluding corticosteroids	D11AH11	Delgocitinib	50914062
D - Dermatologicals	D11 - Other dermatological preparations	D11A - Other dermatological preparations	D11AH - Agents for dermatitis, excluding corticosteroids	D11AH12	Nemolizumab	-1
D - Dermatologicals	D11 - Other dermatological preparations	D11A - Other dermatological preparations	D11AX - Other dermatologicals	D11AX01	Minoxidil	4201
D - Dermatologicals	D11 - Other dermatological preparations	D11A - Other dermatological preparations	D11AX - Other dermatologicals	D11AX02	Gamolenic acid	5280933
D - Dermatologicals	D11 - Other dermatological preparations	D11A - Other dermatological preparations	D11AX - Other dermatologicals	D11AX03	Calcium gluconate	9290
D - Dermatologicals	D11 - Other dermatological preparations	D11A - Other dermatological preparations	D11AX - Other dermatologicals	D11AX04	Lithium succinate	10197702
D - Dermatologicals	D11 - Other dermatological preparations	D11A - Other dermatological preparations	D11AX - Other dermatologicals	D11AX05	Magnesium sulfate	24083
D - Dermatologicals	D11 - Other dermatological preparations	D11A - Other dermatological preparations	D11AX - Other dermatologicals	D11AX06	Mequinol	9015
D - Dermatologicals	D11 - Other dermatological preparations	D11A - Other dermatological preparations	D11AX - Other dermatologicals	D11AX08	Tiratricol	5803
D - Dermatologicals	D11 - Other dermatological preparations	D11A - Other dermatological preparations	D11AX - Other dermatologicals	D11AX09	Oxaceprol	65784
D - Dermatologicals	D11 - Other dermatological preparations	D11A - Other dermatological preparations	D11AX - Other dermatologicals	D11AX10	Finasteride	57363
D - Dermatologicals	D11 - Other dermatological preparations	D11A - Other dermatological preparations	D11AX - Other dermatologicals	D11AX11	Hydroquinone	785
D - Dermatologicals	D11 - Other dermatological preparations	D11A - Other dermatological preparations	D11AX - Other dermatologicals	D11AX12	Pyrithione zinc	26041
D - Dermatologicals	D11 - Other dermatological preparations	D11A - Other dermatological preparations	D11AX - Other dermatologicals	D11AX13	Monobenzone	7638
D - Dermatologicals	D11 - Other dermatological preparations	D11A - Other dermatological preparations	D11AX - Other dermatologicals	D11AX16	Eflornithine	3009
D - Dermatologicals	D11 - Other dermatological preparations	D11A - Other dermatological preparations	D11AX - Other dermatologicals	D11AX18	Diclofenac	3033
D - Dermatologicals	D11 - Other dermatological preparations	D11A - Other dermatological preparations	D11AX - Other dermatologicals	D11AX21	Brimonidine	2435
D - Dermatologicals	D11 - Other dermatological preparations	D11A - Other dermatological preparations	D11AX - Other dermatologicals	D11AX22	Ivermectin	6321424
D - Dermatologicals	D11 - Other dermatological preparations	D11A - Other dermatological preparations	D11AX - Other dermatologicals	D11AX23	Aminobenzoate potassium	23663628
D - Dermatologicals	D11 - Other dermatological preparations	D11A - Other dermatological preparations	D11AX - Other dermatologicals	D11AX24	Deoxycholic acid	222528
D - Dermatologicals	D11 - Other dermatological preparations	D11A - Other dermatological preparations	D11AX - Other dermatologicals	D11AX25	Hydrogen peroxide	784
D - Dermatologicals	D11 - Other dermatological preparations	D11A - Other dermatological preparations	D11AX - Other dermatologicals	D11AX26	Caffeine	2519
D - Dermatologicals	D11 - Other dermatological preparations	D11A - Other dermatological preparations	D11AX - Other dermatologicals	D11AX27	Oxymetazoline	4636
D - Dermatologicals	D11 - Other dermatological preparations	D11A - Other dermatological preparations	D11AX - Other dermatologicals	D11AX52	Gamolenic acid, combinations	-1
D - Dermatologicals	D11 - Other dermatological preparations	D11A - Other dermatological preparations	D11AX - Other dermatologicals	D11AX57	Collagen, combinations	-1
G - Genito urinary system and sex hormones	G01 - Gynecological antiinfectives and antiseptics	G01A - Antiinfectives and antiseptics, excl. combinations with corticosteroids	G01AA - Antibiotics	G01AA01	Nystatin	6433272
G - Genito urinary system and sex hormones	G01 - Gynecological antiinfectives and antiseptics	G01A - Antiinfectives and antiseptics, excl. combinations with corticosteroids	G01AA - Antibiotics	G01AA02	Natamycin	5284447
G - Genito urinary system and sex hormones	G01 - Gynecological antiinfectives and antiseptics	G01A - Antiinfectives and antiseptics, excl. combinations with corticosteroids	G01AA - Antibiotics	G01AA03	Amphotericin B	5280965
G - Genito urinary system and sex hormones	G01 - Gynecological antiinfectives and antiseptics	G01A - Antiinfectives and antiseptics, excl. combinations with corticosteroids	G01AA - Antibiotics	G01AA04	Candicidin	10079874
G - Genito urinary system and sex hormones	G01 - Gynecological antiinfectives and antiseptics	G01A - Antiinfectives and antiseptics, excl. combinations with corticosteroids	G01AA - Antibiotics	G01AA05	Chloramphenicol	5959
G - Genito urinary system and sex hormones	G01 - Gynecological antiinfectives and antiseptics	G01A - Antiinfectives and antiseptics, excl. combinations with corticosteroids	G01AA - Antibiotics	G01AA06	Hachimycin	24883860
G - Genito urinary system and sex hormones	G01 - Gynecological antiinfectives and antiseptics	G01A - Antiinfectives and antiseptics, excl. combinations with corticosteroids	G01AA - Antibiotics	G01AA07	Oxytetracycline	54675779
G - Genito urinary system and sex hormones	G01 - Gynecological antiinfectives and antiseptics	G01A - Antiinfectives and antiseptics, excl. combinations with corticosteroids	G01AA - Antibiotics	G01AA08	Carfecillin	33672
G - Genito urinary system and sex hormones	G01 - Gynecological antiinfectives and antiseptics	G01A - Antiinfectives and antiseptics, excl. combinations with corticosteroids	G01AA - Antibiotics	G01AA09	Mepartricin	-1
G - Genito urinary system and sex hormones	G01 - Gynecological antiinfectives and antiseptics	G01A - Antiinfectives and antiseptics, excl. combinations with corticosteroids	G01AA - Antibiotics	G01AA10	Clindamycin	446598
G - Genito urinary system and sex hormones	G01 - Gynecological antiinfectives and antiseptics	G01A - Antiinfectives and antiseptics, excl. combinations with corticosteroids	G01AA - Antibiotics	G01AA11	Pentamycin	5282200
G - Genito urinary system and sex hormones	G01 - Gynecological antiinfectives and antiseptics	G01A - Antiinfectives and antiseptics, excl. combinations with corticosteroids	G01AA - Antibiotics	G01AA51	Nystatin, combinations	-1
G - Genito urinary system and sex hormones	G01 - Gynecological antiinfectives and antiseptics	G01A - Antiinfectives and antiseptics, excl. combinations with corticosteroids	G01AB - Arsenic compounds	G01AB01	Acetarsol	1985
G - Genito urinary system and sex hormones	G01 - Gynecological antiinfectives and antiseptics	G01A - Antiinfectives and antiseptics, excl. combinations with corticosteroids	G01AC - Quinoline derivatives	G01AC01	Diiodohydroxyquinoline	3728
G - Genito urinary system and sex hormones	G01 - Gynecological antiinfectives and antiseptics	G01A - Antiinfectives and antiseptics, excl. combinations with corticosteroids	G01AC - Quinoline derivatives	G01AC02	Clioquinol	2788
G - Genito urinary system and sex hormones	G01 - Gynecological antiinfectives and antiseptics	G01A - Antiinfectives and antiseptics, excl. combinations with corticosteroids	G01AC - Quinoline derivatives	G01AC03	Chlorquinaldol	6301
G - Genito urinary system and sex hormones	G01 - Gynecological antiinfectives and antiseptics	G01A - Antiinfectives and antiseptics, excl. combinations with corticosteroids	G01AC - Quinoline derivatives	G01AC05	Dequalinium	2993
G - Genito urinary system and sex hormones	G01 - Gynecological antiinfectives and antiseptics	G01A - Antiinfectives and antiseptics, excl. combinations with corticosteroids	G01AC - Quinoline derivatives	G01AC06	Broxyquinoline	2453
G - Genito urinary system and sex hormones	G01 - Gynecological antiinfectives and antiseptics	G01A - Antiinfectives and antiseptics, excl. combinations with corticosteroids	G01AC - Quinoline derivatives	G01AC30	Oxyquinoline	1923
G - Genito urinary system and sex hormones	G01 - Gynecological antiinfectives and antiseptics	G01A - Antiinfectives and antiseptics, excl. combinations with corticosteroids	G01AD - Organic acids	G01AD01	Lactic acid	612
G - Genito urinary system and sex hormones	G01 - Gynecological antiinfectives and antiseptics	G01A - Antiinfectives and antiseptics, excl. combinations with corticosteroids	G01AD - Organic acids	G01AD02	Acetic acid	176
G - Genito urinary system and sex hormones	G01 - Gynecological antiinfectives and antiseptics	G01A - Antiinfectives and antiseptics, excl. combinations with corticosteroids	G01AD - Organic acids	G01AD03	Ascorbic acid	54670067
G - Genito urinary system and sex hormones	G01 - Gynecological antiinfectives and antiseptics	G01A - Antiinfectives and antiseptics, excl. combinations with corticosteroids	G01AE - Sulfonamides	G01AE01	Sulfatolamide	3034019
G - Genito urinary system and sex hormones	G01 - Gynecological antiinfectives and antiseptics	G01A - Antiinfectives and antiseptics, excl. combinations with corticosteroids	G01AE - Sulfonamides	G01AE10	Combinations of sulfonamides	-1
G - Genito urinary system and sex hormones	G01 - Gynecological antiinfectives and antiseptics	G01A - Antiinfectives and antiseptics, excl. combinations with corticosteroids	G01AF - Imidazole derivatives	G01AF01	Metronidazole	4173
G - Genito urinary system and sex hormones	G01 - Gynecological antiinfectives and antiseptics	G01A - Antiinfectives and antiseptics, excl. combinations with corticosteroids	G01AF - Imidazole derivatives	G01AF02	Clotrimazole	2812
G - Genito urinary system and sex hormones	G01 - Gynecological antiinfectives and antiseptics	G01A - Antiinfectives and antiseptics, excl. combinations with corticosteroids	G01AF - Imidazole derivatives	G01AF04	Miconazole	4189
G - Genito urinary system and sex hormones	G01 - Gynecological antiinfectives and antiseptics	G01A - Antiinfectives and antiseptics, excl. combinations with corticosteroids	G01AF - Imidazole derivatives	G01AF05	Econazole	3198
G - Genito urinary system and sex hormones	G01 - Gynecological antiinfectives and antiseptics	G01A - Antiinfectives and antiseptics, excl. combinations with corticosteroids	G01AF - Imidazole derivatives	G01AF06	Ornidazole	28061
G - Genito urinary system and sex hormones	G01 - Gynecological antiinfectives and antiseptics	G01A - Antiinfectives and antiseptics, excl. combinations with corticosteroids	G01AF - Imidazole derivatives	G01AF07	Isoconazole	3760
G - Genito urinary system and sex hormones	G01 - Gynecological antiinfectives and antiseptics	G01A - Antiinfectives and antiseptics, excl. combinations with corticosteroids	G01AF - Imidazole derivatives	G01AF08	Tioconazole	5482
G - Genito urinary system and sex hormones	G01 - Gynecological antiinfectives and antiseptics	G01A - Antiinfectives and antiseptics, excl. combinations with corticosteroids	G01AF - Imidazole derivatives	G01AF11	Ketoconazole	456201
G - Genito urinary system and sex hormones	G01 - Gynecological antiinfectives and antiseptics	G01A - Antiinfectives and antiseptics, excl. combinations with corticosteroids	G01AF - Imidazole derivatives	G01AF12	Fenticonazole	51755
G - Genito urinary system and sex hormones	G01 - Gynecological antiinfectives and antiseptics	G01A - Antiinfectives and antiseptics, excl. combinations with corticosteroids	G01AF - Imidazole derivatives	G01AF13	Azanidazole	6436171
[truncated: 3,489 more rows]
